# Supplementary material for: Hypoxanthine Phosphoribosyl Transferase 1 Is Upregulated, Predicts Clinical Outcome and Controls Gene Expression in Breast Cancer
Source: Cancers (Basel). 2020 Jun 10;12(6):1522. doi: 10.3390/cancers12061522 (PMC7352670; doi:10.3390/cancers12061522)
Supplement: Supplementary file 1 [file cancers-12-01522-s001.zip › cancers-813885-suppl-1.pdf]

# Supplementary Materials: Hypoxanthine Phosphoribosyl Transferase 1 is Upregulated, Predicts Clinical Outcome and Controls Gene Expression in Breast Cancer

Melina J. Sedano, Enrique I. Ramos, Ramesh Choudhari, Alana L. Harrison, Ramadevi Subramani, Rajkumar Lakshmanaswamy, Mina Zilaie and Shrikanth S. Gadad

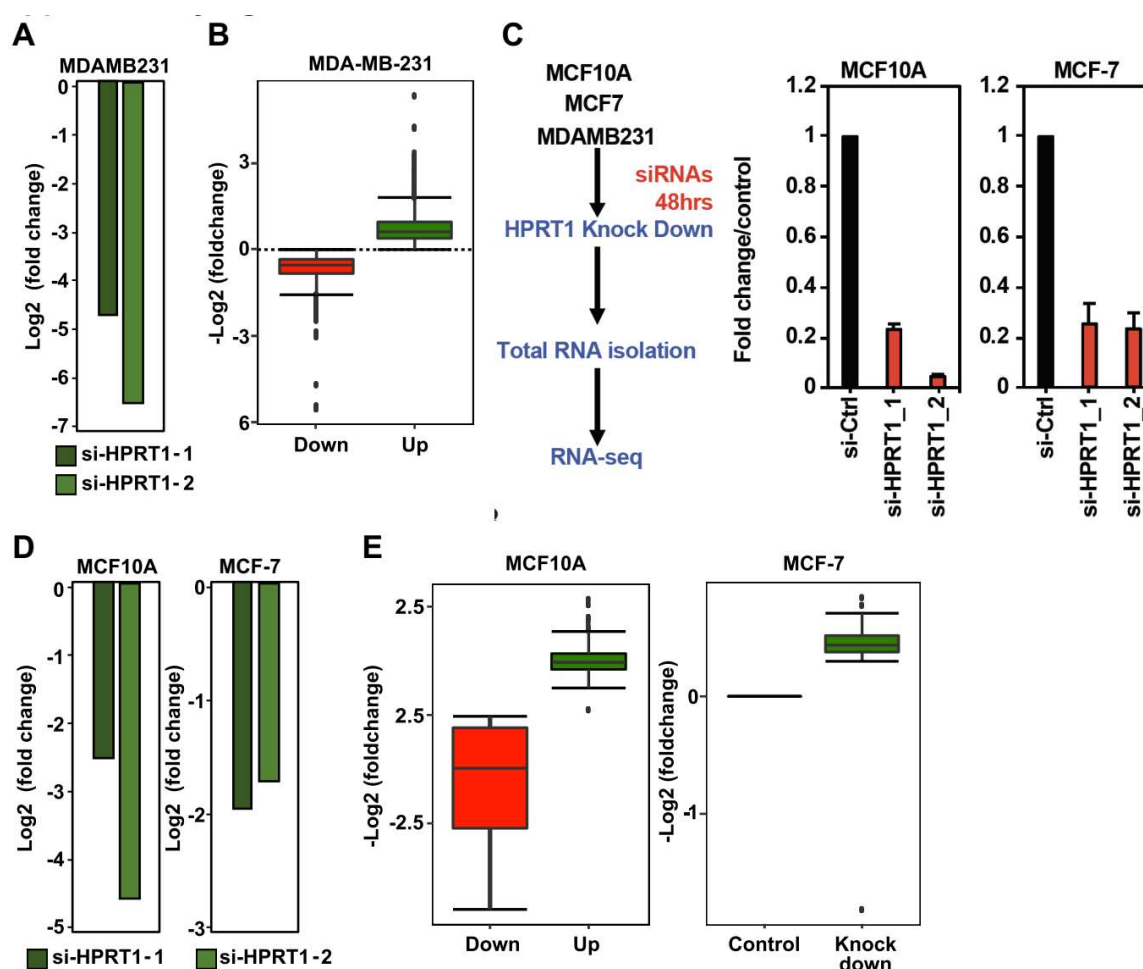

**Figure S1.** *HPRT1* knockdown in normal breast and breast cancer cells. *HPRT1* expression upon knockdown as assessed by RNA-seq in MDAMB231 (A) and MCF10A or MCF-7 cells (D). Box plot showing the effect on cumulative gene regulation upon *HPRT1* depletion (fold change/control) in MDAMB231 (B), MCF10A or MCF-7 cells (E). C. Knockdown of *HPRT1* using two different siRNAs in MCF10A (normal breast) and MCF-7 (ER+ breast cancer) cells.

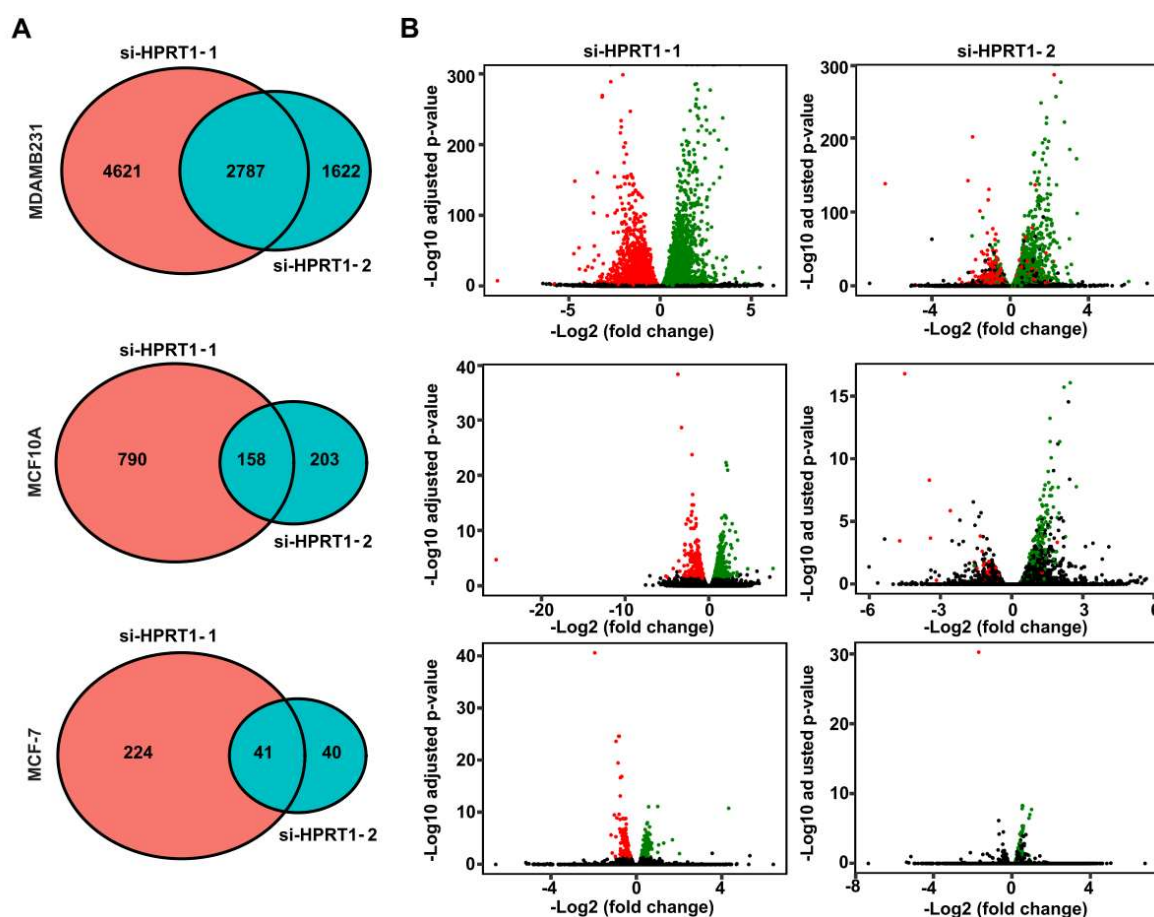

**Figure S2.** *HPRT1*-regulated genes in MDAMB231, MCF10A and MCF-7 cells. (A). Venn diagram showing the overlap of regulated genes upon *HPRT1* knockdown using two different siRNAs in MDAMB231, MCF10A, and MCF-7 cells. (B). Volcano plot showing the extent of individual gene regulation upon *HPRT1* knockdown based on p-value in MDAMB231, MCF10A, and MCF-7 cells.

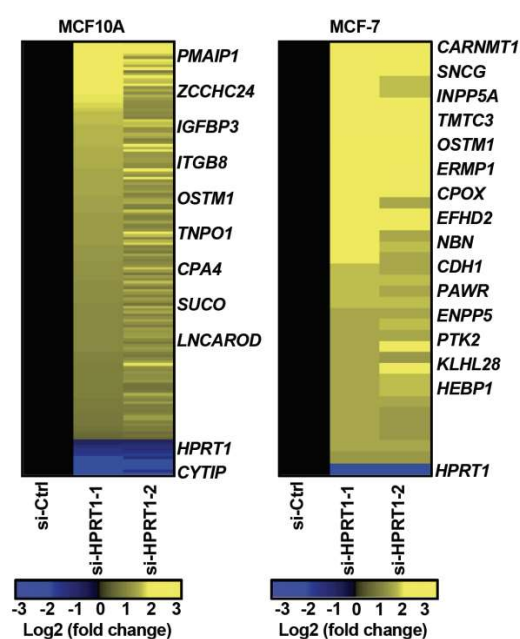

**Figure S3.** *HPRT1* knockdown in normal breast and ER+ breast cancer cell line. Heat map showing differential expression of genes upon *HPRT1* knockdown in MCF10A and MCF-7 cells.

**Table S1.** TCGA cancer types.

| Abbreviation     | Cancers                                                          |
|------------------|------------------------------------------------------------------|
| LAML             | Acute Myeloid Leukemia                                           |
| ACC              | Adrenocortical carcinoma                                         |
| BLCA             | Bladder Urothelial Carcinoma                                     |
| LGG              | Brain Lower Grade Glioma                                         |
| BRCA             | Breast invasive carcinoma                                        |
| CESC             | Cervical squamous cell carcinoma and endocervical adenocarcinoma |
| CHOL             | Cholangiocarcinoma                                               |
| COAD             | Colon adenocarcinoma                                             |
| ESCA             | Esophageal carcinoma                                             |
| GBM              | Glioblastoma multiforme                                          |
| HNSC             | Head and Neck squamous cell carcinoma                            |
| KICH             | Kidney Chromophobe                                               |
| KIRC             | Kidney renal clear cell carcinoma                                |
| KIRP             | Kidney renal papillary cell carcinoma                            |
| LIHC             | Liver hepatocellular carcinoma                                   |
| LUAD             | Lung adenocarcinoma                                              |
| LUSC             | Lung squamous cell carcinoma                                     |
| DLBC             | Lymphoid Neoplasm Diffuse Large B-cell Lymphoma                  |
| MESO             | Mesothelioma                                                     |
| OV               | Ovarian serous cystadenocarcinoma                                |
| PAAD             | Pancreatic adenocarcinoma                                        |
| PCPG             | Pheochromocytoma and Paraganglioma                               |
| PRAD             | Prostate adenocarcinoma                                          |
| READ             | Rectum adenocarcinoma                                            |
| SARC             | Sarcoma                                                          |
| SKCM             | Skin Cutaneous Melanoma                                          |
| STAD             | Stomach adenocarcinoma                                           |
| TGCT             | Testicular Germ Cell Tumors                                      |
| THYM             | Thymoma                                                          |
| THCA             | Thyroid carcinoma                                                |
| UCS              | Uterine Carcinosarcoma                                           |
| UCEC             | Uterine Corpus Endometrial Carcinoma                             |
| UVM              | Uveal Melanoma                                                   |
| GTE <sub>x</sub> | Genotype-Tissue Expression                                       |

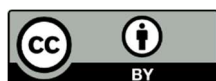

© 2020 by the authors. Licensee MDPI, Basel, Switzerland. This article is an open access article distributed under the terms and conditions of the Creative Commons Attribution (CC BY) license (<http://creativecommons.org/licenses/by/4.0/>).
