# Supplementary material for: Hypoxanthine Phosphoribosyl Transferase 1 Is Upregulated, Predicts Clinical Outcome and Controls Gene Expression in Breast Cancer
Source: Cancers (Basel). 2020 Jun 10;12(6):1522. doi: 10.3390/cancers12061522 (PMC7352670; doi:10.3390/cancers12061522)
Supplement: Supplementary file 1 [file cancers-12-01522-s001.zip › cancers-813885-Supplementary table 2, hprt1_rnaseq_vs_proteomic_intersect_genes.xlsx]

## Sheet: Downregulated
GeneID	RNA-seq si-HPRT1-2_log2 (FC)	Proteomics_si-HPRT1-2_log2(FC)
HPRT1	-6.39916	-1.25523
HNRNPA0	-0.217875	-0.876491
ACBD5	-0.278768	-0.80958
IFIT2	-1.17722	-0.766445
IFIT3	-0.807817	-0.725704
CTNND1	-0.451814	-0.671961
EIF4A3	-0.180962	-0.558679
PPM1A	-0.212532	-0.461426
COL6A1	-0.122179	-0.398937
S100A4	-0.219635	-0.387102
EIF4A2	-0.224344	-0.330245
AAMDC	-0.448879	-0.285759
TNPO2	-0.794392	-0.256758
CAPG	-0.202352	-0.23528
IFIT1	-0.931617	-0.231004
PSAP	-0.21562	-0.217624
H1F0	-0.79817	-0.212162
SLC9A3R1	-0.487739	-0.205
AKR1A1	-0.388522	-0.201854
GLS	-0.320286	-0.178588
PLXNA1	-0.151336	-0.173573
DDX58	-0.254228	-0.168363
ARHGEF2	-0.429618	-0.157241
SLC25A11	-0.399859	-0.147824
CAST	-0.174764	-0.140493
ENO2	-0.820709	-0.116578
ITGA6	-0.15296	-0.116324
DAG1	-0.252489	-0.0925778
SLC43A3	-0.380462	-0.0795676
CORO1B	-0.366443	-0.0722768
SMU1	-0.747632	-0.0665993
TOMM34	-0.319115	-0.0586173
NDUFA2	-0.293106	-0.0458286
XPNPEP1	-0.360984	-0.044422
SNX2	-0.238894	-0.0430956
PCBD1	-0.398994	-0.0416873
NSF	-0.624919	-0.0406324
RAP2B	-0.403898	-0.0377383
EGLN1	-0.334138	-0.0340357
DYNLRB1	-0.194146	-0.031168
SIN3A	-0.225742	-0.029501
PNP	-0.248398	-0.0288829
PSPC1	-0.253813	-0.028644
SH3GL1	-0.221157	-0.0247724
LMNA	-0.213152	-0.0217662
AP1G2	-0.340321	-0.019698
HK2	-0.486459	-0.0195652
PACS1	-0.2147	-0.0134526
GSS	-0.378484	-0.0116624
PRNP	-0.172588	-0.0114048
NUDT21	-0.453705	-0.00962839
ACO2	-0.309773	-0.00939544
HDAC2	-0.223305	-0.00894353
AP1M1	-0.28996	-0.00366911
