# Supplementary material for: Hypoxanthine Phosphoribosyl Transferase 1 Is Upregulated, Predicts Clinical Outcome and Controls Gene Expression in Breast Cancer
Source: Cancers (Basel). 2020 Jun 10;12(6):1522. doi: 10.3390/cancers12061522 (PMC7352670; doi:10.3390/cancers12061522)
Supplement: Supplementary file 1 [file cancers-12-01522-s001.zip › cancers-813885-Supplementary table 3; TMT quantification of differentially regulated protein upon HPRT1 knock down.xlsx]

## Sheet: Proteins
Protein FDR Confidence: Combined	Master	Accession	Description	Coverage [%]	# PSMs	MW [kDa]	Abundance: siCtrl	Abundance: siHPRT1-2	Abundance: siCtrl, normalized to RPL19	Abundance: siHPRT1-2, normalized to RPL19	Abundance: siHPRT1-2, si-Ctrl	Abundance: siHPRT1-2, si-Ctrl (log2FC)
High	Master Protein	P00492	Hypoxanthine-guanine phosphoribosyltransferase OS=Homo sapiens OX=9606 GN=HPRT1 PE=1 SV=2	38	8	24.6	951.6	255.7	5.34007	2.2371	0.418926	-1.25523
High	Master Protein	P30505	HLA class I histocompatibility antigen, Cw-8 alpha chain OS=Homo sapiens OX=9606 GN=HLA-C PE=1 SV=1	30	10	40.7	31.2	10.2	0.175084	0.0892388	0.509691	-0.972305
High	Master Protein	Q13151	Heterogeneous nuclear ribonucleoprotein A0 OS=Homo sapiens OX=9606 GN=HNRNPA0 PE=1 SV=1	24	7	30.8	286.8	100.2	1.60943	0.87664	0.544691	-0.876491
High	Master Protein	Q5T8D3	Acyl-CoA-binding domain-containing protein 5 OS=Homo sapiens OX=9606 GN=ACBD5 PE=1 SV=1	5	2	60.1	23.5	8.6	0.131874	0.0752406	0.570548	-0.80958
High	Master Protein	A0A087X279	Interferon-induced protein with tetratricopeptide repeats 2 OS=Homo sapiens OX=9606 GN=IFIT2 PE=1 SV=1	15	7	55.9	320.9	121	1.80079	1.05862	0.587864	-0.766445
High	Master Protein	P46063	ATP-dependent DNA helicase Q1 OS=Homo sapiens OX=9606 GN=RECQL PE=1 SV=3	4	3	73.4	53.6	20.7	0.300786	0.181102	0.602098	-0.73193
High	Master Protein	O14879	Interferon-induced protein with tetratricopeptide repeats 3 OS=Homo sapiens OX=9606 GN=IFIT3 PE=1 SV=1	12	5	56	168.1	65.2	0.943322	0.570429	0.604702	-0.725704
High	Master Protein	Q15833	Syntaxin-binding protein 2 OS=Homo sapiens OX=9606 GN=STXBP2 PE=1 SV=2	4	2	66.4	35.8	14	0.200898	0.122485	0.609686	-0.713861
High	Master Protein	Q05655	Protein kinase C delta type OS=Homo sapiens OX=9606 GN=PRKCD PE=1 SV=2	4	3	77.5	29.8	11.9	0.167228	0.104112	0.622576	-0.683679
High	Master Protein	P60983	Glia maturation factor beta OS=Homo sapiens OX=9606 GN=GMFB PE=1 SV=2	32	4	16.7	248.7	100	1.39562	0.874891	0.626882	-0.673735
High	Master Protein	O60716	Catenin delta-1 OS=Homo sapiens OX=9606 GN=CTNND1 PE=1 SV=1	10	8	108.1	216.6	87.2	1.21549	0.762905	0.627653	-0.671961
High	Master Protein	P42167	Lamina-associated polypeptide 2, isoforms beta/gamma OS=Homo sapiens OX=9606 GN=TMPO PE=1 SV=2	18	5	50.6	32.2	13.1	0.180696	0.114611	0.634274	-0.656822
High	Master Protein	P38919	Eukaryotic initiation factor 4A-III OS=Homo sapiens OX=9606 GN=EIF4A3 PE=1 SV=4	18	7	46.8	378.9	165	2.12626	1.44357	0.678923	-0.558679
High	Master Protein	Q8N684	Cleavage and polyadenylation specificity factor subunit 7 OS=Homo sapiens OX=9606 GN=CPSF7 PE=1 SV=1	9	4	52	218.9	96.3	1.2284	0.84252	0.68587	-0.543992
High	Master Protein	A0A1B0GTW1	Tight junction protein ZO-2 OS=Homo sapiens OX=9606 GN=TJP2 PE=1 SV=1	2	2	140.6	118.7	52.7	0.666105	0.461067	0.692184	-0.530773
High	Master Protein	P27701	CD82 antigen OS=Homo sapiens OX=9606 GN=CD82 PE=1 SV=1	9	2	29.6	76.8	34.4	0.430976	0.300962	0.698327	-0.518026
High	Master Protein	P35813	Protein phosphatase 1A OS=Homo sapiens OX=9606 GN=PPM1A PE=1 SV=1	8	2	42.4	16.1	7.5	0.0903479	0.0656168	0.726268	-0.461426
High	Master Protein	P52566	Rho GDP-dissociation inhibitor 2 OS=Homo sapiens OX=9606 GN=ARHGDIB PE=1 SV=3	39	6	23	358.1	169.2	2.00954	1.48031	0.736644	-0.440961
High	Master Protein	P58546	Myotrophin OS=Homo sapiens OX=9606 GN=MTPN PE=1 SV=2	33	4	12.9	301.9	142.9	1.69416	1.25022	0.737956	-0.438393
High	Master Protein	Q9NTJ5	Phosphatidylinositide phosphatase SAC1 OS=Homo sapiens OX=9606 GN=SACM1L PE=1 SV=2	6	3	66.9	39	18.5	0.218855	0.161855	0.739552	-0.435277
High	Master Protein	P12109	Collagen alpha-1(VI) chain OS=Homo sapiens OX=9606 GN=COL6A1 PE=1 SV=3	3	2	108.5	99.7	48.5	0.559484	0.424322	0.758417	-0.398937
High	Master Protein	P26006	Integrin alpha-3 OS=Homo sapiens OX=9606 GN=ITGA3 PE=1 SV=5	10	10	116.5	914.3	447.3	5.13075	3.91339	0.762731	-0.390753
High	Master Protein	P26447	Protein S100-A4 OS=Homo sapiens OX=9606 GN=S100A4 PE=1 SV=1	26	4	11.7	340.9	167.2	1.91302	1.46282	0.764664	-0.387102
High	Master Protein	Q6NUK1	Calcium-binding mitochondrial carrier protein SCaMC-1 OS=Homo sapiens OX=9606 GN=SLC25A24 PE=1 SV=2	20	9	53.3	480	235.9	2.6936	2.06387	0.766211	-0.384187
High	Master Protein	O95466	Formin-like protein 1 OS=Homo sapiens OX=9606 GN=FMNL1 PE=1 SV=3	2	2	121.8	81.9	40.4	0.459596	0.353456	0.769058	-0.378836
High	Master Protein	Q99873	Protein arginine N-methyltransferase 1 OS=Homo sapiens OX=9606 GN=PRMT1 PE=1 SV=3	33	12	42.4	998.3	492.8	5.60213	4.31146	0.769611	-0.377799
High	Master Protein	P49821	NADH dehydrogenase [ubiquinone] flavoprotein 1, mitochondrial OS=Homo sapiens OX=9606 GN=NDUFV1 PE=1 SV=4	7	3	50.8	76.3	37.7	0.428171	0.329834	0.770333	-0.376447
High	Master Protein	P32455	Guanylate-binding protein 1 OS=Homo sapiens OX=9606 GN=GBP1 PE=1 SV=2	9	6	67.9	514.3	254.7	2.88608	2.22835	0.772101	-0.373139
High	Master Protein	G3V1A6	Gasdermin domain containing 1, isoform CRA_d OS=Homo sapiens OX=9606 GN=GSDMD PE=1 SV=1	4	2	57.7	79.5	39.7	0.446128	0.347332	0.778547	-0.361144
High	Master Protein	Q9H299	SH3 domain-binding glutamic acid-rich-like protein 3 OS=Homo sapiens OX=9606 GN=SH3BGRL3 PE=1 SV=1	37	5	10.4	252.1	126.3	1.4147	1.10499	0.781074	-0.35647
High	Master Protein	P45973	Chromobox protein homolog 5 OS=Homo sapiens OX=9606 GN=CBX5 PE=1 SV=1	20	4	22.2	116.9	59.3	0.656004	0.51881	0.790864	-0.338499
High	Master Protein	P49755	Transmembrane emp24 domain-containing protein 10 OS=Homo sapiens OX=9606 GN=TMED10 PE=1 SV=2	34	6	25	731.7	372.8	4.10606	3.26159	0.794336	-0.332178
High	Master Protein	Q14240	Eukaryotic initiation factor 4A-II OS=Homo sapiens OX=9606 GN=EIF4A2 PE=1 SV=2	41	15	46.4	275	140.3	1.54321	1.22747	0.795402	-0.330245
High	Master Protein	P25685	DnaJ homolog subfamily B member 1 OS=Homo sapiens OX=9606 GN=DNAJB1 PE=1 SV=4	19	7	38	589.9	301.1	3.31033	2.6343	0.795781	-0.329556
High	Master Protein	P16144	Integrin beta-4 OS=Homo sapiens OX=9606 GN=ITGB4 PE=1 SV=5	5	7	202	133.9	68.7	0.751403	0.60105	0.799904	-0.322102
High	Master Protein	Q8WVY7	Ubiquitin-like domain-containing CTD phosphatase 1 OS=Homo sapiens OX=9606 GN=UBLCP1 PE=1 SV=2	9	3	36.8	159.8	82.3	0.896745	0.720035	0.802943	-0.316631
High	Master Protein	Q9P2R7	Succinate--CoA ligase [ADP-forming] subunit beta, mitochondrial OS=Homo sapiens OX=9606 GN=SUCLA2 PE=1 SV=3	3	2	50.3	73.1	37.7	0.410213	0.329834	0.804054	-0.314635
High	Master Protein	P49748	Very long-chain specific acyl-CoA dehydrogenase, mitochondrial OS=Homo sapiens OX=9606 GN=ACADVL PE=1 SV=1	25	13	70.3	930.2	480.1	5.21998	4.20035	0.804668	-0.313534
High	Master Protein	B0QZ18	Copine-1 OS=Homo sapiens OX=9606 GN=CPNE1 PE=1 SV=1	20	10	59.7	689.4	356.8	3.86869	3.12161	0.806891	-0.309554
High	Master Protein	Q9H5V8	CUB domain-containing protein 1 OS=Homo sapiens OX=9606 GN=CDCP1 PE=1 SV=3	3	3	92.9	96.1	49.8	0.539282	0.435696	0.807918	-0.307719
High	Master Protein	Q96TA1	Niban-like protein 1 OS=Homo sapiens OX=9606 GN=FAM129B PE=1 SV=3	17	13	84.1	683.8	355.7	3.83726	3.11199	0.810991	-0.302242
High	Master Protein	Q5VW32	BRO1 domain-containing protein BROX OS=Homo sapiens OX=9606 GN=BROX PE=1 SV=1	6	3	46.4	208	108.2	1.16723	0.946632	0.811008	-0.302211
High	Master Protein	A0A0A0MSY4	Dedicator of cytokinesis protein 9 OS=Homo sapiens OX=9606 GN=DOCK9 PE=1 SV=1	2	4	240.2	54.9	28.7	0.308081	0.251094	0.815025	-0.295083
High	Master Protein	Q8N392	Rho GTPase-activating protein 18 OS=Homo sapiens OX=9606 GN=ARHGAP18 PE=1 SV=3	2	2	74.9	67.5	35.3	0.378788	0.308836	0.815328	-0.294547
High	Master Protein	E9PR47	Mth938 domain-containing protein OS=Homo sapiens OX=9606 GN=AAMDC PE=1 SV=1	18	3	17.9	66.9	35.2	0.375421	0.307962	0.82031	-0.285759
High	Master Protein	A0A140T913	HLA class I histocompatibility antigen, A-3 alpha chain OS=Homo sapiens OX=9606 GN=HLA-A PE=1 SV=1	42	16	41.4	1204.2	638.6	6.75758	5.58705	0.826783	-0.274419
High	Master Protein	P00749	Urokinase-type plasminogen activator OS=Homo sapiens OX=9606 GN=PLAU PE=1 SV=2	4	2	48.5	200.6	106.4	1.1257	0.930884	0.826937	-0.274152
High	Master Protein	P41240	Tyrosine-protein kinase CSK OS=Homo sapiens OX=9606 GN=CSK PE=1 SV=1	2	2	50.7	89.5	47.6	0.502245	0.416448	0.829173	-0.270254
High	Master Protein	P02788	Lactotransferrin OS=Homo sapiens OX=9606 GN=LTF PE=1 SV=6	3	2	78.1	25.7	13.7	0.14422	0.11986	0.831092	-0.266921
High	Master Protein	P30483	HLA class I histocompatibility antigen, B-45 alpha chain OS=Homo sapiens OX=9606 GN=HLA-B PE=1 SV=1	19	6	40.4	86	45.9	0.482604	0.401575	0.8321	-0.265171
High	Master Protein	O14787	Transportin-2 OS=Homo sapiens OX=9606 GN=TNPO2 PE=1 SV=3	12	8	101.3	38	20.4	0.213244	0.178478	0.836966	-0.256758
High	Master Protein	Q9Y6A4	Cilia- and flagella-associated protein 20 OS=Homo sapiens OX=9606 GN=CFAP20 PE=1 SV=1	11	2	22.8	33.7	18.1	0.189113	0.158355	0.837356	-0.256087
High	Master Protein	O75874	Isocitrate dehydrogenase [NADP] cytoplasmic OS=Homo sapiens OX=9606 GN=IDH1 PE=1 SV=2	38	16	46.6	962.2	519.7	5.39955	4.54681	0.842071	-0.247986
High	Master Protein	Q9P258	Protein RCC2 OS=Homo sapiens OX=9606 GN=RCC2 PE=1 SV=2	3	2	56	50.5	27.3	0.283389	0.238845	0.842816	-0.246711
High	Master Protein	D6RFG8	Deoxycytidine kinase OS=Homo sapiens OX=9606 GN=DCK PE=1 SV=1	11	3	36.7	129.7	70.3	0.727834	0.615048	0.845039	-0.24291
High	Master Protein	P27144	Adenylate kinase 4, mitochondrial OS=Homo sapiens OX=9606 GN=AK4 PE=1 SV=1	26	3	25.3	200.2	108.7	1.12346	0.951006	0.8465	-0.240418
High	Master Protein	P14854	Cytochrome c oxidase subunit 6B1 OS=Homo sapiens OX=9606 GN=COX6B1 PE=1 SV=2	23	2	10.2	80.4	43.7	0.451178	0.382327	0.847397	-0.23889
High	Master Protein	P40121	Macrophage-capping protein OS=Homo sapiens OX=9606 GN=CAPG PE=1 SV=2	26	9	38.5	859.8	468.5	4.82492	4.09886	0.84952	-0.23528
High	Master Protein	Q9Y3Z3	Deoxynucleoside triphosphate triphosphohydrolase SAMHD1 OS=Homo sapiens OX=9606 GN=SAMHD1 PE=1 SV=2	13	6	72.2	118.9	64.9	0.667228	0.567804	0.85099	-0.232786
High	Master Protein	P09914	Interferon-induced protein with tetratricopeptide repeats 1 OS=Homo sapiens OX=9606 GN=IFIT1 PE=1 SV=2	4	2	55.3	94.6	51.7	0.530864	0.452318	0.852042	-0.231004
High	Master Protein	P21796	Voltage-dependent anion-selective channel protein 1 OS=Homo sapiens OX=9606 GN=VDAC1 PE=1 SV=2	57	15	30.8	898.1	491.5	5.03984	4.30009	0.853219	-0.229013
High	Master Protein	C9JIZ6	Prosaposin OS=Homo sapiens OX=9606 GN=PSAP PE=1 SV=2	15	7	58.4	486.4	268.3	2.72952	2.34733	0.85998	-0.217624
High	Master Protein	P11117	Lysosomal acid phosphatase OS=Homo sapiens OX=9606 GN=ACP2 PE=1 SV=3	7	3	48.3	53.1	29.3	0.29798	0.256343	0.86027	-0.217139
High	Master Protein	O15067	Phosphoribosylformylglycinamidine synthase OS=Homo sapiens OX=9606 GN=PFAS PE=1 SV=4	3	4	144.6	86.3	47.7	0.484287	0.417323	0.861726	-0.214699
High	Master Protein	P04114	Apolipoprotein B-100 OS=Homo sapiens OX=9606 GN=APOB PE=1 SV=2	0	3	515.3	284.7	157.5	1.59764	1.37795	0.862491	-0.213419
High	Master Protein	P07305	Histone H1.0 OS=Homo sapiens OX=9606 GN=H1F0 PE=1 SV=3	16	3	20.9	358.5	198.5	2.01178	1.73666	0.863243	-0.212162
High	Master Protein	P28065	Proteasome subunit beta type-9 OS=Homo sapiens OX=9606 GN=PSMB9 PE=1 SV=2	16	3	23.3	78.1	43.4	0.438272	0.379703	0.866364	-0.206956
High	Master Protein	O14745	Na(+)/H(+) exchange regulatory cofactor NHE-RF1 OS=Homo sapiens OX=9606 GN=SLC9A3R1 PE=1 SV=4	21	5	38.8	124	69	0.695847	0.603675	0.867539	-0.205
High	Master Protein	Q96N67	Dedicator of cytokinesis protein 7 OS=Homo sapiens OX=9606 GN=DOCK7 PE=1 SV=4	1	2	242.4	21.9	12.2	0.122896	0.106737	0.868515	-0.203378
High	Master Protein	P14550	Alcohol dehydrogenase [NADP(+)] OS=Homo sapiens OX=9606 GN=AKR1A1 PE=1 SV=3	15	5	36.6	147.4	82.2	0.82716	0.71916	0.869432	-0.201854
High	Master Protein	Q9UJU6	Drebrin-like protein OS=Homo sapiens OX=9606 GN=DBNL PE=1 SV=1	11	5	48.2	110.7	61.8	0.621212	0.540682	0.870367	-0.200305
High	Master Protein	Q9UH99	SUN domain-containing protein 2 OS=Homo sapiens OX=9606 GN=SUN2 PE=1 SV=3	2	2	80.3	19.5	10.9	0.109428	0.0953631	0.871472	-0.198474
High	Master Protein	E7ETB3	Aspartyl aminopeptidase OS=Homo sapiens OX=9606 GN=DNPEP PE=1 SV=2	7	3	54.5	46	25.8	0.258137	0.225722	0.874427	-0.193591
High	Master Protein	P02768	Serum albumin OS=Homo sapiens OX=9606 GN=ALB PE=1 SV=2	7	5	69.3	596.2	334.5	3.34568	2.92651	0.874713	-0.193118
High	Master Protein	O00592	Podocalyxin OS=Homo sapiens OX=9606 GN=PODXL PE=1 SV=2	6	3	58.6	153	86	0.858586	0.752406	0.876332	-0.190451
High	Master Protein	P62258	14-3-3 protein epsilon OS=Homo sapiens OX=9606 GN=YWHAE PE=1 SV=1	71	25	29.2	1747	983.6	9.80359	8.60542	0.877783	-0.188064
High	Master Protein	Q9UJ70	N-acetyl-D-glucosamine kinase OS=Homo sapiens OX=9606 GN=NAGK PE=1 SV=4	16	4	37.4	159.7	90.2	0.896184	0.789151	0.880568	-0.183493
High	Master Protein	P30460	HLA class I histocompatibility antigen, B-8 alpha chain OS=Homo sapiens OX=9606 GN=HLA-B PE=1 SV=1	34	11	40.3	682.3	385.7	3.82884	3.37445	0.881324	-0.182255
High	Master Protein	O94925	Glutaminase kidney isoform, mitochondrial OS=Homo sapiens OX=9606 GN=GLS PE=1 SV=1	6	4	73.4	252.5	143.1	1.41695	1.25197	0.883567	-0.178588
High	Master Protein	Q92552	28S ribosomal protein S27, mitochondrial OS=Homo sapiens OX=9606 GN=MRPS27 PE=1 SV=3	7	2	47.6	41.4	23.5	0.232323	0.205599	0.884971	-0.176298
High	Master Protein	Q9BXN6	Sperm protein associated with the nucleus on the X chromosome D OS=Homo sapiens OX=9606 GN=SPANXD PE=1 SV=1	24	2	11	124.6	70.8	0.699214	0.619423	0.885884	-0.174811
High	Master Protein	Q9UIW2	Plexin-A1 OS=Homo sapiens OX=9606 GN=PLXNA1 PE=1 SV=3	2	4	210.9	99.7	56.7	0.559484	0.496063	0.886644	-0.173573
High	Master Protein	C9JEJ2	Choline-phosphate cytidylyltransferase A OS=Homo sapiens OX=9606 GN=PCYT1A PE=1 SV=1	9	2	43.2	31.8	18.1	0.178451	0.158355	0.887387	-0.172365
High	Master Protein	Q9UKS6	Protein kinase C and casein kinase substrate in neurons protein 3 OS=Homo sapiens OX=9606 GN=PACSIN3 PE=1 SV=2	4	2	48.5	17	9.7	0.0953984	0.0848644	0.889579	-0.168806
High	Master Protein	O95786	Probable ATP-dependent RNA helicase DDX58 OS=Homo sapiens OX=9606 GN=DDX58 PE=1 SV=2	2	2	106.5	107.4	61.3	0.602694	0.536308	0.889852	-0.168363
High	Master Protein	Q9UGP8	Translocation protein SEC63 homolog OS=Homo sapiens OX=9606 GN=SEC63 PE=1 SV=2	13	8	87.9	227.3	129.9	1.27553	1.13648	0.890987	-0.166524
High	Master Protein	Q9Y6C9	Mitochondrial carrier homolog 2 OS=Homo sapiens OX=9606 GN=MTCH2 PE=1 SV=1	13	3	33.3	106.9	61.1	0.599888	0.534558	0.891097	-0.166346
High	Master Protein	P60903	Protein S100-A10 OS=Homo sapiens OX=9606 GN=S100A10 PE=1 SV=2	18	2	11.2	163.8	93.8	0.919192	0.820647	0.892792	-0.163604
High	Master Protein	Q9UMX0	Ubiquilin-1 OS=Homo sapiens OX=9606 GN=UBQLN1 PE=1 SV=2	6	2	62.5	21.3	12.2	0.119529	0.106737	0.89298	-0.1633
High	Master Protein	Q7Z2T5	TRMT1-like protein OS=Homo sapiens OX=9606 GN=TRMT1L PE=1 SV=2	3	2	81.7	20.6	11.8	0.1156	0.103237	0.893051	-0.163186
High	Master Protein	Q01970	1-phosphatidylinositol 4,5-bisphosphate phosphodiesterase beta-3 OS=Homo sapiens OX=9606 GN=PLCB3 PE=1 SV=2	2	3	138.7	27.4	15.7	0.15376	0.137358	0.893327	-0.162739
High	Master Protein	A6NHR9	Structural maintenance of chromosomes flexible hinge domain-containing protein 1 OS=Homo sapiens OX=9606 GN=SMCHD1 PE=1 SV=2	2	3	226.2	48	27.6	0.26936	0.24147	0.896457	-0.157694
High	Master Protein	V9GYM8	Rho guanine nucleotide exchange factor 2 OS=Homo sapiens OX=9606 GN=ARHGEF2 PE=1 SV=1	5	5	116	262.7	151.1	1.47419	1.32196	0.896739	-0.157241
High	Master Protein	O00505	Importin subunit alpha-4 OS=Homo sapiens OX=9606 GN=KPNA3 PE=1 SV=2	9	4	57.8	105.6	60.9	0.592593	0.532808	0.899114	-0.153424
High	Master Protein	Q9BZQ8	Protein Niban OS=Homo sapiens OX=9606 GN=FAM129A PE=1 SV=1	3	2	103.1	32.5	18.8	0.182379	0.164479	0.901853	-0.149035
High	Master Protein	P11279	Lysosome-associated membrane glycoprotein 1 OS=Homo sapiens OX=9606 GN=LAMP1 PE=1 SV=3	6	3	44.9	195.6	113.2	1.09764	0.990376	0.902275	-0.14836
High	Master Protein	E7ESZ7	NADH dehydrogenase [ubiquinone] 1 alpha subcomplex subunit 10, mitochondrial OS=Homo sapiens OX=9606 GN=NDUFA10 PE=1 SV=1	12	4	44.7	64.6	37.4	0.362514	0.327209	0.902611	-0.147824
High	Master Protein	Q02978	Mitochondrial 2-oxoglutarate/malate carrier protein OS=Homo sapiens OX=9606 GN=SLC25A11 PE=1 SV=3	13	4	34	87.4	50.6	0.49046	0.442695	0.902611	-0.147824
High	Master Protein	Q5SSJ5	Heterochromatin protein 1-binding protein 3 OS=Homo sapiens OX=9606 GN=HP1BP3 PE=1 SV=1	18	8	61.2	463.8	268.6	2.60269	2.34996	0.902894	-0.147372
High	Master Protein	P21589	5'-nucleotidase OS=Homo sapiens OX=9606 GN=NT5E PE=1 SV=1	36	19	63.3	1288.6	746.5	7.2312	6.53106	0.903178	-0.146918
High	Master Protein	D6W5Y5	Cold inducible RNA binding protein, isoform CRA_c OS=Homo sapiens OX=9606 GN=CIRBP PE=1 SV=1	10	3	31.9	110.6	64.1	0.620651	0.560805	0.903575	-0.146283
High	Master Protein	P23497	Nuclear autoantigen Sp-100 OS=Homo sapiens OX=9606 GN=SP100 PE=1 SV=3	6	5	100.4	162.7	94.3	0.913019	0.825022	0.90362	-0.146213
High	Master Protein	Q6IBS0	Twinfilin-2 OS=Homo sapiens OX=9606 GN=TWF2 PE=1 SV=2	20	5	39.5	554.2	321.3	3.10999	2.81102	0.903869	-0.145814
High	Master Protein	E7EMB3	Calmodulin-2 OS=Homo sapiens OX=9606 GN=CALM2 PE=1 SV=1	39	14	21.7	866.2	503.4	4.86083	4.4042	0.906059	-0.142323
High	Master Protein	D6RBR1	Calpastatin (Fragment) OS=Homo sapiens OX=9606 GN=CAST PE=1 SV=1	49	7	15.5	46.4	27	0.260382	0.23622	0.907209	-0.140493
High	Master Protein	Q16666	Gamma-interferon-inducible protein 16 OS=Homo sapiens OX=9606 GN=IFI16 PE=1 SV=3	11	9	88.2	391	227.7	2.19416	1.99213	0.90792	-0.139362
High	Master Protein	Q9H2D6	TRIO and F-actin-binding protein OS=Homo sapiens OX=9606 GN=TRIOBP PE=1 SV=3	1	3	261.2	12.7	7.4	0.0712682	0.0647419	0.908426	-0.138559
High	Master Protein	Q56VL3	OCIA domain-containing protein 2 OS=Homo sapiens OX=9606 GN=OCIAD2 PE=1 SV=1	19	3	16.9	179.8	105.1	1.00898	0.91951	0.911328	-0.133958
High	Master Protein	O60942	mRNA-capping enzyme OS=Homo sapiens OX=9606 GN=RNGTT PE=1 SV=1	4	2	68.5	22.2	13	0.124579	0.113736	0.91296	-0.131376
High	Master Protein	A0A0G2JH68	Protein diaphanous homolog 1 OS=Homo sapiens OX=9606 GN=DIAPH1 PE=1 SV=1	11	13	141.3	624.3	365.8	3.50337	3.20035	0.913507	-0.130512
High	Master Protein	Q96RU3	Formin-binding protein 1 OS=Homo sapiens OX=9606 GN=FNBP1 PE=1 SV=2	3	2	71.3	22.5	13.2	0.126263	0.115486	0.914646	-0.128715
High	Master Protein	P40123	Adenylyl cyclase-associated protein 2 OS=Homo sapiens OX=9606 GN=CAP2 PE=1 SV=1	9	4	52.8	79.9	46.9	0.448373	0.410324	0.91514	-0.127936
High	Master Protein	P63104	14-3-3 protein zeta/delta OS=Homo sapiens OX=9606 GN=YWHAZ PE=1 SV=1	69	21	27.7	860.1	505	4.8266	4.4182	0.915385	-0.127549
High	Master Protein	P05141	ADP/ATP translocase 2 OS=Homo sapiens OX=9606 GN=SLC25A5 PE=1 SV=7	32	12	32.8	161.5	94.9	0.906285	0.830271	0.916126	-0.126382
High	Master Protein	P10644	cAMP-dependent protein kinase type I-alpha regulatory subunit OS=Homo sapiens OX=9606 GN=PRKAR1A PE=1 SV=1	25	9	43	662.6	389.5	3.71829	3.4077	0.916468	-0.125843
High	Master Protein	P17096	High mobility group protein HMG-I/HMG-Y OS=Homo sapiens OX=9606 GN=HMGA1 PE=1 SV=3	22	3	11.7	500.5	295	2.80864	2.58093	0.918924	-0.121983
High	Master Protein	Q9BQ52	Zinc phosphodiesterase ELAC protein 2 OS=Homo sapiens OX=9606 GN=ELAC2 PE=1 SV=2	6	3	92.2	49.7	29.3	0.2789	0.256343	0.919121	-0.121673
High	Master Protein	P27797	Calreticulin OS=Homo sapiens OX=9606 GN=CALR PE=1 SV=1	42	14	48.1	1350.3	797.4	7.57744	6.97638	0.920677	-0.119233
High	Master Protein	Q13561	Dynactin subunit 2 OS=Homo sapiens OX=9606 GN=DCTN2 PE=1 SV=4	23	6	44.2	141.9	83.9	0.796296	0.734033	0.921809	-0.11746
High	Master Protein	P09104	Gamma-enolase OS=Homo sapiens OX=9606 GN=ENO2 PE=1 SV=3	15	5	47.2	76.4	45.2	0.428732	0.395451	0.922373	-0.116578
High	Master Protein	P23229	Integrin alpha-6 OS=Homo sapiens OX=9606 GN=ITGA6 PE=1 SV=5	12	12	126.5	727.7	430.6	4.08361	3.76728	0.922536	-0.116324
High	Master Protein	Q14126	Desmoglein-2 OS=Homo sapiens OX=9606 GN=DSG2 PE=1 SV=2	3	2	122.2	21.8	12.9	0.122334	0.112861	0.92256	-0.116285
High	Master Protein	Q9Y2D5	A-kinase anchor protein 2 OS=Homo sapiens OX=9606 GN=AKAP2 PE=1 SV=3	9	6	94.6	176.4	104.5	0.989899	0.914261	0.92359	-0.114676
High	Master Protein	P41252	Isoleucine--tRNA ligase, cytoplasmic OS=Homo sapiens OX=9606 GN=IARS PE=1 SV=2	15	15	144.4	456.6	270.8	2.56229	2.3692	0.924643	-0.113031
High	Master Protein	Q8IUW5	RELT-like protein 1 OS=Homo sapiens OX=9606 GN=RELL1 PE=1 SV=1	7	2	29.3	141.2	83.9	0.792368	0.734033	0.926379	-0.110325
High	Master Protein	P34949	Mannose-6-phosphate isomerase OS=Homo sapiens OX=9606 GN=MPI PE=1 SV=2	6	2	46.6	19.5	11.6	0.109428	0.101487	0.927438	-0.108677
High	Master Protein	O00487	26S proteasome non-ATPase regulatory subunit 14 OS=Homo sapiens OX=9606 GN=PSMD14 PE=1 SV=1	9	2	34.6	132.2	78.7	0.741863	0.688539	0.928121	-0.107615
High	Master Protein	P05362	Intercellular adhesion molecule 1 OS=Homo sapiens OX=9606 GN=ICAM1 PE=1 SV=2	14	6	57.8	109.6	65.3	0.615039	0.571304	0.92889	-0.106421
High	Master Protein	Q9UNW1	Multiple inositol polyphosphate phosphatase 1 OS=Homo sapiens OX=9606 GN=MINPP1 PE=1 SV=1	4	2	55	54.3	32.4	0.304714	0.283465	0.930265	-0.104286
High	Master Protein	E5RK69	Annexin OS=Homo sapiens OX=9606 GN=ANXA6 PE=1 SV=1	40	21	51.7	26.8	16	0.150393	0.139983	0.930779	-0.103489
High	Master Protein	Q13595	Transformer-2 protein homolog alpha OS=Homo sapiens OX=9606 GN=TRA2A PE=1 SV=1	11	3	32.7	135.8	81.2	0.762065	0.710411	0.932219	-0.10126
High	Master Protein	Q29RF7	Sister chromatid cohesion protein PDS5 homolog A OS=Homo sapiens OX=9606 GN=PDS5A PE=1 SV=1	4	4	150.7	46.8	28	0.262626	0.244969	0.932768	-0.10041
High	Master Protein	Q8TEX9	Importin-4 OS=Homo sapiens OX=9606 GN=IPO4 PE=1 SV=2	4	4	118.6	79.2	47.4	0.444444	0.414698	0.933071	-0.0999414
High	Master Protein	P0C0S5	Histone H2A.Z OS=Homo sapiens OX=9606 GN=H2AFZ PE=1 SV=2	26	4	13.5	551.7	330.2	3.09596	2.88889	0.933116	-0.0998719
High	Master Protein	Q9UNZ2	NSFL1 cofactor p47 OS=Homo sapiens OX=9606 GN=NSFL1C PE=1 SV=2	15	4	40.5	154.5	92.6	0.867003	0.810149	0.934424	-0.0978508
High	Master Protein	O94804	Serine/threonine-protein kinase 10 OS=Homo sapiens OX=9606 GN=STK10 PE=1 SV=1	6	6	112.1	202.5	121.4	1.13636	1.06212	0.934663	-0.0974816
High	Master Protein	Q3KQV9	UDP-N-acetylhexosamine pyrophosphorylase-like protein 1 OS=Homo sapiens OX=9606 GN=UAP1L1 PE=1 SV=2	6	3	57	215.4	129.2	1.20875	1.13036	0.935144	-0.0967402
High	Master Protein	O95239	Chromosome-associated kinesin KIF4A OS=Homo sapiens OX=9606 GN=KIF4A PE=1 SV=3	2	2	139.8	18.5	11.1	0.103816	0.0971129	0.935433	-0.0962937
High	Master Protein	O43324	Eukaryotic translation elongation factor 1 epsilon-1 OS=Homo sapiens OX=9606 GN=EEF1E1 PE=1 SV=1	22	4	19.8	438.4	263.4	2.46016	2.30446	0.936713	-0.0943205
High	Master Protein	Q14118	Dystroglycan OS=Homo sapiens OX=9606 GN=DAG1 PE=1 SV=2	5	4	97.4	103.4	62.2	0.580247	0.544182	0.937846	-0.0925778
High	Master Protein	Q00688	Peptidyl-prolyl cis-trans isomerase FKBP3 OS=Homo sapiens OX=9606 GN=FKBP3 PE=1 SV=1	10	2	25.2	215	129.4	1.20651	1.13211	0.938334	-0.0918271
High	Master Protein	H3BPE7	RNA-binding protein FUS OS=Homo sapiens OX=9606 GN=FUS PE=1 SV=1	12	8	53.5	503.4	303.5	2.82492	2.65529	0.939955	-0.0893368
High	Master Protein	O75976	Carboxypeptidase D OS=Homo sapiens OX=9606 GN=CPD PE=1 SV=2	1	2	152.8	52.5	31.8	0.294613	0.278215	0.944342	-0.0826187
High	Master Protein	P63000	Ras-related C3 botulinum toxin substrate 1 OS=Homo sapiens OX=9606 GN=RAC1 PE=1 SV=1	31	6	21.4	17	10.3	0.0953984	0.0901137	0.944604	-0.0822185
High	Master Protein	Q8NBI5	Solute carrier family 43 member 3 OS=Homo sapiens OX=9606 GN=SLC43A3 PE=1 SV=2	5	5	54.5	268.7	163.1	1.50786	1.42695	0.946341	-0.0795676
High	Master Protein	P27694	Replication protein A 70 kDa DNA-binding subunit OS=Homo sapiens OX=9606 GN=RPA1 PE=1 SV=2	21	11	68.1	707.1	430	3.96801	3.76203	0.948089	-0.0769057
High	Master Protein	Q96KP4	Cytosolic non-specific dipeptidase OS=Homo sapiens OX=9606 GN=CNDP2 PE=1 SV=2	31	11	52.8	773.4	471.7	4.34007	4.12686	0.950874	-0.0726732
High	Master Protein	Q8NFQ8	Torsin-1A-interacting protein 2 OS=Homo sapiens OX=9606 GN=TOR1AIP2 PE=1 SV=1	3	2	51.2	50	30.5	0.280584	0.266842	0.951024	-0.0724469
High	Master Protein	Q9BR76	Coronin-1B OS=Homo sapiens OX=9606 GN=CORO1B PE=1 SV=1	11	6	54.2	625.5	381.6	3.5101	3.33858	0.951136	-0.0722768
High	Master Protein	Q9NR12	PDZ and LIM domain protein 7 OS=Homo sapiens OX=9606 GN=PDLIM7 PE=1 SV=1	19	8	49.8	161.1	98.3	0.90404	0.860017	0.951304	-0.0720212
High	Master Protein	Q13564	NEDD8-activating enzyme E1 regulatory subunit OS=Homo sapiens OX=9606 GN=NAE1 PE=1 SV=1	4	2	60.2	444.9	271.5	2.49663	2.37533	0.951413	-0.071857
High	Master Protein	Q9Y305	Acyl-coenzyme A thioesterase 9, mitochondrial OS=Homo sapiens OX=9606 GN=ACOT9 PE=1 SV=2	13	6	49.9	403.3	246.6	2.26319	2.15748	0.953293	-0.0690087
High	Master Protein	O60869	Endothelial differentiation-related factor 1 OS=Homo sapiens OX=9606 GN=EDF1 PE=1 SV=1	31	4	16.4	232.1	142	1.30247	1.24234	0.953838	-0.0681837
High	Master Protein	Q2TAY7	WD40 repeat-containing protein SMU1 OS=Homo sapiens OX=9606 GN=SMU1 PE=1 SV=2	10	5	57.5	166.7	102.1	0.935466	0.893263	0.954886	-0.0665993
High	Master Protein	Q99584	Protein S100-A13 OS=Homo sapiens OX=9606 GN=S100A13 PE=1 SV=1	41	4	11.5	267.9	164.4	1.50337	1.43832	0.956733	-0.0638123
High	Master Protein	A0A0A0MTN0	Cullin-2 OS=Homo sapiens OX=9606 GN=CUL2 PE=1 SV=1	3	3	88.4	45.9	28.2	0.257576	0.246719	0.957851	-0.0621271
High	Master Protein	Q9UKG1	DCC-interacting protein 13-alpha OS=Homo sapiens OX=9606 GN=APPL1 PE=1 SV=1	4	2	79.6	13.5	8.3	0.0757576	0.0726159	0.95853	-0.0611042
High	Master Protein	P30043	Flavin reductase (NADPH) OS=Homo sapiens OX=9606 GN=BLVRB PE=1 SV=3	26	4	22.1	88.5	54.5	0.496633	0.476815	0.960096	-0.0587493
High	Master Protein	Q15785	Mitochondrial import receptor subunit TOM34 OS=Homo sapiens OX=9606 GN=TOMM34 PE=1 SV=2	17	5	34.5	250.7	154.4	1.40685	1.35083	0.960184	-0.0586173
High	Master Protein	P61006	Ras-related protein Rab-8A OS=Homo sapiens OX=9606 GN=RAB8A PE=1 SV=1	28	7	23.7	108.9	67.1	0.611111	0.587052	0.96063	-0.0579473
High	Master Protein	P06703	Protein S100-A6 OS=Homo sapiens OX=9606 GN=S100A6 PE=1 SV=1	24	5	10.2	874.7	539	4.90853	4.71566	0.960707	-0.0578311
High	Master Protein	P50281	Matrix metalloproteinase-14 OS=Homo sapiens OX=9606 GN=MMP14 PE=1 SV=3	7	4	65.9	400.7	247.4	2.2486	2.16448	0.962591	-0.0550051
High	Master Protein	Q01780	Exosome component 10 OS=Homo sapiens OX=9606 GN=EXOSC10 PE=1 SV=2	5	3	100.8	34	21	0.190797	0.183727	0.962946	-0.0544735
High	Master Protein	Q96PZ0	Pseudouridylate synthase 7 homolog OS=Homo sapiens OX=9606 GN=PUS7 PE=1 SV=2	3	2	75	33.5	20.7	0.187991	0.181102	0.963356	-0.0538584
High	Master Protein	Q9UJZ1	Stomatin-like protein 2, mitochondrial OS=Homo sapiens OX=9606 GN=STOML2 PE=1 SV=1	26	7	38.5	135.6	83.8	0.760943	0.733158	0.963487	-0.0536631
High	Master Protein	Q96S44	TP53-regulating kinase OS=Homo sapiens OX=9606 GN=TP53RK PE=1 SV=2	12	2	28.1	69.4	42.9	0.38945	0.375328	0.963739	-0.0532861
High	Master Protein	Q9NVZ3	Adaptin ear-binding coat-associated protein 2 OS=Homo sapiens OX=9606 GN=NECAP2 PE=1 SV=1	22	4	28.3	46.1	28.5	0.258698	0.249344	0.963841	-0.0531329
High	Master Protein	P06400	Retinoblastoma-associated protein OS=Homo sapiens OX=9606 GN=RB1 PE=1 SV=2	2	2	106.1	200	123.7	1.12233	1.08224	0.964276	-0.0524826
High	Master Protein	Q00059	Transcription factor A, mitochondrial OS=Homo sapiens OX=9606 GN=TFAM PE=1 SV=1	21	6	29.1	480.4	297.5	2.69585	2.6028	0.965485	-0.0506745
High	Master Protein	P17174	Aspartate aminotransferase, cytoplasmic OS=Homo sapiens OX=9606 GN=GOT1 PE=1 SV=3	13	5	46.2	94.4	58.5	0.529742	0.511811	0.966152	-0.0496783
High	Master Protein	Q9UNM6	26S proteasome non-ATPase regulatory subunit 13 OS=Homo sapiens OX=9606 GN=PSMD13 PE=1 SV=2	29	11	42.9	654.8	405.8	3.67452	3.55031	0.966195	-0.0496135
High	Master Protein	F8VXU5	Vacuolar protein sorting-associated protein 29 OS=Homo sapiens OX=9606 GN=VPS29 PE=1 SV=1	13	3	24	228.4	141.6	1.28171	1.23885	0.96656	-0.0490695
High	Master Protein	O43678	NADH dehydrogenase [ubiquinone] 1 alpha subcomplex subunit 2 OS=Homo sapiens OX=9606 GN=NDUFA2 PE=1 SV=3	29	2	10.9	20.6	12.8	0.1156	0.111986	0.968733	-0.0458286
High	Master Protein	Q06787	Synaptic functional regulator FMR1 OS=Homo sapiens OX=9606 GN=FMR1 PE=1 SV=1	6	3	71.1	14	8.7	0.0785634	0.0761155	0.968841	-0.0456676
High	Master Protein	Q15208	Serine/threonine-protein kinase 38 OS=Homo sapiens OX=9606 GN=STK38 PE=1 SV=1	5	2	54.2	136.6	84.9	0.766554	0.742782	0.968988	-0.0454491
High	Master Protein	Q9NQW7	Xaa-Pro aminopeptidase 1 OS=Homo sapiens OX=9606 GN=XPNPEP1 PE=1 SV=3	10	5	69.9	86.5	53.8	0.48541	0.470691	0.969678	-0.044422
High	Master Protein	Q9GZL7	Ribosome biogenesis protein WDR12 OS=Homo sapiens OX=9606 GN=WDR12 PE=1 SV=2	5	2	47.7	77.8	48.4	0.436588	0.423447	0.969901	-0.0440912
High	Master Protein	Q01105	Protein SET OS=Homo sapiens OX=9606 GN=SET PE=1 SV=3	18	5	33.5	191.4	119.1	1.07407	1.04199	0.970133	-0.0437455
High	Master Protein	Q10713	Mitochondrial-processing peptidase subunit alpha OS=Homo sapiens OX=9606 GN=PMPCA PE=1 SV=2	10	3	58.2	14.3	8.9	0.0802469	0.0778653	0.970321	-0.043466
High	Master Protein	O60749	Sorting nexin-2 OS=Homo sapiens OX=9606 GN=SNX2 PE=1 SV=2	17	7	58.4	126.9	79	0.712121	0.691164	0.97057	-0.0430956
High	Master Protein	P61457	Pterin-4-alpha-carbinolamine dehydratase OS=Homo sapiens OX=9606 GN=PCBD1 PE=1 SV=2	16	2	12	33.7	21	0.189113	0.183727	0.971518	-0.0416873
High	Master Protein	P46459	Vesicle-fusing ATPase OS=Homo sapiens OX=9606 GN=NSF PE=1 SV=3	15	10	82.5	294.9	183.9	1.65488	1.60892	0.972229	-0.0406324
High	Master Protein	Q92643	GPI-anchor transamidase OS=Homo sapiens OX=9606 GN=PIGK PE=1 SV=2	7	2	45.2	31.9	19.9	0.179012	0.174103	0.972577	-0.0401161
High	Master Protein	Q00796	Sorbitol dehydrogenase OS=Homo sapiens OX=9606 GN=SORD PE=1 SV=4	7	2	38.3	63.1	39.4	0.354097	0.344707	0.973483	-0.0387724
High	Master Protein	Q5SRE5	Nucleoporin NUP188 homolog OS=Homo sapiens OX=9606 GN=NUP188 PE=1 SV=1	2	3	195.9	286.6	179	1.60831	1.56605	0.973729	-0.0384071
High	Master Protein	P61225	Ras-related protein Rap-2b OS=Homo sapiens OX=9606 GN=RAP2B PE=1 SV=1	14	3	20.5	85.3	53.3	0.478676	0.466317	0.974181	-0.0377383
High	Master Protein	H3BQK0	ATP-dependent RNA helicase DDX19B OS=Homo sapiens OX=9606 GN=DDX19B PE=1 SV=1	4	2	54.5	106.7	66.8	0.598765	0.584427	0.976053	-0.0349682
High	Master Protein	A0A0A0MRI2	Sorting nexin OS=Homo sapiens OX=9606 GN=SNX6 PE=1 SV=1	6	3	47.8	277	173.5	1.55443	1.51794	0.97652	-0.0342784
High	Master Protein	Q9GZT9	Egl nine homolog 1 OS=Homo sapiens OX=9606 GN=EGLN1 PE=1 SV=1	8	2	46	25.7	16.1	0.14422	0.140857	0.976684	-0.0340357
High	Master Protein	Q9UBV2	Protein sel-1 homolog 1 OS=Homo sapiens OX=9606 GN=SEL1L PE=1 SV=3	8	5	88.7	28.4	17.8	0.159371	0.155731	0.977154	-0.0333418
High	Master Protein	Q92542	Nicastrin OS=Homo sapiens OX=9606 GN=NCSTN PE=1 SV=2	5	4	78.4	143.9	90.2	0.80752	0.789151	0.977253	-0.0331953
High	Master Protein	Q9UPT8	Zinc finger CCCH domain-containing protein 4 OS=Homo sapiens OX=9606 GN=ZC3H4 PE=1 SV=3	1	2	140.2	13.4	8.4	0.0751964	0.0734908	0.977318	-0.0330998
High	Master Protein	A0A1W2PQ51	Probable ATP-dependent RNA helicase DDX17 OS=Homo sapiens OX=9606 GN=DDX17 PE=1 SV=1	21	14	80.4	199	124.8	1.11672	1.09186	0.977739	-0.0324786
High	Master Protein	Q9NX40	OCIA domain-containing protein 1 OS=Homo sapiens OX=9606 GN=OCIAD1 PE=1 SV=1	4	2	27.6	136.4	85.6	0.765432	0.748906	0.97841	-0.031489
High	Master Protein	B1AKR6	Dynein light chain roadblock-type 1 OS=Homo sapiens OX=9606 GN=DYNLRB1 PE=1 SV=1	19	2	16.2	46.2	29	0.259259	0.253718	0.978628	-0.031168
High	Master Protein	Q96ST3	Paired amphipathic helix protein Sin3a OS=Homo sapiens OX=9606 GN=SIN3A PE=1 SV=2	3	3	145.1	102	64.1	0.572391	0.560805	0.979759	-0.029501
High	Master Protein	P00491	Purine nucleoside phosphorylase OS=Homo sapiens OX=9606 GN=PNP PE=1 SV=2	35	9	32.1	243.2	152.9	1.36476	1.33771	0.980179	-0.0288829
High	Master Protein	Q9Y2Q3	Glutathione S-transferase kappa 1 OS=Homo sapiens OX=9606 GN=GSTK1 PE=1 SV=3	24	4	25.5	213.9	134.5	1.20034	1.17673	0.980332	-0.0286584
High	Master Protein	Q8WXF1	Paraspeckle component 1 OS=Homo sapiens OX=9606 GN=PSPC1 PE=1 SV=1	17	8	58.7	269.4	169.4	1.51178	1.48206	0.980341	-0.028644
High	Master Protein	Q15691	Microtubule-associated protein RP/EB family member 1 OS=Homo sapiens OX=9606 GN=MAPRE1 PE=1 SV=3	35	9	30	1011.6	636.4	5.67677	5.5678	0.980805	-0.0279613
High	Master Protein	Q8NBQ5	Estradiol 17-beta-dehydrogenase 11 OS=Homo sapiens OX=9606 GN=HSD17B11 PE=1 SV=3	11	3	32.9	183.3	115.4	1.02862	1.00962	0.981533	-0.0268916
High	Master Protein	Q96HC4	PDZ and LIM domain protein 5 OS=Homo sapiens OX=9606 GN=PDLIM5 PE=1 SV=5	6	3	63.9	102.5	64.6	0.575196	0.565179	0.982585	-0.0253459
High	Master Protein	E7EQR4	Ezrin OS=Homo sapiens OX=9606 GN=EZR PE=1 SV=3	44	35	69.3	1899.7	1197.5	10.6605	10.4768	0.98277	-0.025074
High	Master Protein	Q99961	Endophilin-A2 OS=Homo sapiens OX=9606 GN=SH3GL1 PE=1 SV=1	7	2	41.5	72.8	45.9	0.40853	0.401575	0.982976	-0.0247724
High	Master Protein	Q16537	Serine/threonine-protein phosphatase 2A 56 kDa regulatory subunit epsilon isoform OS=Homo sapiens OX=9606 GN=PPP2R5E PE=1 SV=1	11	4	54.7	244.3	154.1	1.37093	1.34821	0.983424	-0.0241151
High	Master Protein	Q99447	Ethanolamine-phosphate cytidylyltransferase OS=Homo sapiens OX=9606 GN=PCYT2 PE=1 SV=1	18	6	43.8	284.7	179.7	1.59764	1.57218	0.984061	-0.0231802
High	Master Protein	P02545	Prelamin-A/C OS=Homo sapiens OX=9606 GN=LMNA PE=1 SV=1	61	45	74.1	4357.8	2753.3	24.4545	24.0884	0.985026	-0.0217662
High	Master Protein	O75843	AP-1 complex subunit gamma-like 2 OS=Homo sapiens OX=9606 GN=AP1G2 PE=1 SV=1	2	2	87.1	32.4	20.5	0.181818	0.179353	0.986439	-0.019698
High	Master Protein	P52789	Hexokinase-2 OS=Homo sapiens OX=9606 GN=HK2 PE=1 SV=2	12	11	102.3	286.2	181.1	1.60606	1.58443	0.98653	-0.0195652
High	Master Protein	P45877	Peptidyl-prolyl cis-trans isomerase C OS=Homo sapiens OX=9606 GN=PPIC PE=1 SV=1	10	2	22.7	225.8	142.9	1.26712	1.25022	0.986665	-0.0193676
High	Master Protein	P31942	Heterogeneous nuclear ribonucleoprotein H3 OS=Homo sapiens OX=9606 GN=HNRNPH3 PE=1 SV=2	27	9	36.9	300.9	190.7	1.68855	1.66842	0.988075	-0.0173073
High	Master Protein	P07203	Glutathione peroxidase 1 OS=Homo sapiens OX=9606 GN=GPX1 PE=1 SV=4	15	5	22.1	102.8	65.2	0.57688	0.570429	0.988817	-0.0162245
High	Master Protein	Q9NSV4	Protein diaphanous homolog 3 OS=Homo sapiens OX=9606 GN=DIAPH3 PE=1 SV=4	1	2	136.8	40.5	25.7	0.227273	0.224847	0.989326	-0.0154816
High	Master Protein	Q6VY07	Phosphofurin acidic cluster sorting protein 1 OS=Homo sapiens OX=9606 GN=PACS1 PE=1 SV=2	3	2	104.8	70.5	44.8	0.395623	0.391951	0.990719	-0.0134526
High	Master Protein	Q9H0R4	Haloacid dehalogenase-like hydrolase domain-containing protein 2 OS=Homo sapiens OX=9606 GN=HDHD2 PE=1 SV=1	8	2	28.5	94.4	60	0.529742	0.524934	0.990925	-0.0131524
High	Master Protein	Q9UFN0	Protein NipSnap homolog 3A OS=Homo sapiens OX=9606 GN=NIPSNAP3A PE=1 SV=2	10	2	28.4	17.3	11	0.0970819	0.096238	0.991307	-0.0125966
High	Master Protein	P78417	Glutathione S-transferase omega-1 OS=Homo sapiens OX=9606 GN=GSTO1 PE=1 SV=2	39	10	27.5	891.2	566.9	5.00112	4.95976	0.991728	-0.011983
High	Master Protein	P48637	Glutathione synthetase OS=Homo sapiens OX=9606 GN=GSS PE=1 SV=1	20	8	52.4	320	203.6	1.79574	1.78128	0.991949	-0.0116624
High	Master Protein	P04156	Major prion protein OS=Homo sapiens OX=9606 GN=PRNP PE=1 SV=1	9	2	27.6	19.8	12.6	0.111111	0.110236	0.992126	-0.0114048
High	Master Protein	Q96HN2	Adenosylhomocysteinase 3 OS=Homo sapiens OX=9606 GN=AHCYL2 PE=1 SV=1	7	4	66.7	254.2	161.8	1.42649	1.41557	0.992349	-0.0110805
High	Master Protein	O76003	Glutaredoxin-3 OS=Homo sapiens OX=9606 GN=GLRX3 PE=1 SV=2	10	4	37.4	164	104.4	0.920314	0.913386	0.992472	-0.0109022
High	Master Protein	O43809	Cleavage and polyadenylation specificity factor subunit 5 OS=Homo sapiens OX=9606 GN=NUDT21 PE=1 SV=1	33	7	26.2	475.4	302.9	2.66779	2.65004	0.993348	-0.00962839
High	Master Protein	P49589	Cysteine--tRNA ligase, cytoplasmic OS=Homo sapiens OX=9606 GN=CARS PE=1 SV=3	9	6	85.4	538.6	343.2	3.02245	3.00262	0.993442	-0.00949274
High	Master Protein	A2A274	Aconitate hydratase, mitochondrial OS=Homo sapiens OX=9606 GN=ACO2 PE=1 SV=1	11	7	87.8	225.5	143.7	1.26543	1.25722	0.993509	-0.00939544
High	Master Protein	Q92769	Histone deacetylase 2 OS=Homo sapiens OX=9606 GN=HDAC2 PE=1 SV=2	10	4	55.3	150.6	96	0.845118	0.839895	0.99382	-0.00894353
High	Master Protein	O75083	WD repeat-containing protein 1 OS=Homo sapiens OX=9606 GN=WDR1 PE=1 SV=4	37	18	66.2	1378.4	880.4	7.73513	7.70254	0.995787	-0.00609162
High	Master Protein	Q02218	2-oxoglutarate dehydrogenase, mitochondrial OS=Homo sapiens OX=9606 GN=OGDH PE=1 SV=3	18	15	115.9	405.4	259.3	2.27497	2.26859	0.997195	-0.00405195
High	Master Protein	Q9BXS5	AP-1 complex subunit mu-1 OS=Homo sapiens OX=9606 GN=AP1M1 PE=1 SV=3	9	3	48.6	148.8	95.2	0.835017	0.832896	0.99746	-0.00366911
High	Master Protein	P43304	Glycerol-3-phosphate dehydrogenase, mitochondrial OS=Homo sapiens OX=9606 GN=GPD2 PE=1 SV=3	15	11	80.8	421.3	269.6	2.3642	2.35871	0.997677	-0.00335549
High	Master Protein	Q08209	Serine/threonine-protein phosphatase 2B catalytic subunit alpha isoform OS=Homo sapiens OX=9606 GN=PPP3CA PE=1 SV=1	10	5	58.7	151.2	96.8	0.848485	0.846894	0.998125	-0.00270725
High	Master Protein	P04899	Guanine nucleotide-binding protein G(i) subunit alpha-2 OS=Homo sapiens OX=9606 GN=GNAI2 PE=1 SV=3	25	8	40.4	470	301	2.63749	2.63342	0.998459	-0.00222534
High	Master Protein	P84098	60S ribosomal protein L19 OS=Homo sapiens OX=9606 GN=RPL19 PE=1 SV=1	21	4	23.5	178.2	114.3	1	1	1	0
High	Master Protein	Q13409	Cytoplasmic dynein 1 intermediate chain 2 OS=Homo sapiens OX=9606 GN=DYNC1I2 PE=1 SV=3	20	11	71.4	674.3	432.6	3.78395	3.78478	1.00022	0.000315001
High	Master Protein	Q07812	Apoptosis regulator BAX OS=Homo sapiens OX=9606 GN=BAX PE=1 SV=1	27	5	21.2	146	93.7	0.819304	0.819773	1.00057	0.000824517
High	Master Protein	Q8WWC4	m-AAA protease-interacting protein 1, mitochondrial OS=Homo sapiens OX=9606 GN=MAIP1 PE=1 SV=1	8	2	32.5	48.3	31	0.271044	0.271216	1.00064	0.00091696
High	Master Protein	H3BN98	Uncharacterized protein (Fragment) OS=Homo sapiens OX=9606 PE=4 SV=2	22	6	27.2	43.6	28	0.244669	0.244969	1.00123	0.00177063
High	Master Protein	Q15599	Na(+)/H(+) exchange regulatory cofactor NHE-RF2 OS=Homo sapiens OX=9606 GN=SLC9A3R2 PE=1 SV=2	20	5	37.4	288.5	185.4	1.61897	1.62205	1.0019	0.00274186
High	Master Protein	Q99536	Synaptic vesicle membrane protein VAT-1 homolog OS=Homo sapiens OX=9606 GN=VAT1 PE=1 SV=2	32	9	41.9	450.7	289.8	2.52918	2.53543	1.00247	0.00356208
High	Master Protein	Q96B97	SH3 domain-containing kinase-binding protein 1 OS=Homo sapiens OX=9606 GN=SH3KBP1 PE=1 SV=2	7	3	73.1	90.5	58.2	0.507856	0.509186	1.00262	0.00377329
High	Master Protein	P08133	Annexin A6 OS=Homo sapiens OX=9606 GN=ANXA6 PE=1 SV=3	44	32	75.8	2554.9	1643.2	14.3373	14.3762	1.00272	0.0039132
High	Master Protein	O43264	Centromere/kinetochore protein zw10 homolog OS=Homo sapiens OX=9606 GN=ZW10 PE=1 SV=3	2	2	88.8	80.2	51.6	0.450056	0.451444	1.00308	0.00444076
High	Master Protein	Q9UQE7	Structural maintenance of chromosomes protein 3 OS=Homo sapiens OX=9606 GN=SMC3 PE=1 SV=2	15	16	141.5	480.7	309.3	2.69753	2.70604	1.00315	0.00454196
High	Master Protein	P31040	Succinate dehydrogenase [ubiquinone] flavoprotein subunit, mitochondrial OS=Homo sapiens OX=9606 GN=SDHA PE=1 SV=2	14	6	72.6	280.1	180.3	1.57183	1.57743	1.00356	0.00512935
High	Master Protein	G3V180	Dipeptidyl peptidase 3 OS=Homo sapiens OX=9606 GN=DPP3 PE=1 SV=1	19	10	84.3	345	222.1	1.93603	1.94313	1.00367	0.00528496
High	Master Protein	O75884	Putative hydrolase RBBP9 OS=Homo sapiens OX=9606 GN=RBBP9 PE=1 SV=2	6	2	21	25	16.1	0.140292	0.140857	1.00403	0.00580453
High	Master Protein	Q15363	Transmembrane emp24 domain-containing protein 2 OS=Homo sapiens OX=9606 GN=TMED2 PE=1 SV=1	21	5	22.7	205.9	132.6	1.15544	1.1601	1.00403	0.00580888
High	Master Protein	Q14558	Phosphoribosyl pyrophosphate synthase-associated protein 1 OS=Homo sapiens OX=9606 GN=PRPSAP1 PE=1 SV=2	7	2	39.4	35.4	22.8	0.198653	0.199475	1.00414	0.0059564
High	Master Protein	O60493	Sorting nexin-3 OS=Homo sapiens OX=9606 GN=SNX3 PE=1 SV=3	26	4	18.8	382	246.1	2.14366	2.15311	1.00441	0.00634395
High	Master Protein	P04040	Catalase OS=Homo sapiens OX=9606 GN=CAT PE=1 SV=3	13	6	59.7	113.7	73.3	0.638047	0.641295	1.00509	0.00732478
High	Master Protein	Q13838	Spliceosome RNA helicase DDX39B OS=Homo sapiens OX=9606 GN=DDX39B PE=1 SV=1	27	12	49	1055.2	680.4	5.92144	5.95276	1.00529	0.00761051
High	Master Protein	A0A087X020	Ribosome maturation protein SBDS OS=Homo sapiens OX=9606 GN=SBDS PE=1 SV=1	18	5	28.8	273.2	176.2	1.53311	1.54156	1.00551	0.00792837
High	Master Protein	Q14573	Inositol 1,4,5-trisphosphate receptor type 3 OS=Homo sapiens OX=9606 GN=ITPR3 PE=1 SV=2	5	12	303.9	397.5	256.4	2.23064	2.24322	1.00564	0.00811333
High	Master Protein	O75477	Erlin-1 OS=Homo sapiens OX=9606 GN=ERLIN1 PE=1 SV=1	19	6	38.9	195.9	126.4	1.09933	1.10586	1.00594	0.008551
High	Master Protein	P26640	Valine--tRNA ligase OS=Homo sapiens OX=9606 GN=VARS PE=1 SV=4	17	20	140.4	867.7	560.4	4.86925	4.90289	1.00691	0.00993256
High	Master Protein	P68371	Tubulin beta-4B chain OS=Homo sapiens OX=9606 GN=TUBB4B PE=1 SV=1	42	42	49.8	342	220.9	1.91919	1.93263	1.007	0.010069
High	Master Protein	Q07021	Complement component 1 Q subcomponent-binding protein, mitochondrial OS=Homo sapiens OX=9606 GN=C1QBP PE=1 SV=1	26	4	31.3	160.3	103.7	0.899551	0.907262	1.00857	0.0123134
High	Master Protein	Q96ND0	Protein FAM210A OS=Homo sapiens OX=9606 GN=FAM210A PE=1 SV=2	16	3	30.8	69.2	44.8	0.388328	0.391951	1.00933	0.0133986
High	Master Protein	P22676	Calretinin OS=Homo sapiens OX=9606 GN=CALB2 PE=2 SV=2	19	5	31.5	353.4	228.9	1.98316	2.00262	1.00981	0.0140874
High	Master Protein	P20339	Ras-related protein Rab-5A OS=Homo sapiens OX=9606 GN=RAB5A PE=1 SV=2	31	5	23.6	31.8	20.6	0.178451	0.180227	1.00995	0.0142895
High	Master Protein	P11498	Pyruvate carboxylase, mitochondrial OS=Homo sapiens OX=9606 GN=PC PE=1 SV=2	19	15	129.6	596.3	386.4	3.34624	3.38058	1.01026	0.0147287
High	Master Protein	O00170	AH receptor-interacting protein OS=Homo sapiens OX=9606 GN=AIP PE=1 SV=2	9	2	37.6	106.6	69.1	0.598204	0.604549	1.01061	0.0152221
High	Master Protein	Q9NR31	GTP-binding protein SAR1a OS=Homo sapiens OX=9606 GN=SAR1A PE=1 SV=1	20	4	22.4	238.7	154.8	1.33951	1.35433	1.01107	0.0158788
High	Master Protein	Q6FI81	Anamorsin OS=Homo sapiens OX=9606 GN=CIAPIN1 PE=1 SV=2	9	3	33.6	59.2	38.4	0.332211	0.335958	1.01128	0.0161811
High	Master Protein	P42892	Endothelin-converting enzyme 1 OS=Homo sapiens OX=9606 GN=ECE1 PE=1 SV=2	7	4	87.1	161.7	104.9	0.907407	0.91776	1.01141	0.0163669
High	Master Protein	Q08431	Lactadherin OS=Homo sapiens OX=9606 GN=MFGE8 PE=1 SV=2	9	3	43.1	149.9	97.3	0.84119	0.851269	1.01198	0.0171833
High	Master Protein	Q05682	Caldesmon OS=Homo sapiens OX=9606 GN=CALD1 PE=1 SV=3	20	15	93.2	643	417.4	3.60831	3.65179	1.01205	0.0172838
High	Master Protein	P15153	Ras-related C3 botulinum toxin substrate 2 OS=Homo sapiens OX=9606 GN=RAC2 PE=1 SV=1	31	6	21.4	596	387	3.34456	3.38583	1.01234	0.0176932
High	Master Protein	P46940	Ras GTPase-activating-like protein IQGAP1 OS=Homo sapiens OX=9606 GN=IQGAP1 PE=1 SV=1	42	65	189.1	4291.5	2786.7	24.0825	24.3806	1.01238	0.0177476
High	Master Protein	O15382	Branched-chain-amino-acid aminotransferase, mitochondrial OS=Homo sapiens OX=9606 GN=BCAT2 PE=1 SV=2	4	2	44.3	120.2	78.1	0.674523	0.68329	1.013	0.0186295
High	Master Protein	D6REX3	Protein transport protein Sec31A OS=Homo sapiens OX=9606 GN=SEC31A PE=1 SV=1	5	6	136.1	218.2	141.9	1.22447	1.24147	1.01389	0.0198954
High	Master Protein	Q8N1G2	Cap-specific mRNA (nucleoside-2'-O-)-methyltransferase 1 OS=Homo sapiens OX=9606 GN=CMTR1 PE=1 SV=1	2	2	95.3	24.6	16	0.138047	0.139983	1.01402	0.0200855
High	Master Protein	P84243	Histone H3.3 OS=Homo sapiens OX=9606 GN=H3F3A PE=1 SV=2	22	5	15.3	41.2	26.8	0.231201	0.234471	1.01414	0.0202606
High	Master Protein	H3BM74	NEDD8 ultimate buster 1 OS=Homo sapiens OX=9606 GN=NUB1 PE=1 SV=1	8	4	73.3	166.6	108.5	0.934905	0.949256	1.01535	0.0219786
High	Master Protein	O75436	Vacuolar protein sorting-associated protein 26A OS=Homo sapiens OX=9606 GN=VPS26A PE=1 SV=2	34	7	38.1	235.1	153.2	1.3193	1.34033	1.01594	0.0228137
High	Master Protein	P11172	Uridine 5'-monophosphate synthase OS=Homo sapiens OX=9606 GN=UMPS PE=1 SV=1	4	2	52.2	20.1	13.1	0.112795	0.114611	1.0161	0.0230432
High	Master Protein	P52306	Rap1 GTPase-GDP dissociation stimulator 1 OS=Homo sapiens OX=9606 GN=RAP1GDS1 PE=1 SV=3	3	2	66.3	74.7	48.7	0.419192	0.426072	1.01641	0.0234855
High	Master Protein	Q8WUF5	RelA-associated inhibitor OS=Homo sapiens OX=9606 GN=PPP1R13L PE=1 SV=4	7	4	89	27.3	17.8	0.153199	0.155731	1.01653	0.0236482
High	Master Protein	P16930	Fumarylacetoacetase OS=Homo sapiens OX=9606 GN=FAH PE=1 SV=2	8	3	46.3	101.5	66.2	0.569585	0.579178	1.01684	0.0240953
High	Master Protein	P52294	Importin subunit alpha-5 OS=Homo sapiens OX=9606 GN=KPNA1 PE=1 SV=3	12	5	60.2	162.9	106.3	0.914141	0.930009	1.01736	0.0248269
High	Master Protein	Q15286	Ras-related protein Rab-35 OS=Homo sapiens OX=9606 GN=RAB35 PE=1 SV=1	32	8	23	374	244.1	2.09877	2.13561	1.01755	0.025106
High	Master Protein	G5EA09	Syndecan binding protein (Syntenin), isoform CRA_a OS=Homo sapiens OX=9606 GN=SDCBP PE=1 SV=1	8	2	34.8	146	95.3	0.819304	0.833771	1.01766	0.0252517
High	Master Protein	Q9NZT2	Opioid growth factor receptor OS=Homo sapiens OX=9606 GN=OGFR PE=1 SV=3	10	6	73.3	130.3	85.1	0.731201	0.744532	1.01823	0.0260659
High	Master Protein	Q16658	Fascin OS=Homo sapiens OX=9606 GN=FSCN1 PE=1 SV=3	6	3	54.5	403.9	263.8	2.26655	2.30796	1.01827	0.0261184
High	Master Protein	P05387	60S acidic ribosomal protein P2 OS=Homo sapiens OX=9606 GN=RPLP2 PE=1 SV=1	53	4	11.7	86.8	56.7	0.487093	0.496063	1.01842	0.0263256
High	Master Protein	Q8IV08	Phospholipase D3 OS=Homo sapiens OX=9606 GN=PLD3 PE=1 SV=1	12	4	54.7	130.1	85	0.730079	0.743657	1.0186	0.0265857
High	Master Protein	P50570	Dynamin-2 OS=Homo sapiens OX=9606 GN=DNM2 PE=1 SV=2	14	11	98	669.3	437.8	3.75589	3.83027	1.0198	0.0282909
High	Master Protein	P50402	Emerin OS=Homo sapiens OX=9606 GN=EMD PE=1 SV=1	20	5	29	155.1	101.5	0.87037	0.888014	1.02027	0.028953
High	Master Protein	P61106	Ras-related protein Rab-14 OS=Homo sapiens OX=9606 GN=RAB14 PE=1 SV=4	28	7	23.9	396	259.2	2.22222	2.26772	1.02047	0.0292372
High	Master Protein	Q12905	Interleukin enhancer-binding factor 2 OS=Homo sapiens OX=9606 GN=ILF2 PE=1 SV=2	34	13	43	605.1	396.2	3.39562	3.46632	1.02082	0.0297272
High	Master Protein	P68036	Ubiquitin-conjugating enzyme E2 L3 OS=Homo sapiens OX=9606 GN=UBE2L3 PE=1 SV=1	34	4	17.9	397	260	2.22783	2.27472	1.02104	0.0300445
High	Master Protein	O14818	Proteasome subunit alpha type-7 OS=Homo sapiens OX=9606 GN=PSMA7 PE=1 SV=1	29	8	27.9	850.5	557.6	4.77273	4.87839	1.02214	0.0315913
High	Master Protein	O60488	Long-chain-fatty-acid--CoA ligase 4 OS=Homo sapiens OX=9606 GN=ACSL4 PE=1 SV=2	13	7	79.1	237.7	155.9	1.33389	1.36395	1.02254	0.032151
High	Master Protein	Q9NSE4	Isoleucine--tRNA ligase, mitochondrial OS=Homo sapiens OX=9606 GN=IARS2 PE=1 SV=2	8	7	113.7	478	313.7	2.68238	2.74453	1.02317	0.0330468
High	Master Protein	P42566	Epidermal growth factor receptor substrate 15 OS=Homo sapiens OX=9606 GN=EPS15 PE=1 SV=2	3	3	98.6	59.1	38.8	0.33165	0.339458	1.02354	0.0335705
High	Master Protein	A0A087WYS0	MICOS complex subunit MIC60 OS=Homo sapiens OX=9606 GN=IMMT PE=1 SV=1	26	7	40.5	131.1	86.1	0.73569	0.753281	1.02391	0.0340894
High	Master Protein	P14923	Junction plakoglobin OS=Homo sapiens OX=9606 GN=JUP PE=1 SV=3	2	2	81.7	129.8	85.3	0.728395	0.746282	1.02456	0.0349992
High	Master Protein	O15400	Syntaxin-7 OS=Homo sapiens OX=9606 GN=STX7 PE=1 SV=4	28	6	29.8	185.3	121.8	1.03984	1.06562	1.02479	0.0353232
High	Master Protein	O00116	Alkyldihydroxyacetonephosphate synthase, peroxisomal OS=Homo sapiens OX=9606 GN=AGPS PE=1 SV=1	14	6	72.9	162	106.5	0.909091	0.931759	1.02493	0.0355316
High	Master Protein	O14737	Programmed cell death protein 5 OS=Homo sapiens OX=9606 GN=PDCD5 PE=1 SV=3	37	4	14.3	268.8	176.9	1.50842	1.54768	1.02603	0.0370728
High	Master Protein	P54819	Adenylate kinase 2, mitochondrial OS=Homo sapiens OX=9606 GN=AK2 PE=1 SV=2	15	3	26.5	158.5	104.4	0.88945	0.913386	1.02691	0.0383108
High	Master Protein	Q7Z2W4	Zinc finger CCCH-type antiviral protein 1 OS=Homo sapiens OX=9606 GN=ZC3HAV1 PE=1 SV=3	10	7	101.4	54.8	36.1	0.30752	0.315836	1.02704	0.0384949
High	Master Protein	J3KNQ4	Alpha-parvin OS=Homo sapiens OX=9606 GN=PARVA PE=1 SV=1	9	3	46.6	21.4	14.1	0.12009	0.12336	1.02723	0.0387563
High	Master Protein	Q5TFE4	5'-nucleotidase domain-containing protein 1 OS=Homo sapiens OX=9606 GN=NT5DC1 PE=1 SV=1	16	5	51.8	139	91.6	0.780022	0.8014	1.02741	0.0390066
High	Master Protein	P51159	Ras-related protein Rab-27A OS=Homo sapiens OX=9606 GN=RAB27A PE=1 SV=3	9	2	24.9	78.3	51.6	0.439394	0.451444	1.02742	0.0390307
High	Master Protein	Q7Z5L9	Interferon regulatory factor 2-binding protein 2 OS=Homo sapiens OX=9606 GN=IRF2BP2 PE=1 SV=2	5	2	61	13.2	8.7	0.0740741	0.0761155	1.02756	0.0392213
High	Master Protein	Q8WXH0	Nesprin-2 OS=Homo sapiens OX=9606 GN=SYNE2 PE=1 SV=3	1	7	795.9	127.7	84.2	0.716611	0.736658	1.02798	0.0398055
High	Master Protein	P98175	RNA-binding protein 10 OS=Homo sapiens OX=9606 GN=RBM10 PE=1 SV=3	3	3	103.5	42.3	27.9	0.237374	0.244094	1.02831	0.0402794
High	Master Protein	Q15075	Early endosome antigen 1 OS=Homo sapiens OX=9606 GN=EEA1 PE=1 SV=2	6	8	162.4	110.2	72.7	0.618406	0.636045	1.02852	0.040575
High	Master Protein	Q15907	Ras-related protein Rab-11B OS=Homo sapiens OX=9606 GN=RAB11B PE=1 SV=4	39	9	24.5	696.2	459.4	3.90685	4.01925	1.02877	0.040921
High	Master Protein	P20020	Plasma membrane calcium-transporting ATPase 1 OS=Homo sapiens OX=9606 GN=ATP2B1 PE=1 SV=3	6	6	138.7	70.1	46.3	0.393378	0.405074	1.02973	0.0422697
High	Master Protein	Q96GG9	DCN1-like protein 1 OS=Homo sapiens OX=9606 GN=DCUN1D1 PE=1 SV=1	6	2	30.1	98.7	65.2	0.553872	0.570429	1.02989	0.0424938
High	Master Protein	E7EW20	Unconventional myosin-VI OS=Homo sapiens OX=9606 GN=MYO6 PE=1 SV=2	10	10	149.8	260.8	172.3	1.46352	1.50744	1.03	0.0426508
High	Master Protein	Q9Y5X1	Sorting nexin-9 OS=Homo sapiens OX=9606 GN=SNX9 PE=1 SV=1	11	5	66.6	152.1	100.5	0.853535	0.879265	1.03014	0.0428473
High	Master Protein	O60568	Procollagen-lysine,2-oxoglutarate 5-dioxygenase 3 OS=Homo sapiens OX=9606 GN=PLOD3 PE=1 SV=1	9	6	84.7	182.5	120.6	1.02413	1.05512	1.03026	0.0430054
High	Master Protein	P09525	Annexin A4 OS=Homo sapiens OX=9606 GN=ANXA4 PE=1 SV=4	41	15	35.9	674	445.4	3.78227	3.89676	1.03027	0.0430249
High	Master Protein	O14672	Disintegrin and metalloproteinase domain-containing protein 10 OS=Homo sapiens OX=9606 GN=ADAM10 PE=1 SV=1	5	3	84.1	45.7	30.2	0.256453	0.264217	1.03027	0.0430263
High	Master Protein	Q13885	Tubulin beta-2A chain OS=Homo sapiens OX=9606 GN=TUBB2A PE=1 SV=1	36	34	49.9	74.6	49.3	0.418631	0.431321	1.03031	0.0430839
High	Master Protein	P19367	Hexokinase-1 OS=Homo sapiens OX=9606 GN=HK1 PE=1 SV=3	22	18	102.4	717.4	474.2	4.02581	4.14873	1.03053	0.0433899
High	Master Protein	P56192	Methionine--tRNA ligase, cytoplasmic OS=Homo sapiens OX=9606 GN=MARS PE=1 SV=2	10	7	101.1	322.9	213.5	1.81201	1.86789	1.03084	0.0438206
High	Master Protein	P28074	Proteasome subunit beta type-5 OS=Homo sapiens OX=9606 GN=PSMB5 PE=1 SV=3	31	8	28.5	383	253.4	2.14927	2.21697	1.0315	0.0447441
High	Master Protein	P02765	Alpha-2-HS-glycoprotein OS=Homo sapiens OX=9606 GN=AHSG PE=1 SV=1	5	3	39.3	232.4	153.9	1.30415	1.34646	1.03244	0.0460551
High	Master Protein	Q92945	Far upstream element-binding protein 2 OS=Homo sapiens OX=9606 GN=KHSRP PE=1 SV=4	29	16	73.1	1226.6	812.5	6.88328	7.10849	1.03272	0.0464468
High	Master Protein	P34897	Serine hydroxymethyltransferase, mitochondrial OS=Homo sapiens OX=9606 GN=SHMT2 PE=1 SV=3	22	9	56	617.4	409	3.46465	3.5783	1.0328	0.0465673
High	Master Protein	Q8N766	ER membrane protein complex subunit 1 OS=Homo sapiens OX=9606 GN=EMC1 PE=1 SV=1	6	5	111.7	75.6	50.1	0.424242	0.43832	1.03318	0.0470963
High	Master Protein	O15355	Protein phosphatase 1G OS=Homo sapiens OX=9606 GN=PPM1G PE=1 SV=1	16	5	59.2	151.8	100.6	0.851852	0.88014	1.03321	0.0471304
High	Master Protein	Q5T6W2	Heterogeneous nuclear ribonucleoprotein K (Fragment) OS=Homo sapiens OX=9606 GN=HNRNPK PE=1 SV=1	55	20	41.8	59	39.2	0.331089	0.342957	1.03585	0.0508106
High	Master Protein	P22314	Ubiquitin-like modifier-activating enzyme 1 OS=Homo sapiens OX=9606 GN=UBA1 PE=1 SV=3	30	27	117.8	1224.6	813.9	6.87205	7.12073	1.03619	0.0512848
High	Master Protein	O94776	Metastasis-associated protein MTA2 OS=Homo sapiens OX=9606 GN=MTA2 PE=1 SV=1	14	9	75	487.9	324.3	2.73793	2.83727	1.03628	0.0514155
High	Master Protein	Q9Y6N5	Sulfide:quinone oxidoreductase, mitochondrial OS=Homo sapiens OX=9606 GN=SQOR PE=1 SV=1	21	8	49.9	305.7	203.3	1.71549	1.77865	1.03682	0.0521656
High	Master Protein	A0A087X0R6	Sorting nexin-12 OS=Homo sapiens OX=9606 GN=SNX12 PE=1 SV=1	13	3	19.8	96.5	64.2	0.541526	0.56168	1.03722	0.0527163
High	Master Protein	Q96A65	Exocyst complex component 4 OS=Homo sapiens OX=9606 GN=EXOC4 PE=1 SV=1	5	4	110.4	86.4	57.5	0.484848	0.503062	1.03757	0.0532026
High	Master Protein	O75955	Flotillin-1 OS=Homo sapiens OX=9606 GN=FLOT1 PE=1 SV=3	14	6	47.3	316.9	210.9	1.77834	1.84514	1.03757	0.0532034
High	Master Protein	Q9UKM9	RNA-binding protein Raly OS=Homo sapiens OX=9606 GN=RALY PE=1 SV=1	21	7	32.4	444.9	296.1	2.49663	2.59055	1.03762	0.0532753
High	Master Protein	O60271	C-Jun-amino-terminal kinase-interacting protein 4 OS=Homo sapiens OX=9606 GN=SPAG9 PE=1 SV=4	9	9	146.1	121.1	80.6	0.679574	0.705162	1.03765	0.0533248
High	Master Protein	H3BVG0	Nuclear pore complex protein Nup93 OS=Homo sapiens OX=9606 GN=NUP93 PE=1 SV=1	11	9	99.5	245.8	163.6	1.37935	1.43132	1.03768	0.0533598
High	Master Protein	Q99808	Equilibrative nucleoside transporter 1 OS=Homo sapiens OX=9606 GN=SLC29A1 PE=1 SV=3	5	2	50.2	107.8	71.8	0.604938	0.628171	1.03841	0.0543705
High	Master Protein	Q99816	Tumor susceptibility gene 101 protein OS=Homo sapiens OX=9606 GN=TSG101 PE=1 SV=2	11	3	43.9	101.9	67.9	0.571829	0.594051	1.03886	0.0550014
High	Master Protein	Q13618	Cullin-3 OS=Homo sapiens OX=9606 GN=CUL3 PE=1 SV=2	3	2	88.9	71.4	47.6	0.400673	0.416448	1.03937	0.0557094
High	Master Protein	O94919	Endonuclease domain-containing 1 protein OS=Homo sapiens OX=9606 GN=ENDOD1 PE=1 SV=2	5	2	55	46.5	31	0.260943	0.271216	1.03937	0.0557094
High	Master Protein	O75146	Huntingtin-interacting protein 1-related protein OS=Homo sapiens OX=9606 GN=HIP1R PE=1 SV=2	2	3	119.3	16.2	10.8	0.0909091	0.0944882	1.03937	0.0557094
High	Master Protein	A0A075B6F9	Nitric oxide synthase-interacting protein OS=Homo sapiens OX=9606 GN=NOSIP PE=1 SV=1	16	3	33.4	93.4	62.3	0.52413	0.545057	1.03993	0.0564815
High	Master Protein	P16949	Stathmin OS=Homo sapiens OX=9606 GN=STMN1 PE=1 SV=3	52	10	17.3	762.4	508.9	4.27834	4.45232	1.04067	0.057506
High	Master Protein	O15126	Secretory carrier-associated membrane protein 1 OS=Homo sapiens OX=9606 GN=SCAMP1 PE=1 SV=2	12	3	37.9	39.1	26.1	0.219416	0.228346	1.0407	0.0575531
High	Master Protein	P30101	Protein disulfide-isomerase A3 OS=Homo sapiens OX=9606 GN=PDIA3 PE=1 SV=4	46	20	56.7	1289.9	861.3	7.2385	7.53543	1.04102	0.0580004
High	Master Protein	Q13464	Rho-associated protein kinase 1 OS=Homo sapiens OX=9606 GN=ROCK1 PE=1 SV=1	2	2	158.1	23.8	15.9	0.133558	0.139108	1.04155	0.0587371
High	Master Protein	Q9NUQ8	ATP-binding cassette sub-family F member 3 OS=Homo sapiens OX=9606 GN=ABCF3 PE=1 SV=2	7	4	79.7	90.6	60.6	0.508418	0.530184	1.04281	0.0604787
High	Master Protein	P46926	Glucosamine-6-phosphate isomerase 1 OS=Homo sapiens OX=9606 GN=GNPDA1 PE=1 SV=1	17	5	32.6	229.6	153.6	1.28844	1.34383	1.04299	0.0607275
High	Master Protein	O94826	Mitochondrial import receptor subunit TOM70 OS=Homo sapiens OX=9606 GN=TOMM70 PE=1 SV=1	14	9	67.4	353.6	236.6	1.98429	2.06999	1.04319	0.0610037
High	Master Protein	P12235	ADP/ATP translocase 1 OS=Homo sapiens OX=9606 GN=SLC25A4 PE=1 SV=4	36	9	33	149.3	99.9	0.837823	0.874016	1.0432	0.0610144
High	Master Protein	Q13769	THO complex subunit 5 homolog OS=Homo sapiens OX=9606 GN=THOC5 PE=1 SV=2	2	2	78.5	226.5	151.6	1.27104	1.32633	1.0435	0.0614306
High	Master Protein	O75521	Enoyl-CoA delta isomerase 2, mitochondrial OS=Homo sapiens OX=9606 GN=ECI2 PE=1 SV=4	7	2	43.6	31.5	21.1	0.176768	0.184602	1.04432	0.0625631
High	Master Protein	P27708	CAD protein OS=Homo sapiens OX=9606 GN=CAD PE=1 SV=3	5	9	242.8	178.2	119.4	1	1.04462	1.04462	0.0629774
High	Master Protein	Q96P70	Importin-9 OS=Homo sapiens OX=9606 GN=IPO9 PE=1 SV=3	12	8	115.9	149.2	100.1	0.837262	0.875766	1.04599	0.0648664
High	Master Protein	P23141	Liver carboxylesterase 1 OS=Homo sapiens OX=9606 GN=CES1 PE=1 SV=2	11	6	62.5	279.2	187.4	1.56678	1.63955	1.04644	0.0654939
High	Master Protein	Q9Y5L4	Mitochondrial import inner membrane translocase subunit Tim13 OS=Homo sapiens OX=9606 GN=TIMM13 PE=1 SV=1	26	2	10.5	93	62.5	0.521886	0.546807	1.04775	0.0672974
High	Master Protein	Q92597	Protein NDRG1 OS=Homo sapiens OX=9606 GN=NDRG1 PE=1 SV=1	22	9	42.8	324.5	218.3	1.82099	1.90989	1.04882	0.0687656
High	Master Protein	Q9P2J5	Leucine--tRNA ligase, cytoplasmic OS=Homo sapiens OX=9606 GN=LARS PE=1 SV=2	10	10	134.4	565	380.2	3.17059	3.32633	1.04912	0.0691796
High	Master Protein	O75367	Core histone macro-H2A.1 OS=Homo sapiens OX=9606 GN=H2AFY PE=1 SV=4	28	8	39.6	537.1	361.5	3.01403	3.16273	1.04934	0.0694769
High	Master Protein	A0A087X1Z3	Proteasome activator complex subunit 2 OS=Homo sapiens OX=9606 GN=PSME2 PE=1 SV=1	23	7	29.1	395.2	266.1	2.21773	2.32808	1.04976	0.0700575
High	Master Protein	Q9BX40	Protein LSM14 homolog B OS=Homo sapiens OX=9606 GN=LSM14B PE=1 SV=1	9	2	42	62.8	42.3	0.352413	0.370079	1.05013	0.070565
High	Master Protein	Q96G03	Phosphoglucomutase-2 OS=Homo sapiens OX=9606 GN=PGM2 PE=1 SV=4	10	6	68.2	385.8	260	2.16498	2.27472	1.05069	0.0713304
High	Master Protein	A0A0A0MTJ9	Neutral cholesterol ester hydrolase 1 OS=Homo sapiens OX=9606 GN=NCEH1 PE=1 SV=1	13	5	49.9	201.9	136.1	1.133	1.19073	1.05095	0.0716981
High	Master Protein	A6NFX8	ADP-sugar pyrophosphatase OS=Homo sapiens OX=9606 GN=NUDT5 PE=1 SV=1	26	4	25.9	38.4	25.9	0.215488	0.226597	1.05155	0.0725177
High	Master Protein	P18206	Vinculin OS=Homo sapiens OX=9606 GN=VCL PE=1 SV=4	42	43	123.7	3409.2	2300.8	19.1313	20.1295	1.05217	0.0733743
High	Master Protein	O43707	Alpha-actinin-4 OS=Homo sapiens OX=9606 GN=ACTN4 PE=1 SV=2	59	64	104.8	6178.2	4171.7	34.67	36.4978	1.05272	0.0741208
High	Master Protein	P28066	Proteasome subunit alpha type-5 OS=Homo sapiens OX=9606 GN=PSMA5 PE=1 SV=3	39	7	26.4	388.4	262.3	2.17957	2.29484	1.05288	0.0743465
High	Master Protein	P26358	DNA (cytosine-5)-methyltransferase 1 OS=Homo sapiens OX=9606 GN=DNMT1 PE=1 SV=2	5	7	183.1	164.8	111.3	0.924804	0.973753	1.05293	0.0744093
High	Master Protein	Q07000	HLA class I histocompatibility antigen, Cw-15 alpha chain OS=Homo sapiens OX=9606 GN=HLA-C PE=1 SV=1	34	11	40.8	72.4	48.9	0.406285	0.427822	1.05301	0.0745167
High	Master Protein	F8W0W8	Serine/threonine-protein phosphatase OS=Homo sapiens OX=9606 GN=PPP1CC PE=1 SV=1	28	9	38.2	60.1	40.6	0.337262	0.355206	1.05321	0.0747867
High	Master Protein	P31350	Ribonucleoside-diphosphate reductase subunit M2 OS=Homo sapiens OX=9606 GN=RRM2 PE=1 SV=1	7	2	44.8	81.7	55.2	0.458474	0.48294	1.05336	0.0750041
High	Master Protein	A0A0C4DG89	Probable ATP-dependent RNA helicase DDX46 OS=Homo sapiens OX=9606 GN=DDX46 PE=1 SV=1	14	13	117.4	263.9	178.4	1.48092	1.5608	1.05394	0.0757962
High	Master Protein	Q09161	Nuclear cap-binding protein subunit 1 OS=Homo sapiens OX=9606 GN=NCBP1 PE=1 SV=1	10	7	91.8	326.8	221.1	1.83389	1.93438	1.0548	0.076963
High	Master Protein	P61204	ADP-ribosylation factor 3 OS=Homo sapiens OX=9606 GN=ARF3 PE=1 SV=2	28	7	20.6	389.6	263.6	2.18631	2.30621	1.05484	0.0770286
High	Master Protein	F8VYN9	ADP-ribosylation factor-like protein 1 OS=Homo sapiens OX=9606 GN=ARL1 PE=1 SV=1	10	2	21.8	192.4	130.2	1.07969	1.13911	1.05504	0.0772926
High	Master Protein	D6RBW1	Eukaryotic translation initiation factor 4E OS=Homo sapiens OX=9606 GN=EIF4E PE=1 SV=1	12	3	28.5	124.7	84.4	0.699776	0.738408	1.05521	0.0775254
High	Master Protein	P62070	Ras-related protein R-Ras2 OS=Homo sapiens OX=9606 GN=RRAS2 PE=1 SV=1	23	4	23.4	56.7	38.4	0.318182	0.335958	1.05587	0.0784295
High	Master Protein	F8W930	Insulin-like growth factor 2 mRNA-binding protein 2 OS=Homo sapiens OX=9606 GN=IGF2BP2 PE=1 SV=1	11	5	66.7	77	52.2	0.432099	0.456693	1.05692	0.0798633
High	Master Protein	P31949	Protein S100-A11 OS=Homo sapiens OX=9606 GN=S100A11 PE=1 SV=2	43	6	11.7	179.5	121.7	1.0073	1.06474	1.05703	0.0800173
High	Master Protein	P29590	Protein PML OS=Homo sapiens OX=9606 GN=PML PE=1 SV=3	8	6	97.5	237.5	161.1	1.33277	1.40945	1.05753	0.0807009
High	Master Protein	P55795	Heterogeneous nuclear ribonucleoprotein H2 OS=Homo sapiens OX=9606 GN=HNRNPH2 PE=1 SV=1	30	9	49.2	76.2	51.7	0.427609	0.452318	1.05778	0.0810452
High	Master Protein	P42765	3-ketoacyl-CoA thiolase, mitochondrial OS=Homo sapiens OX=9606 GN=ACAA2 PE=1 SV=2	16	5	41.9	101.4	68.8	0.569024	0.601925	1.05782	0.0810948
High	Master Protein	Q93009	Ubiquitin carboxyl-terminal hydrolase 7 OS=Homo sapiens OX=9606 GN=USP7 PE=1 SV=2	3	3	128.2	137.2	93.1	0.769921	0.814523	1.05793	0.0812445
High	Master Protein	A0A1B0GTU4	Paxillin OS=Homo sapiens OX=9606 GN=PXN PE=1 SV=1	3	3	115.8	66	44.8	0.37037	0.391951	1.05827	0.0817046
High	Master Protein	P17655	Calpain-2 catalytic subunit OS=Homo sapiens OX=9606 GN=CAPN2 PE=1 SV=6	23	15	79.9	523.8	355.7	2.93939	3.11199	1.05872	0.0823168
High	Master Protein	A8MU27	Small ubiquitin-related modifier 3 OS=Homo sapiens OX=9606 GN=SUMO3 PE=1 SV=1	14	2	16.9	350.1	237.8	1.96465	2.08049	1.05896	0.0826536
High	Master Protein	P49406	39S ribosomal protein L19, mitochondrial OS=Homo sapiens OX=9606 GN=MRPL19 PE=1 SV=2	9	2	33.5	62.7	42.6	0.351852	0.372703	1.05926	0.0830599
High	Master Protein	Q96BR5	Cytochrome c oxidase assembly factor 7 OS=Homo sapiens OX=9606 GN=COA7 PE=1 SV=2	7	2	25.7	40	27.2	0.224467	0.23797	1.06016	0.0842786
High	Master Protein	P49915	GMP synthase [glutamine-hydrolyzing] OS=Homo sapiens OX=9606 GN=GMPS PE=1 SV=1	15	10	76.7	538.4	366.2	3.02132	3.20385	1.06041	0.0846253
High	Master Protein	P00387	NADH-cytochrome b5 reductase 3 OS=Homo sapiens OX=9606 GN=CYB5R3 PE=1 SV=3	18	5	34.2	179.5	122.1	1.0073	1.06824	1.0605	0.0847513
High	Master Protein	Q9Y696	Chloride intracellular channel protein 4 OS=Homo sapiens OX=9606 GN=CLIC4 PE=1 SV=4	25	4	28.8	305.4	207.8	1.7138	1.81802	1.06081	0.0851675
High	Master Protein	U3KQ56	Glyoxylate reductase/hydroxypyruvate reductase OS=Homo sapiens OX=9606 GN=GRHPR PE=1 SV=1	22	5	38.7	210	143	1.17845	1.25109	1.06164	0.0862978
High	Master Protein	O75937	DnaJ homolog subfamily C member 8 OS=Homo sapiens OX=9606 GN=DNAJC8 PE=1 SV=2	17	4	29.8	291.6	198.8	1.63636	1.73928	1.06289	0.087999
High	Master Protein	P12814	Alpha-actinin-1 OS=Homo sapiens OX=9606 GN=ACTN1 PE=1 SV=2	61	58	103	2470.9	1684.7	13.8659	14.7393	1.06299	0.088127
High	Master Protein	Q7Z4V5	Hepatoma-derived growth factor-related protein 2 OS=Homo sapiens OX=9606 GN=HDGFL2 PE=1 SV=1	5	4	74.3	102.5	69.9	0.575196	0.611549	1.0632	0.0884124
High	Master Protein	O95336	6-phosphogluconolactonase OS=Homo sapiens OX=9606 GN=PGLS PE=1 SV=2	26	5	27.5	97.8	66.7	0.548822	0.583552	1.06328	0.0885242
High	Master Protein	P51659	Peroxisomal multifunctional enzyme type 2 OS=Homo sapiens OX=9606 GN=HSD17B4 PE=1 SV=3	8	5	79.6	136.5	93.1	0.765993	0.814523	1.06336	0.0886241
High	Master Protein	Q96C36	Pyrroline-5-carboxylate reductase 2 OS=Homo sapiens OX=9606 GN=PYCR2 PE=1 SV=1	20	5	33.6	197.9	135	1.11055	1.1811	1.06353	0.0888597
High	Master Protein	Q6YN16	Hydroxysteroid dehydrogenase-like protein 2 OS=Homo sapiens OX=9606 GN=HSDL2 PE=1 SV=1	9	4	45.4	380.3	259.7	2.13412	2.27209	1.06465	0.09038
High	Master Protein	Q06323	Proteasome activator complex subunit 1 OS=Homo sapiens OX=9606 GN=PSME1 PE=1 SV=1	51	12	28.7	1104.2	754.4	6.19641	6.60017	1.06516	0.091072
High	Master Protein	P13073	Cytochrome c oxidase subunit 4 isoform 1, mitochondrial OS=Homo sapiens OX=9606 GN=COX4I1 PE=1 SV=1	31	6	19.6	468.8	320.3	2.63075	2.80227	1.0652	0.0911232
High	Master Protein	Q13283	Ras GTPase-activating protein-binding protein 1 OS=Homo sapiens OX=9606 GN=G3BP1 PE=1 SV=1	24	9	52.1	347.9	237.9	1.9523	2.08136	1.06611	0.0923545
High	Master Protein	G3V1L9	Tight junction protein 1 (Zona occludens 1), isoform CRA_a OS=Homo sapiens OX=9606 GN=TJP1 PE=1 SV=1	3	4	197.3	29.1	19.9	0.1633	0.174103	1.06616	0.0924212
High	Master Protein	E7EPK1	Septin-7 OS=Homo sapiens OX=9606 GN=SEPT7 PE=1 SV=2	28	12	50.7	717	490.4	4.02357	4.29046	1.06633	0.0926578
High	Master Protein	P36404	ADP-ribosylation factor-like protein 2 OS=Homo sapiens OX=9606 GN=ARL2 PE=1 SV=4	11	2	20.9	105.9	72.5	0.594276	0.634296	1.06734	0.0940222
High	Master Protein	O75153	Clustered mitochondria protein homolog OS=Homo sapiens OX=9606 GN=CLUH PE=1 SV=2	1	2	146.6	82.2	56.3	0.461279	0.492563	1.06782	0.0946685
High	Master Protein	P47897	Glutamine--tRNA ligase OS=Homo sapiens OX=9606 GN=QARS PE=1 SV=1	24	16	87.7	756.6	518.6	4.24579	4.53718	1.06863	0.0957634
High	Master Protein	Q9Y520	Protein PRRC2C OS=Homo sapiens OX=9606 GN=PRRC2C PE=1 SV=4	3	7	316.7	168.9	115.8	0.947811	1.01312	1.06891	0.0961379
High	Master Protein	Q8N7H5	RNA polymerase II-associated factor 1 homolog OS=Homo sapiens OX=9606 GN=PAF1 PE=1 SV=2	6	3	59.9	98.7	67.7	0.553872	0.592301	1.06938	0.0967777
High	Master Protein	B7ZC38	Endophilin-B2 OS=Homo sapiens OX=9606 GN=SH3GLB2 PE=1 SV=1	9	3	44.3	127.8	87.7	0.717172	0.767279	1.06987	0.0974328
High	Master Protein	A0A0D9SF54	Spectrin alpha chain, non-erythrocytic 1 OS=Homo sapiens OX=9606 GN=SPTAN1 PE=1 SV=1	38	79	282.7	56.1	38.5	0.314815	0.336833	1.06994	0.0975296
High	Master Protein	P04080	Cystatin-B OS=Homo sapiens OX=9606 GN=CSTB PE=1 SV=2	52	4	11.1	316.3	217.2	1.77497	1.90026	1.07059	0.0984025
High	Master Protein	P61803	Dolichyl-diphosphooligosaccharide--protein glycosyltransferase subunit DAD1 OS=Homo sapiens OX=9606 GN=DAD1 PE=1 SV=3	19	2	12.5	96.8	66.5	0.54321	0.581802	1.07105	0.0990192
High	Master Protein	Q9Y277	Voltage-dependent anion-selective channel protein 3 OS=Homo sapiens OX=9606 GN=VDAC3 PE=1 SV=1	35	9	30.6	313.5	215.4	1.75926	1.88451	1.0712	0.0992247
High	Master Protein	Q8N806	Putative E3 ubiquitin-protein ligase UBR7 OS=Homo sapiens OX=9606 GN=UBR7 PE=1 SV=2	4	2	48	19.5	13.4	0.109428	0.117235	1.07135	0.0994308
High	Master Protein	O00264	Membrane-associated progesterone receptor component 1 OS=Homo sapiens OX=9606 GN=PGRMC1 PE=1 SV=3	28	4	21.7	61.4	42.2	0.344557	0.369204	1.07153	0.0996763
High	Master Protein	Q99459	Cell division cycle 5-like protein OS=Homo sapiens OX=9606 GN=CDC5L PE=1 SV=2	8	4	92.2	145.9	100.3	0.818743	0.877515	1.07178	0.100014
High	Master Protein	Q9Y371	Endophilin-B1 OS=Homo sapiens OX=9606 GN=SH3GLB1 PE=1 SV=1	10	4	40.8	184	126.5	1.03255	1.10674	1.07185	0.100104
High	Master Protein	Q7L576	Cytoplasmic FMR1-interacting protein 1 OS=Homo sapiens OX=9606 GN=CYFIP1 PE=1 SV=1	8	8	145.1	364.3	250.5	2.04433	2.1916	1.07204	0.100356
High	Master Protein	Q9Y287	Integral membrane protein 2B OS=Homo sapiens OX=9606 GN=ITM2B PE=1 SV=1	24	4	30.3	133.5	91.9	0.749158	0.804024	1.07324	0.101969
High	Master Protein	C9JIF9	Acylamino-acid-releasing enzyme OS=Homo sapiens OX=9606 GN=APEH PE=1 SV=1	8	5	81.6	90.5	62.3	0.507856	0.545057	1.07325	0.101986
High	Master Protein	P28072	Proteasome subunit beta type-6 OS=Homo sapiens OX=9606 GN=PSMB6 PE=1 SV=4	12	3	25.3	186.8	128.6	1.04826	1.12511	1.07331	0.102068
High	Master Protein	O14777	Kinetochore protein NDC80 homolog OS=Homo sapiens OX=9606 GN=NDC80 PE=1 SV=1	6	4	73.9	97.9	67.4	0.549383	0.589676	1.07334	0.102112
High	Master Protein	P61970	Nuclear transport factor 2 OS=Homo sapiens OX=9606 GN=NUTF2 PE=1 SV=1	24	3	14.5	33.4	23	0.18743	0.201225	1.0736	0.102458
High	Master Protein	Q15029	116 kDa U5 small nuclear ribonucleoprotein component OS=Homo sapiens OX=9606 GN=EFTUD2 PE=1 SV=1	11	9	109.4	471.5	324.7	2.6459	2.84077	1.07365	0.102522
High	Master Protein	Q6PKG0	La-related protein 1 OS=Homo sapiens OX=9606 GN=LARP1 PE=1 SV=2	4	5	123.4	80.3	55.3	0.450617	0.483815	1.07367	0.102551
High	Master Protein	O00159	Unconventional myosin-Ic OS=Homo sapiens OX=9606 GN=MYO1C PE=1 SV=4	20	16	121.6	408.8	281.6	2.29405	2.46369	1.07395	0.102924
High	Master Protein	A0A087WUB9	Beta-catenin-like protein 1 OS=Homo sapiens OX=9606 GN=CTNNBL1 PE=1 SV=1	4	2	65.7	118.4	81.6	0.664422	0.713911	1.07448	0.103644
High	Master Protein	Q9NZM1	Myoferlin OS=Homo sapiens OX=9606 GN=MYOF PE=1 SV=1	37	71	234.6	4313.1	2972.6	24.2037	26.007	1.0745	0.103672
High	Master Protein	P37837	Transaldolase OS=Homo sapiens OX=9606 GN=TALDO1 PE=1 SV=2	47	18	37.5	3124.3	2153.5	17.5325	18.8408	1.07462	0.103822
High	Master Protein	P13928	Annexin A8 OS=Homo sapiens OX=9606 GN=ANXA8 PE=1 SV=3	10	3	36.9	100.1	69	0.561728	0.603675	1.07467	0.103898
High	Master Protein	Q15645	Pachytene checkpoint protein 2 homolog OS=Homo sapiens OX=9606 GN=TRIP13 PE=1 SV=2	5	2	48.5	42.5	29.3	0.238496	0.256343	1.07483	0.10411
High	Master Protein	O95865	N(G),N(G)-dimethylarginine dimethylaminohydrolase 2 OS=Homo sapiens OX=9606 GN=DDAH2 PE=1 SV=1	26	6	29.6	158.6	109.4	0.890011	0.95713	1.07541	0.104892
High	Master Protein	P63313	Thymosin beta-10 OS=Homo sapiens OX=9606 GN=TMSB10 PE=1 SV=2	18	2	5	87.4	60.3	0.49046	0.527559	1.07564	0.105197
High	Master Protein	P62330	ADP-ribosylation factor 6 OS=Homo sapiens OX=9606 GN=ARF6 PE=1 SV=2	38	7	20.1	329.2	227.2	1.84736	1.98775	1.07599	0.10567
High	Master Protein	O43491	Band 4.1-like protein 2 OS=Homo sapiens OX=9606 GN=EPB41L2 PE=1 SV=1	9	7	112.5	118.5	81.8	0.664983	0.715661	1.07621	0.105958
High	Master Protein	Q9NR30	Nucleolar RNA helicase 2 OS=Homo sapiens OX=9606 GN=DDX21 PE=1 SV=5	16	10	87.3	386.6	266.9	2.16947	2.33508	1.07634	0.10613
High	Master Protein	Q9NQC3	Reticulon-4 OS=Homo sapiens OX=9606 GN=RTN4 PE=1 SV=2	11	8	129.9	410.9	283.7	2.30584	2.48206	1.07643	0.106251
High	Master Protein	Q9Y230	RuvB-like 2 OS=Homo sapiens OX=9606 GN=RUVBL2 PE=1 SV=3	28	11	51.1	602.2	415.9	3.37935	3.63867	1.07674	0.106666
High	Master Protein	Q15008	26S proteasome non-ATPase regulatory subunit 6 OS=Homo sapiens OX=9606 GN=PSMD6 PE=1 SV=1	25	10	45.5	511.7	353.4	2.87149	3.09186	1.07674	0.106676
High	Master Protein	Q9UDT6	CAP-Gly domain-containing linker protein 2 OS=Homo sapiens OX=9606 GN=CLIP2 PE=1 SV=1	2	2	115.8	109.6	75.7	0.615039	0.662292	1.07683	0.106789
High	Master Protein	P55786	Puromycin-sensitive aminopeptidase OS=Homo sapiens OX=9606 GN=NPEPPS PE=1 SV=2	16	13	103.2	1154.6	797.8	6.47924	6.97988	1.07727	0.107378
High	Master Protein	Q07960	Rho GTPase-activating protein 1 OS=Homo sapiens OX=9606 GN=ARHGAP1 PE=1 SV=1	13	5	50.4	179.8	124.3	1.00898	1.08749	1.07781	0.108105
High	Master Protein	Q68EM7	Rho GTPase-activating protein 17 OS=Homo sapiens OX=9606 GN=ARHGAP17 PE=1 SV=1	3	2	95.4	43.1	29.8	0.241863	0.260717	1.07795	0.108296
High	Master Protein	Q9NZJ9	Diphosphoinositol polyphosphate phosphohydrolase 2 OS=Homo sapiens OX=9606 GN=NUDT4 PE=1 SV=2	11	2	20.3	53.2	36.8	0.298541	0.32196	1.07844	0.108951
High	Master Protein	Q9H845	Acyl-CoA dehydrogenase family member 9, mitochondrial OS=Homo sapiens OX=9606 GN=ACAD9 PE=1 SV=1	3	2	68.7	70.8	49	0.397306	0.428696	1.07901	0.109704
High	Master Protein	Q15366	Poly(rC)-binding protein 2 OS=Homo sapiens OX=9606 GN=PCBP2 PE=1 SV=1	25	9	38.6	412.8	285.8	2.3165	2.50044	1.0794	0.110235
High	Master Protein	P40925	Malate dehydrogenase, cytoplasmic OS=Homo sapiens OX=9606 GN=MDH1 PE=1 SV=4	35	11	36.4	959.9	664.7	5.38664	5.8154	1.0796	0.110491
High	Master Protein	P10301	Ras-related protein R-Ras OS=Homo sapiens OX=9606 GN=RRAS PE=1 SV=1	21	4	23.5	82.3	57	0.461841	0.498688	1.07978	0.110741
High	Master Protein	Q8TC12	Retinol dehydrogenase 11 OS=Homo sapiens OX=9606 GN=RDH11 PE=1 SV=2	19	5	35.4	88.5	61.3	0.496633	0.536308	1.07989	0.110882
High	Master Protein	P18754	Regulator of chromosome condensation OS=Homo sapiens OX=9606 GN=RCC1 PE=1 SV=1	16	5	44.9	171.9	119.1	0.964646	1.04199	1.08018	0.111276
High	Master Protein	P55036	26S proteasome non-ATPase regulatory subunit 4 OS=Homo sapiens OX=9606 GN=PSMD4 PE=1 SV=1	23	7	40.7	441.2	305.9	2.47587	2.67629	1.08095	0.112299
High	Master Protein	Q5T4U5	Acyl-Coenzyme A dehydrogenase, C-4 to C-12 straight chain, isoform CRA_a OS=Homo sapiens OX=9606 GN=ACADM PE=1 SV=1	6	2	50.2	65.9	45.7	0.369809	0.399825	1.08117	0.112588
High	Master Protein	P09382	Galectin-1 OS=Homo sapiens OX=9606 GN=LGALS1 PE=1 SV=2	72	9	14.7	1038.2	720.4	5.82604	6.30271	1.08182	0.113458
High	Master Protein	O43684	Mitotic checkpoint protein BUB3 OS=Homo sapiens OX=9606 GN=BUB3 PE=1 SV=1	13	4	37.1	321.8	223.3	1.80584	1.95363	1.08184	0.113491
High	Master Protein	P14868	Aspartate--tRNA ligase, cytoplasmic OS=Homo sapiens OX=9606 GN=DARS PE=1 SV=2	46	21	57.1	1220.3	847.3	6.84792	7.41295	1.08251	0.114381
High	Master Protein	O00232	26S proteasome non-ATPase regulatory subunit 12 OS=Homo sapiens OX=9606 GN=PSMD12 PE=1 SV=3	33	13	52.9	677.2	470.3	3.80022	4.11461	1.08273	0.114671
High	Master Protein	Q9UJS0	Calcium-binding mitochondrial carrier protein Aralar2 OS=Homo sapiens OX=9606 GN=SLC25A13 PE=1 SV=2	14	7	74.1	239.8	166.7	1.34568	1.45844	1.0838	0.116094
High	Master Protein	P30876	DNA-directed RNA polymerase II subunit RPB2 OS=Homo sapiens OX=9606 GN=POLR2B PE=1 SV=1	2	2	133.8	76.5	53.2	0.429293	0.465442	1.08421	0.116638
High	Master Protein	P46821	Microtubule-associated protein 1B OS=Homo sapiens OX=9606 GN=MAP1B PE=1 SV=2	17	32	270.5	1175.5	818	6.59652	7.15661	1.08491	0.11757
High	Master Protein	P62195	26S proteasome regulatory subunit 8 OS=Homo sapiens OX=9606 GN=PSMC5 PE=1 SV=1	31	14	45.6	786	547	4.41077	4.78565	1.08499	0.117683
High	Master Protein	Q5T6V5	Queuosine salvage protein OS=Homo sapiens OX=9606 GN=C9orf64 PE=1 SV=1	6	2	39	156.5	109	0.878227	0.953631	1.08586	0.118837
High	Master Protein	Q969Q0	60S ribosomal protein L36a-like OS=Homo sapiens OX=9606 GN=RPL36AL PE=1 SV=3	24	3	12.5	49.8	34.7	0.279461	0.303587	1.08633	0.119462
High	Master Protein	Q96RS6	NudC domain-containing protein 1 OS=Homo sapiens OX=9606 GN=NUDCD1 PE=1 SV=2	12	5	66.7	315.3	219.7	1.76936	1.92213	1.08634	0.119482
High	Master Protein	P21291	Cysteine and glycine-rich protein 1 OS=Homo sapiens OX=9606 GN=CSRP1 PE=1 SV=3	42	6	20.6	285	198.6	1.59933	1.73753	1.08642	0.119576
High	Master Protein	Q5TH30	NDRG family member 3, isoform CRA_c OS=Homo sapiens OX=9606 GN=NDRG3 PE=1 SV=1	6	2	42.8	66	46	0.37037	0.40245	1.08661	0.11984
High	Master Protein	P19525	Interferon-induced, double-stranded RNA-activated protein kinase OS=Homo sapiens OX=9606 GN=EIF2AK2 PE=1 SV=2	6	3	62.1	141.6	98.7	0.794613	0.863517	1.08671	0.119973
High	Master Protein	P23396	40S ribosomal protein S3 OS=Homo sapiens OX=9606 GN=RPS3 PE=1 SV=2	66	18	26.7	1529.2	1066	8.58137	9.32633	1.08681	0.120102
High	Master Protein	P05067	Amyloid-beta A4 protein OS=Homo sapiens OX=9606 GN=APP PE=1 SV=3	3	2	86.9	77	53.7	0.432099	0.469816	1.08729	0.120736
High	Master Protein	O00442	RNA 3'-terminal phosphate cyclase OS=Homo sapiens OX=9606 GN=RTCA PE=1 SV=1	6	2	39.3	104.2	72.7	0.584736	0.636045	1.08775	0.121344
High	Master Protein	O60437	Periplakin OS=Homo sapiens OX=9606 GN=PPL PE=1 SV=4	1	2	204.6	32.1	22.4	0.180135	0.195976	1.08794	0.121597
High	Master Protein	P63010	AP-2 complex subunit beta OS=Homo sapiens OX=9606 GN=AP2B1 PE=1 SV=1	21	18	104.5	740.8	517	4.15713	4.52318	1.08806	0.121752
High	Master Protein	P30044	Peroxiredoxin-5, mitochondrial OS=Homo sapiens OX=9606 GN=PRDX5 PE=1 SV=4	47	8	22.1	485.7	339.1	2.72559	2.96675	1.08848	0.122317
High	Master Protein	A0A1C7CYX9	Dihydropyrimidinase-related protein 2 OS=Homo sapiens OX=9606 GN=DPYSL2 PE=1 SV=1	28	14	73.5	627.2	437.9	3.51964	3.83115	1.0885	0.122348
High	Master Protein	P42285	Exosome RNA helicase MTR4 OS=Homo sapiens OX=9606 GN=MTREX PE=1 SV=3	2	3	117.7	33.8	23.6	0.189675	0.206474	1.08857	0.122436
High	Master Protein	Q9Y4W6	AFG3-like protein 2 OS=Homo sapiens OX=9606 GN=AFG3L2 PE=1 SV=2	5	4	88.5	81.2	56.7	0.455668	0.496063	1.08865	0.122541
High	Master Protein	Q01518	Adenylyl cyclase-associated protein 1 OS=Homo sapiens OX=9606 GN=CAP1 PE=1 SV=5	34	19	51.9	1607.8	1123	9.02245	9.82502	1.08895	0.122942
High	Master Protein	Q5H9R7	Serine/threonine-protein phosphatase 6 regulatory subunit 3 OS=Homo sapiens OX=9606 GN=PPP6R3 PE=1 SV=2	6	4	97.6	221.9	155	1.24523	1.35608	1.08902	0.12303
High	Master Protein	Q07666	KH domain-containing, RNA-binding, signal transduction-associated protein 1 OS=Homo sapiens OX=9606 GN=KHDRBS1 PE=1 SV=1	6	4	48.2	335.5	234.4	1.88272	2.05074	1.08925	0.123332
High	Master Protein	P10412	Histone H1.4 OS=Homo sapiens OX=9606 GN=HIST1H1E PE=1 SV=2	28	8	21.9	101.6	71	0.570146	0.621172	1.0895	0.123662
High	Master Protein	P32004	Neural cell adhesion molecule L1 OS=Homo sapiens OX=9606 GN=L1CAM PE=1 SV=2	3	3	139.9	70.1	49	0.393378	0.428696	1.08978	0.124039
High	Master Protein	O15260	Surfeit locus protein 4 OS=Homo sapiens OX=9606 GN=SURF4 PE=1 SV=3	8	2	30.4	59.5	41.6	0.333895	0.363955	1.09003	0.124366
High	Master Protein	O75323	Protein NipSnap homolog 2 OS=Homo sapiens OX=9606 GN=NIPSNAP2 PE=1 SV=1	8	2	33.7	24.6	17.2	0.138047	0.150481	1.09007	0.124422
High	Master Protein	Q9H2M9	Rab3 GTPase-activating protein non-catalytic subunit OS=Homo sapiens OX=9606 GN=RAB3GAP2 PE=1 SV=1	1	2	155.9	12.3	8.6	0.0690236	0.0752406	1.09007	0.124422
High	Master Protein	Q9NZ32	Actin-related protein 10 OS=Homo sapiens OX=9606 GN=ACTR10 PE=1 SV=1	6	2	46.3	37.6	26.3	0.210999	0.230096	1.09051	0.125002
High	Master Protein	H7BXI1	Extended synaptotagmin-2 (Fragment) OS=Homo sapiens OX=9606 GN=ESYT2 PE=1 SV=1	10	6	97.9	200.5	140.3	1.12514	1.22747	1.09095	0.125585
High	Master Protein	P15927	Replication protein A 32 kDa subunit OS=Homo sapiens OX=9606 GN=RPA2 PE=1 SV=1	11	2	29.2	93.6	65.5	0.525253	0.573053	1.09101	0.125658
High	Master Protein	Q96DI7	U5 small nuclear ribonucleoprotein 40 kDa protein OS=Homo sapiens OX=9606 GN=SNRNP40 PE=1 SV=1	9	3	39.3	158.6	111	0.890011	0.971129	1.09114	0.125839
High	Master Protein	O00231	26S proteasome non-ATPase regulatory subunit 11 OS=Homo sapiens OX=9606 GN=PSMD11 PE=1 SV=3	29	11	47.4	616.1	431.2	3.45735	3.77253	1.09116	0.125865
High	Master Protein	P29323	Ephrin type-B receptor 2 OS=Homo sapiens OX=9606 GN=EPHB2 PE=1 SV=5	2	2	117.4	19	13.3	0.106622	0.11636	1.09134	0.126099
High	Master Protein	O15056	Synaptojanin-2 OS=Homo sapiens OX=9606 GN=SYNJ2 PE=1 SV=3	2	2	165.4	20	14	0.112233	0.122485	1.09134	0.126099
High	Master Protein	P45974	Ubiquitin carboxyl-terminal hydrolase 5 OS=Homo sapiens OX=9606 GN=USP5 PE=1 SV=2	8	6	95.7	252.7	176.9	1.41807	1.54768	1.0914	0.12618
High	Master Protein	O14617	AP-3 complex subunit delta-1 OS=Homo sapiens OX=9606 GN=AP3D1 PE=1 SV=1	8	7	130.1	149.9	105	0.84119	0.918635	1.09207	0.127061
High	Master Protein	O15231	Zinc finger protein 185 OS=Homo sapiens OX=9606 GN=ZNF185 PE=1 SV=3	20	10	73.5	180.4	126.4	1.01235	1.10586	1.09238	0.127469
High	Master Protein	O75915	PRA1 family protein 3 OS=Homo sapiens OX=9606 GN=ARL6IP5 PE=1 SV=1	24	5	21.6	163.2	114.4	0.915825	1.00087	1.09287	0.128118
High	Master Protein	D6RER5	Septin-11 OS=Homo sapiens OX=9606 GN=SEPT11 PE=1 SV=1	16	6	49.8	228.8	160.4	1.28395	1.40332	1.09297	0.128259
High	Master Protein	O14908	PDZ domain-containing protein GIPC1 OS=Homo sapiens OX=9606 GN=GIPC1 PE=1 SV=2	19	3	36	69	48.4	0.387205	0.423447	1.0936	0.129083
High	Master Protein	Q969Z0	FAST kinase domain-containing protein 4 OS=Homo sapiens OX=9606 GN=TBRG4 PE=1 SV=1	6	3	70.7	153.8	107.9	0.863075	0.944007	1.09377	0.129311
High	Master Protein	Q00765	Receptor expression-enhancing protein 5 OS=Homo sapiens OX=9606 GN=REEP5 PE=1 SV=3	10	2	21.5	131.7	92.4	0.739057	0.808399	1.09382	0.129381
High	Master Protein	Q01469	Fatty acid-binding protein, epidermal OS=Homo sapiens OX=9606 GN=FABP5 PE=1 SV=3	33	4	15.2	209.3	147	1.17452	1.28609	1.09499	0.130916
High	Master Protein	P09211	Glutathione S-transferase P OS=Homo sapiens OX=9606 GN=GSTP1 PE=1 SV=2	45	7	23.3	267.9	188.2	1.50337	1.64654	1.09524	0.131244
High	Master Protein	O75909	Cyclin-K OS=Homo sapiens OX=9606 GN=CCNK PE=1 SV=2	4	2	64.2	113	79.4	0.634119	0.694663	1.09548	0.13156
High	Master Protein	P53041	Serine/threonine-protein phosphatase 5 OS=Homo sapiens OX=9606 GN=PPP5C PE=1 SV=1	28	14	56.8	771.1	541.9	4.32716	4.74103	1.09565	0.131781
High	Master Protein	Q04941	Proteolipid protein 2 OS=Homo sapiens OX=9606 GN=PLP2 PE=1 SV=1	18	3	16.7	297.8	209.3	1.67116	1.83115	1.09574	0.1319
High	Master Protein	Q9UBQ5	Eukaryotic translation initiation factor 3 subunit K OS=Homo sapiens OX=9606 GN=EIF3K PE=1 SV=1	10	2	25	97.4	68.5	0.546577	0.5993	1.09646	0.132854
High	Master Protein	Q8IYS1	Peptidase M20 domain-containing protein 2 OS=Homo sapiens OX=9606 GN=PM20D2 PE=1 SV=2	6	2	47.7	36.4	25.6	0.204265	0.223972	1.09648	0.132877
High	Master Protein	A9Z1X7	Serine/arginine repetitive matrix protein 1 OS=Homo sapiens OX=9606 GN=SRRM1 PE=1 SV=1	2	2	103.3	43.9	30.9	0.246352	0.270341	1.09738	0.134058
High	Master Protein	P14927	Cytochrome b-c1 complex subunit 7 OS=Homo sapiens OX=9606 GN=UQCRB PE=1 SV=2	32	3	13.5	194.4	136.9	1.09091	1.19773	1.09791	0.134766
High	Master Protein	Q14657	EKC/KEOPS complex subunit LAGE3 OS=Homo sapiens OX=9606 GN=LAGE3 PE=1 SV=2	27	2	14.8	47.7	33.6	0.267677	0.293963	1.0982	0.135144
High	Master Protein	Q92890	Ubiquitin recognition factor in ER-associated degradation protein 1 OS=Homo sapiens OX=9606 GN=UFD1 PE=1 SV=3	20	4	34.5	131.3	92.5	0.736813	0.809274	1.09834	0.13533
High	Master Protein	P08621	U1 small nuclear ribonucleoprotein 70 kDa OS=Homo sapiens OX=9606 GN=SNRNP70 PE=1 SV=2	25	10	51.5	971.9	685.3	5.45398	5.99563	1.09931	0.1366
High	Master Protein	P48449	Lanosterol synthase OS=Homo sapiens OX=9606 GN=LSS PE=1 SV=1	13	9	83.3	221.2	156	1.2413	1.36483	1.09951	0.136867
High	Master Protein	A0A1B0GW77	Alpha-aminoadipic semialdehyde dehydrogenase OS=Homo sapiens OX=9606 GN=ALDH7A1 PE=1 SV=1	13	6	60	339.9	239.8	1.90741	2.09799	1.09992	0.137393
High	Master Protein	Q96CV9	Optineurin OS=Homo sapiens OX=9606 GN=OPTN PE=1 SV=3	12	6	65.9	179.3	126.5	1.00617	1.10674	1.09995	0.137434
High	Master Protein	F8WCF6	Actin-related protein 2/3 complex subunit 4 OS=Homo sapiens OX=9606 GN=ARPC4-TTLL3 PE=3 SV=1	34	6	21	213.6	150.7	1.19865	1.31846	1.09995	0.13744
High	Master Protein	P17301	Integrin alpha-2 OS=Homo sapiens OX=9606 GN=ITGA2 PE=1 SV=1	13	13	129.2	464.6	327.8	2.60718	2.86789	1.1	0.137499
High	Master Protein	O95425	Supervillin OS=Homo sapiens OX=9606 GN=SVIL PE=1 SV=2	1	2	247.6	29.9	21.1	0.167789	0.184602	1.1002	0.137769
High	Master Protein	A0A087X2I1	26S proteasome regulatory subunit 10B OS=Homo sapiens OX=9606 GN=PSMC6 PE=1 SV=1	16	6	45.8	246.5	174.1	1.38328	1.52318	1.10114	0.139
High	Master Protein	P49720	Proteasome subunit beta type-3 OS=Homo sapiens OX=9606 GN=PSMB3 PE=1 SV=2	30	6	22.9	385.8	272.5	2.16498	2.38408	1.1012	0.139075
High	Master Protein	Q96BM9	ADP-ribosylation factor-like protein 8A OS=Homo sapiens OX=9606 GN=ARL8A PE=1 SV=1	39	5	21.4	30	21.2	0.16835	0.185477	1.10173	0.139774
High	Master Protein	P43686	26S proteasome regulatory subunit 6B OS=Homo sapiens OX=9606 GN=PSMC4 PE=1 SV=2	23	6	47.3	295.3	208.7	1.65713	1.8259	1.10184	0.139921
High	Master Protein	Q08945	FACT complex subunit SSRP1 OS=Homo sapiens OX=9606 GN=SSRP1 PE=1 SV=1	19	12	81	1081.3	764.2	6.0679	6.68591	1.10185	0.139927
High	Master Protein	Q6PI48	Aspartate--tRNA ligase, mitochondrial OS=Homo sapiens OX=9606 GN=DARS2 PE=1 SV=1	4	2	73.5	19.1	13.5	0.107183	0.11811	1.10195	0.140059
High	Master Protein	P00403	Cytochrome c oxidase subunit 2 OS=Homo sapiens OX=9606 GN=MT-CO2 PE=1 SV=1	15	3	25.5	136.6	96.6	0.766554	0.845144	1.10252	0.14081
High	Master Protein	P55084	Trifunctional enzyme subunit beta, mitochondrial OS=Homo sapiens OX=9606 GN=HADHB PE=1 SV=3	15	7	51.3	314.9	222.7	1.76712	1.94838	1.10258	0.14088
High	Master Protein	K7ENT6	Tropomyosin alpha-4 chain (Fragment) OS=Homo sapiens OX=9606 GN=TPM4 PE=1 SV=1	43	11	20.6	67.3	47.6	0.377666	0.416448	1.10269	0.141027
High	Master Protein	Q96PK6	RNA-binding protein 14 OS=Homo sapiens OX=9606 GN=RBM14 PE=1 SV=2	15	10	69.4	191	135.1	1.07183	1.18198	1.10277	0.141127
High	Master Protein	Q9BVG4	Protein PBDC1 OS=Homo sapiens OX=9606 GN=PBDC1 PE=1 SV=1	21	4	26	37.6	26.6	0.210999	0.232721	1.10295	0.141366
High	Master Protein	Q14344	Guanine nucleotide-binding protein subunit alpha-13 OS=Homo sapiens OX=9606 GN=GNA13 PE=1 SV=2	8	3	44	97.8	69.2	0.548822	0.605424	1.10314	0.14161
High	Master Protein	P53999	Activated RNA polymerase II transcriptional coactivator p15 OS=Homo sapiens OX=9606 GN=SUB1 PE=1 SV=3	37	5	14.4	300.4	212.6	1.68575	1.86002	1.10338	0.141929
High	Master Protein	A0A0G2JHC2	PPP1R18 OS=Homo sapiens OX=9606 GN=PPP1R18 PE=1 SV=1	11	5	68	181.6	128.6	1.01908	1.12511	1.10404	0.142798
High	Master Protein	P47985	Cytochrome b-c1 complex subunit Rieske, mitochondrial OS=Homo sapiens OX=9606 GN=UQCRFS1 PE=1 SV=2	8	2	29.6	73	51.7	0.409652	0.452318	1.10415	0.14294
High	Master Protein	P12081	Histidine--tRNA ligase, cytoplasmic OS=Homo sapiens OX=9606 GN=HARS PE=1 SV=2	18	10	57.4	793.1	561.9	4.45062	4.91601	1.10457	0.143483
High	Master Protein	Q9Y490	Talin-1 OS=Homo sapiens OX=9606 GN=TLN1 PE=1 SV=3	33	68	269.6	2860.3	2027	16.0511	17.734	1.10485	0.143852
High	Master Protein	P53992	Protein transport protein Sec24C OS=Homo sapiens OX=9606 GN=SEC24C PE=1 SV=3	3	3	118.2	117.4	83.2	0.65881	0.727909	1.10488	0.143895
High	Master Protein	O75390	Citrate synthase, mitochondrial OS=Homo sapiens OX=9606 GN=CS PE=1 SV=2	22	10	51.7	832.5	590.1	4.67172	5.16273	1.1051	0.144181
High	Master Protein	P26583	High mobility group protein B2 OS=Homo sapiens OX=9606 GN=HMGB2 PE=1 SV=2	19	4	24	268.7	190.6	1.50786	1.66754	1.1059	0.145224
High	Master Protein	O43242	26S proteasome non-ATPase regulatory subunit 3 OS=Homo sapiens OX=9606 GN=PSMD3 PE=1 SV=2	24	12	60.9	684.4	485.5	3.84063	4.24759	1.10596	0.145303
High	Master Protein	Q7Z7H5	Transmembrane emp24 domain-containing protein 4 OS=Homo sapiens OX=9606 GN=TMED4 PE=1 SV=1	22	7	25.9	32.7	23.2	0.183502	0.202975	1.10612	0.145506
High	Master Protein	P11586	C-1-tetrahydrofolate synthase, cytoplasmic OS=Homo sapiens OX=9606 GN=MTHFD1 PE=1 SV=3	32	28	101.5	1261.7	895.3	7.08025	7.8329	1.1063	0.145746
High	Master Protein	P11166	Solute carrier family 2, facilitated glucose transporter member 1 OS=Homo sapiens OX=9606 GN=SLC2A1 PE=1 SV=2	7	3	54	163.8	116.3	0.919192	1.0175	1.10695	0.146588
High	Master Protein	O95372	Acyl-protein thioesterase 2 OS=Homo sapiens OX=9606 GN=LYPLA2 PE=1 SV=1	11	2	24.7	43.8	31.1	0.245791	0.272091	1.107	0.146656
High	Master Protein	B2R5W2	Heterogeneous nuclear ribonucleoproteins C1/C2 OS=Homo sapiens OX=9606 GN=HNRNPC PE=1 SV=1	43	19	31.9	1462	1038.4	8.20426	9.08486	1.10733	0.147091
High	Master Protein	O60313	Dynamin-like 120 kDa protein, mitochondrial OS=Homo sapiens OX=9606 GN=OPA1 PE=1 SV=3	7	6	111.6	176.9	125.7	0.992705	1.09974	1.10782	0.147723
High	Master Protein	P36543	V-type proton ATPase subunit E 1 OS=Homo sapiens OX=9606 GN=ATP6V1E1 PE=1 SV=1	10	2	26.1	76.4	54.3	0.428732	0.475066	1.10807	0.148051
High	Master Protein	Q13123	Protein Red OS=Homo sapiens OX=9606 GN=IK PE=1 SV=3	7	3	65.6	84.4	60	0.473625	0.524934	1.10833	0.148391
High	Master Protein	Q99986	Serine/threonine-protein kinase VRK1 OS=Homo sapiens OX=9606 GN=VRK1 PE=1 SV=1	28	8	45.4	353.4	251.3	1.98316	2.1986	1.10863	0.148781
High	Master Protein	P63167	Dynein light chain 1, cytoplasmic OS=Homo sapiens OX=9606 GN=DYNLL1 PE=1 SV=1	45	4	10.4	556.2	395.6	3.12121	3.46107	1.10889	0.149111
High	Master Protein	H0YHG0	Uncharacterized protein (Fragment) OS=Homo sapiens OX=9606 PE=1 SV=1	6	3	59.1	169.4	120.5	0.950617	1.05424	1.10901	0.149271
High	Master Protein	P62888	60S ribosomal protein L30 OS=Homo sapiens OX=9606 GN=RPL30 PE=1 SV=2	54	7	12.8	539.4	383.7	3.02694	3.35696	1.10903	0.149295
High	Master Protein	P83916	Chromobox protein homolog 1 OS=Homo sapiens OX=9606 GN=CBX1 PE=1 SV=1	9	2	21.4	128.1	91.2	0.718855	0.7979	1.10996	0.150507
High	Master Protein	Q96EL3	39S ribosomal protein L53, mitochondrial OS=Homo sapiens OX=9606 GN=MRPL53 PE=1 SV=1	22	2	12.1	19.1	13.6	0.107183	0.118985	1.11011	0.150706
High	Master Protein	P28070	Proteasome subunit beta type-4 OS=Homo sapiens OX=9606 GN=PSMB4 PE=1 SV=4	23	4	29.2	154.3	109.9	0.865881	0.961505	1.11044	0.151125
High	Master Protein	O43488	Aflatoxin B1 aldehyde reductase member 2 OS=Homo sapiens OX=9606 GN=AKR7A2 PE=1 SV=3	17	5	39.6	78.2	55.7	0.438833	0.487314	1.11048	0.151181
High	Master Protein	P36542	ATP synthase subunit gamma, mitochondrial OS=Homo sapiens OX=9606 GN=ATP5F1C PE=1 SV=1	25	8	33	517.9	368.9	2.90629	3.22747	1.11051	0.151228
High	Master Protein	Q9BQ61	Telomerase RNA component interacting RNase OS=Homo sapiens OX=9606 GN=TRIR PE=1 SV=1	20	3	18.4	102.9	73.3	0.577441	0.641295	1.11058	0.151314
High	Master Protein	Q9BTV4	Transmembrane protein 43 OS=Homo sapiens OX=9606 GN=TMEM43 PE=1 SV=1	23	8	44.8	727.7	518.5	4.08361	4.53631	1.11086	0.151672
High	Master Protein	P15374	Ubiquitin carboxyl-terminal hydrolase isozyme L3 OS=Homo sapiens OX=9606 GN=UCHL3 PE=1 SV=1	10	2	26.2	40.7	29	0.228395	0.253718	1.11087	0.151696
High	Master Protein	Q9BSJ8	Extended synaptotagmin-1 OS=Homo sapiens OX=9606 GN=ESYT1 PE=1 SV=1	10	8	122.8	286.8	204.4	1.60943	1.78828	1.11113	0.152022
High	Master Protein	P61019	Ras-related protein Rab-2A OS=Homo sapiens OX=9606 GN=RAB2A PE=1 SV=1	20	4	23.5	263.5	187.8	1.47868	1.64304	1.11116	0.152066
High	Master Protein	Q9NYL9	Tropomodulin-3 OS=Homo sapiens OX=9606 GN=TMOD3 PE=1 SV=1	12	4	39.6	209.9	149.6	1.17789	1.30884	1.11117	0.15208
High	Master Protein	O43760	Synaptogyrin-2 OS=Homo sapiens OX=9606 GN=SYNGR2 PE=1 SV=1	9	2	24.8	30.3	21.6	0.170034	0.188976	1.11141	0.152385
High	Master Protein	P11177	Pyruvate dehydrogenase E1 component subunit beta, mitochondrial OS=Homo sapiens OX=9606 GN=PDHB PE=1 SV=3	23	9	39.2	447.5	319.1	2.51122	2.79178	1.11172	0.152793
High	Master Protein	M0R2S1	Ubiquitin-60S ribosomal protein L40 (Fragment) OS=Homo sapiens OX=9606 GN=UBA52 PE=1 SV=1	29	10	15.5	382.6	272.9	2.14703	2.38758	1.11204	0.153207
High	Master Protein	P49790	Nuclear pore complex protein Nup153 OS=Homo sapiens OX=9606 GN=NUP153 PE=1 SV=2	4	5	153.8	73.3	52.3	0.411336	0.457568	1.1124	0.15367
High	Master Protein	Q14203	Dynactin subunit 1 OS=Homo sapiens OX=9606 GN=DCTN1 PE=1 SV=3	8	10	141.6	285.8	204	1.60382	1.78478	1.11283	0.154235
High	Master Protein	Q99426	Tubulin-folding cofactor B OS=Homo sapiens OX=9606 GN=TBCB PE=1 SV=2	22	6	27.3	279.9	199.8	1.57071	1.74803	1.11289	0.154317
High	Master Protein	P61163	Alpha-centractin OS=Homo sapiens OX=9606 GN=ACTR1A PE=1 SV=1	18	6	42.6	293.1	209.4	1.64478	1.83202	1.11384	0.15554
High	Master Protein	P25786	Proteasome subunit alpha type-1 OS=Homo sapiens OX=9606 GN=PSMA1 PE=1 SV=1	41	14	29.5	828.7	592.1	4.65039	5.18023	1.11393	0.155663
High	Master Protein	P24539	ATP synthase F(0) complex subunit B1, mitochondrial OS=Homo sapiens OX=9606 GN=ATP5F1 PE=1 SV=2	14	4	28.9	222.6	159.1	1.24916	1.39195	1.11431	0.156152
High	Master Protein	P00505	Aspartate aminotransferase, mitochondrial OS=Homo sapiens OX=9606 GN=GOT2 PE=1 SV=3	27	10	47.5	621.2	444	3.48597	3.88451	1.11433	0.156174
High	Master Protein	A0A140T9T7	Antigen peptide transporter 1 OS=Homo sapiens OX=9606 GN=TAP1 PE=1 SV=1	4	3	87.1	77.3	55.3	0.433782	0.483815	1.11534	0.157483
High	Master Protein	Q8TEQ6	Gem-associated protein 5 OS=Homo sapiens OX=9606 GN=GEMIN5 PE=1 SV=3	2	2	168.5	14.1	10.1	0.0791246	0.088364	1.11677	0.159332
High	Master Protein	Q15181	Inorganic pyrophosphatase OS=Homo sapiens OX=9606 GN=PPA1 PE=1 SV=2	57	15	32.6	1181.5	846.5	6.63019	7.40595	1.117	0.159634
High	Master Protein	P28838	Cytosol aminopeptidase OS=Homo sapiens OX=9606 GN=LAP3 PE=1 SV=3	29	12	56.1	397.9	285.1	2.23288	2.49431	1.11708	0.159734
High	Master Protein	Q9Y5B9	FACT complex subunit SPT16 OS=Homo sapiens OX=9606 GN=SUPT16H PE=1 SV=1	18	19	119.8	642	460.1	3.60269	4.02537	1.11732	0.160046
High	Master Protein	Q9NR28	Diablo homolog, mitochondrial OS=Homo sapiens OX=9606 GN=DIABLO PE=1 SV=1	17	5	27.1	118.4	84.9	0.664422	0.742782	1.11794	0.160839
High	Master Protein	P62879	Guanine nucleotide-binding protein G(I)/G(S)/G(T) subunit beta-2 OS=Homo sapiens OX=9606 GN=GNB2 PE=1 SV=3	20	7	37.3	595.9	427.3	3.344	3.73841	1.11795	0.160851
High	Master Protein	Q96KB5	Lymphokine-activated killer T-cell-originated protein kinase OS=Homo sapiens OX=9606 GN=PBK PE=1 SV=3	6	2	36.1	16.3	11.7	0.0914703	0.102362	1.11908	0.162308														0.5	#DIV/0!
High	Master Protein	Q8NI27	THO complex subunit 2 OS=Homo sapiens OX=9606 GN=THOC2 PE=1 SV=2	2	4	182.7	113.8	81.7	0.638608	0.714786	1.11929	0.162579														-0.30103
High	Master Protein	P46060	Ran GTPase-activating protein 1 OS=Homo sapiens OX=9606 GN=RANGAP1 PE=1 SV=1	18	9	63.5	319.1	229.2	1.79068	2.00525	1.11982	0.16327
High	Master Protein	P46108	Adapter molecule crk OS=Homo sapiens OX=9606 GN=CRK PE=1 SV=2	22	5	33.8	189.9	136.4	1.06566	1.19335	1.11983	0.163276
High	Master Protein	Q13177	Serine/threonine-protein kinase PAK 2 OS=Homo sapiens OX=9606 GN=PAK2 PE=1 SV=3	29	10	58	607.8	436.6	3.41077	3.81977	1.11991	0.163387
High	Master Protein	Q8N3U4	Cohesin subunit SA-2 OS=Homo sapiens OX=9606 GN=STAG2 PE=1 SV=3	3	3	141.2	91.6	65.8	0.514029	0.575678	1.11993	0.163412
High	Master Protein	A0A087WW66	26S proteasome non-ATPase regulatory subunit 1 OS=Homo sapiens OX=9606 GN=PSMD1 PE=1 SV=1	16	13	105.8	508.6	365.4	2.8541	3.19685	1.12009	0.163617
High	Master Protein	P68032	Actin, alpha cardiac muscle 1 OS=Homo sapiens OX=9606 GN=ACTC1 PE=1 SV=1	30	84	42	782.8	562.4	4.39282	4.92038	1.1201	0.163625
High	Master Protein	Q15019	Septin-2 OS=Homo sapiens OX=9606 GN=SEPT2 PE=1 SV=1	36	9	41.5	503	361.4	2.82267	3.16185	1.12016	0.16371
High	Master Protein	Q5VV89	Microsomal glutathione S-transferase 3 OS=Homo sapiens OX=9606 GN=MGST3 PE=1 SV=1	13	2	18.4	108.4	77.9	0.608305	0.68154	1.12039	0.164002
High	Master Protein	P57088	Transmembrane protein 33 OS=Homo sapiens OX=9606 GN=TMEM33 PE=1 SV=2	8	2	28	22.4	16.1	0.125701	0.140857	1.12057	0.164234
High	Master Protein	Q03252	Lamin-B2 OS=Homo sapiens OX=9606 GN=LMNB2 PE=1 SV=4	36	22	69.9	701.2	504	3.9349	4.40945	1.1206	0.16427
High	Master Protein	P60468	Protein transport protein Sec61 subunit beta OS=Homo sapiens OX=9606 GN=SEC61B PE=1 SV=2	29	3	10	130.5	93.8	0.732323	0.820647	1.12061	0.164282
High	Master Protein	P49458	Signal recognition particle 9 kDa protein OS=Homo sapiens OX=9606 GN=SRP9 PE=1 SV=2	19	3	10.1	253.9	182.5	1.4248	1.59668	1.12063	0.164308
High	Master Protein	H7BYY1	Tropomyosin 1 (Alpha), isoform CRA_m OS=Homo sapiens OX=9606 GN=TPM1 PE=1 SV=1	31	9	28.7	172.8	124.3	0.969697	1.08749	1.12147	0.165395
High	Master Protein	B4DUT8	Calponin OS=Homo sapiens OX=9606 GN=CNN2 PE=1 SV=1	23	7	35.9	235.2	169.2	1.31987	1.48031	1.12157	0.165513
High	Master Protein	Q13263	Transcription intermediary factor 1-beta OS=Homo sapiens OX=9606 GN=TRIM28 PE=1 SV=5	23	18	88.5	843.4	606.9	4.73288	5.30971	1.12188	0.165914
High	Master Protein	Q13620	Cullin-4B OS=Homo sapiens OX=9606 GN=CUL4B PE=1 SV=4	12	11	103.9	593.8	427.3	3.33221	3.73841	1.1219	0.165944
High	Master Protein	O43747	AP-1 complex subunit gamma-1 OS=Homo sapiens OX=9606 GN=AP1G1 PE=1 SV=5	5	5	91.3	92.8	66.8	0.520763	0.584427	1.12225	0.166395
High	Master Protein	P17252	Protein kinase C alpha type OS=Homo sapiens OX=9606 GN=PRKCA PE=1 SV=4	8	4	76.7	51.4	37	0.28844	0.32371	1.12228	0.166429
High	Master Protein	Q5JWF2	Guanine nucleotide-binding protein G(s) subunit alpha isoforms XLas OS=Homo sapiens OX=9606 GN=GNAS PE=1 SV=2	6	7	111	235.9	169.9	1.32379	1.48644	1.12286	0.167182
High	Master Protein	P07384	Calpain-1 catalytic subunit OS=Homo sapiens OX=9606 GN=CAPN1 PE=1 SV=1	22	14	81.8	482.9	348	2.70988	3.04462	1.12353	0.168035
High	Master Protein	Q9HCD5	Nuclear receptor coactivator 5 OS=Homo sapiens OX=9606 GN=NCOA5 PE=1 SV=2	8	4	65.5	128.6	92.7	0.721661	0.811024	1.12383	0.168423
High	Master Protein	A0A0C4DGB5	Calpastatin OS=Homo sapiens OX=9606 GN=CAST PE=1 SV=1	28	18	81	875	631.1	4.91021	5.52143	1.12448	0.169258
High	Master Protein	Q08211	ATP-dependent RNA helicase A OS=Homo sapiens OX=9606 GN=DHX9 PE=1 SV=4	25	27	140.9	1334.5	962.7	7.48878	8.42257	1.12469	0.169531
High	Master Protein	O14786	Neuropilin-1 OS=Homo sapiens OX=9606 GN=NRP1 PE=1 SV=3	15	10	103.1	340.3	245.5	1.90965	2.14786	1.12474	0.169588
High	Master Protein	Q8WXX5	DnaJ homolog subfamily C member 9 OS=Homo sapiens OX=9606 GN=DNAJC9 PE=1 SV=1	13	3	29.9	106.3	76.7	0.596521	0.671041	1.12493	0.169829
High	Master Protein	P30040	Endoplasmic reticulum resident protein 29 OS=Homo sapiens OX=9606 GN=ERP29 PE=1 SV=4	36	10	29	746.4	538.6	4.18855	4.71216	1.12501	0.169937
High	Master Protein	X6RAY8	39S ribosomal protein L4, mitochondrial OS=Homo sapiens OX=9606 GN=MRPL4 PE=1 SV=1	6	2	39.6	26.6	19.2	0.14927	0.167979	1.12533	0.170352
High	Master Protein	E9PB61	THO complex subunit 4 OS=Homo sapiens OX=9606 GN=ALYREF PE=1 SV=1	17	3	27.5	122.6	88.5	0.687991	0.774278	1.12542	0.170462
High	Master Protein	Q8IVF2	Protein AHNAK2 OS=Homo sapiens OX=9606 GN=AHNAK2 PE=1 SV=2	9	8	616.2	337.8	243.9	1.89562	2.13386	1.12568	0.170792
High	Master Protein	E7EMK3	Flotillin-2 OS=Homo sapiens OX=9606 GN=FLOT2 PE=1 SV=1	19	8	53.1	445.5	321.7	2.5	2.81452	1.12581	0.170962
High	Master Protein	P31939	Bifunctional purine biosynthesis protein PURH OS=Homo sapiens OX=9606 GN=ATIC PE=1 SV=3	37	19	64.6	951	686.8	5.3367	6.00875	1.12593	0.171117
High	Master Protein	Q9UBS4	DnaJ homolog subfamily B member 11 OS=Homo sapiens OX=9606 GN=DNAJB11 PE=1 SV=1	16	5	40.5	95.5	69	0.535915	0.603675	1.12644	0.171768
High	Master Protein	Q14320	Protein FAM50A OS=Homo sapiens OX=9606 GN=FAM50A PE=1 SV=2	16	4	40.2	107.4	77.6	0.602694	0.678915	1.12647	0.171806
High	Master Protein	Q8IVM0	Coiled-coil domain-containing protein 50 OS=Homo sapiens OX=9606 GN=CCDC50 PE=1 SV=1	10	2	35.8	50.1	36.2	0.281145	0.31671	1.1265	0.171851
High	Master Protein	O60832	H/ACA ribonucleoprotein complex subunit 4 OS=Homo sapiens OX=9606 GN=DKC1 PE=1 SV=3	7	4	57.6	217.2	157	1.21886	1.37358	1.12694	0.172412
High	Master Protein	A0A0D9SEY1	Mitogen-activated protein kinase kinase kinase kinase 4 OS=Homo sapiens OX=9606 GN=MAP4K4 PE=1 SV=1	3	3	151	68.2	49.3	0.382716	0.431321	1.127	0.172488
High	Master Protein	P12270	Nucleoprotein TPR OS=Homo sapiens OX=9606 GN=TPR PE=1 SV=3	8	15	267.1	504.3	364.7	2.82997	3.19073	1.12748	0.1731
High	Master Protein	P02792	Ferritin light chain OS=Homo sapiens OX=9606 GN=FTL PE=1 SV=2	13	2	20	125	90.4	0.701459	0.790901	1.12751	0.173139
High	Master Protein	A0A087WWU8	Tropomyosin alpha-3 chain OS=Homo sapiens OX=9606 GN=TPM3 PE=1 SV=1	47	15	26.4	69.8	50.5	0.391695	0.44182	1.12797	0.173728
High	Master Protein	Q08257	Quinone oxidoreductase OS=Homo sapiens OX=9606 GN=CRYZ PE=1 SV=1	8	3	35.2	132.9	96.2	0.745791	0.841645	1.12853	0.17444
High	Master Protein	P31946	14-3-3 protein beta/alpha OS=Homo sapiens OX=9606 GN=YWHAB PE=1 SV=3	48	15	28.1	214.4	155.2	1.20314	1.35783	1.12857	0.174496
High	Master Protein	K7ELC7	60S ribosomal protein L27 (Fragment) OS=Homo sapiens OX=9606 GN=RPL27 PE=1 SV=1	35	4	16.5	564.5	408.7	3.16779	3.57568	1.12876	0.174741
High	Master Protein	P25788	Proteasome subunit alpha type-3 OS=Homo sapiens OX=9606 GN=PSMA3 PE=1 SV=2	31	9	28.4	1082.6	784	6.0752	6.85914	1.12904	0.175097
High	Master Protein	A0A0C4DGQ5	Calpain small subunit 1 OS=Homo sapiens OX=9606 GN=CAPNS1 PE=1 SV=1	39	8	33.8	322	233.2	1.80696	2.04024	1.1291	0.175179
High	Master Protein	Q9H1E3	Nuclear ubiquitous casein and cyclin-dependent kinase substrate 1 OS=Homo sapiens OX=9606 GN=NUCKS1 PE=1 SV=1	13	3	27.3	205.4	148.8	1.15264	1.30184	1.12944	0.17561
High	Master Protein	P25705	ATP synthase subunit alpha, mitochondrial OS=Homo sapiens OX=9606 GN=ATP5F1A PE=1 SV=1	42	22	59.7	1270.8	920.8	7.13131	8.05599	1.12966	0.175895
High	Master Protein	P48729	Casein kinase I isoform alpha OS=Homo sapiens OX=9606 GN=CSNK1A1 PE=1 SV=2	12	3	38.9	168.5	122.1	0.945567	1.06824	1.12974	0.175987
High	Master Protein	Q16543	Hsp90 co-chaperone Cdc37 OS=Homo sapiens OX=9606 GN=CDC37 PE=1 SV=1	29	10	44.4	574.7	416.6	3.22503	3.64479	1.13016	0.176526
High	Master Protein	O14744	Protein arginine N-methyltransferase 5 OS=Homo sapiens OX=9606 GN=PRMT5 PE=1 SV=4	11	4	72.6	93.1	67.5	0.522447	0.590551	1.13036	0.176778
High	Master Protein	O00763	Acetyl-CoA carboxylase 2 OS=Homo sapiens OX=9606 GN=ACACB PE=1 SV=3	2	2	276.4	20.4	14.8	0.114478	0.129484	1.13108	0.1777
High	Master Protein	Q9UHD8	Septin-9 OS=Homo sapiens OX=9606 GN=SEPT9 PE=1 SV=2	23	13	65.4	843.9	612.3	4.73569	5.35696	1.13119	0.177839
High	Master Protein	Q71DI3	Histone H3.2 OS=Homo sapiens OX=9606 GN=HIST2H3A PE=1 SV=3	46	7	15.4	810.4	588.3	4.5477	5.14698	1.13178	0.17859
High	Master Protein	O75643	U5 small nuclear ribonucleoprotein 200 kDa helicase OS=Homo sapiens OX=9606 GN=SNRNP200 PE=1 SV=2	10	19	244.4	1204	874.4	6.75645	7.65004	1.13226	0.179202
High	Master Protein	P08559	Pyruvate dehydrogenase E1 component subunit alpha, somatic form, mitochondrial OS=Homo sapiens OX=9606 GN=PDHA1 PE=1 SV=3	17	7	43.3	424.9	308.6	2.3844	2.69991	1.13232	0.179287
High	Master Protein	Q9NS25	Sperm protein associated with the nucleus on the X chromosome B1 OS=Homo sapiens OX=9606 GN=SPANXB1 PE=2 SV=2	75	8	11.8	611	443.8	3.42873	3.88276	1.13242	0.179409
High	Master Protein	Q14376	UDP-glucose 4-epimerase OS=Homo sapiens OX=9606 GN=GALE PE=1 SV=2	22	5	38.3	110.8	80.5	0.621773	0.704287	1.13271	0.179775
High	Master Protein	Q14764	Major vault protein OS=Homo sapiens OX=9606 GN=MVP PE=1 SV=4	31	21	99.3	1027.4	746.5	5.76543	6.53106	1.1328	0.179888
High	Master Protein	P02794	Ferritin heavy chain OS=Homo sapiens OX=9606 GN=FTH1 PE=1 SV=2	10	2	21.2	194.3	141.2	1.09035	1.23535	1.13298	0.180126
High	Master Protein	P06576	ATP synthase subunit beta, mitochondrial OS=Homo sapiens OX=9606 GN=ATP5F1B PE=1 SV=3	41	19	56.5	495.9	360.5	2.78283	3.15398	1.13337	0.180622
High	Master Protein	Q13547	Histone deacetylase 1 OS=Homo sapiens OX=9606 GN=HDAC1 PE=1 SV=1	15	6	55.1	308.8	224.5	1.73288	1.96413	1.13345	0.180715
High	Master Protein	P62277	40S ribosomal protein S13 OS=Homo sapiens OX=9606 GN=RPS13 PE=1 SV=2	44	7	17.2	487.8	354.7	2.73737	3.10324	1.13365	0.180982
High	Master Protein	P06396	Gelsolin OS=Homo sapiens OX=9606 GN=GSN PE=1 SV=1	23	15	85.6	685.6	498.6	3.84736	4.3622	1.13382	0.181188
High	Master Protein	P52434	DNA-directed RNA polymerases I, II, and III subunit RPABC3 OS=Homo sapiens OX=9606 GN=POLR2H PE=1 SV=4	27	2	17.1	14.3	10.4	0.0802469	0.0909886	1.13386	0.18124
High	Master Protein	P22234	Multifunctional protein ADE2 OS=Homo sapiens OX=9606 GN=PAICS PE=1 SV=3	29	13	47	936.3	681	5.25421	5.95801	1.13395	0.181356
High	Master Protein	O60502	Protein O-GlcNAcase OS=Homo sapiens OX=9606 GN=MGEA5 PE=1 SV=2	3	3	102.8	118.1	85.9	0.662738	0.751531	1.13398	0.181393
High	Master Protein	Q00577	Transcriptional activator protein Pur-alpha OS=Homo sapiens OX=9606 GN=PURA PE=1 SV=2	13	3	34.9	112.6	81.9	0.631874	0.716535	1.13398	0.1814
High	Master Protein	O14980	Exportin-1 OS=Homo sapiens OX=9606 GN=XPO1 PE=1 SV=1	19	19	123.3	1084.4	788.9	6.0853	6.90201	1.13421	0.181689
High	Master Protein	P11233	Ras-related protein Ral-A OS=Homo sapiens OX=9606 GN=RALA PE=1 SV=1	15	3	23.6	381.1	277.3	2.13861	2.42607	1.13442	0.18195
High	Master Protein	A8MUS3	60S ribosomal protein L23a OS=Homo sapiens OX=9606 GN=RPL23A PE=1 SV=1	26	6	21.9	1097.2	798.5	6.15713	6.986	1.13462	0.18221
High	Master Protein	Q13601	KRR1 small subunit processome component homolog OS=Homo sapiens OX=9606 GN=KRR1 PE=1 SV=4	7	4	43.6	198.8	144.7	1.1156	1.26597	1.13479	0.182419
High	Master Protein	O15294	UDP-N-acetylglucosamine--peptide N-acetylglucosaminyltransferase 110 kDa subunit OS=Homo sapiens OX=9606 GN=OGT PE=1 SV=3	3	3	116.9	74.3	54.1	0.416947	0.473316	1.13519	0.182938
High	Master Protein	Q13724	Mannosyl-oligosaccharide glucosidase OS=Homo sapiens OX=9606 GN=MOGS PE=1 SV=5	5	3	91.9	50.4	36.7	0.282828	0.321085	1.13526	0.183028
High	Master Protein	P61086	Ubiquitin-conjugating enzyme E2 K OS=Homo sapiens OX=9606 GN=UBE2K PE=1 SV=3	24	4	22.4	64.4	46.9	0.361392	0.410324	1.1354	0.183199
High	Master Protein	O15144	Actin-related protein 2/3 complex subunit 2 OS=Homo sapiens OX=9606 GN=ARPC2 PE=1 SV=1	36	13	34.3	798.8	582	4.4826	5.09186	1.13592	0.183857
High	Master Protein	Q9NUJ1	Mycophenolic acid acyl-glucuronide esterase, mitochondrial OS=Homo sapiens OX=9606 GN=ABHD10 PE=1 SV=1	12	3	33.9	114.6	83.5	0.643098	0.730534	1.13596	0.183913
High	Master Protein	Q9Y3C6	Peptidyl-prolyl cis-trans isomerase-like 1 OS=Homo sapiens OX=9606 GN=PPIL1 PE=1 SV=1	15	2	18.2	120.6	87.9	0.676768	0.769029	1.13633	0.184377
High	Master Protein	P36776	Lon protease homolog, mitochondrial OS=Homo sapiens OX=9606 GN=LONP1 PE=1 SV=2	14	10	106.4	383.5	279.6	2.15208	2.44619	1.13667	0.18481
High	Master Protein	P60510	Serine/threonine-protein phosphatase 4 catalytic subunit OS=Homo sapiens OX=9606 GN=PPP4C PE=1 SV=1	12	3	35.1	130.7	95.3	0.733446	0.833771	1.13679	0.184961
High	Master Protein	Q15022	Polycomb protein SUZ12 OS=Homo sapiens OX=9606 GN=SUZ12 PE=1 SV=3	3	2	83	64	46.7	0.359147	0.408574	1.13762	0.186023
High	Master Protein	Q9NZ08	Endoplasmic reticulum aminopeptidase 1 OS=Homo sapiens OX=9606 GN=ERAP1 PE=1 SV=3	3	3	107.2	58.2	42.5	0.326599	0.371829	1.13849	0.187116
High	Master Protein	P41091	Eukaryotic translation initiation factor 2 subunit 3 OS=Homo sapiens OX=9606 GN=EIF2S3 PE=1 SV=3	21	9	51.1	668.5	488.4	3.7514	4.27297	1.13903	0.187808
High	Master Protein	O00743	Serine/threonine-protein phosphatase 6 catalytic subunit OS=Homo sapiens OX=9606 GN=PPP6C PE=1 SV=1	12	3	35.1	232.4	169.8	1.30415	1.48556	1.1391	0.187898
High	Master Protein	Q9Y265	RuvB-like 1 OS=Homo sapiens OX=9606 GN=RUVBL1 PE=1 SV=1	26	8	50.2	311.7	227.8	1.74916	1.993	1.13941	0.188282
High	Master Protein	A0A0A0MS54	cAMP-dependent protein kinase catalytic subunit beta OS=Homo sapiens OX=9606 GN=PRKACB PE=1 SV=1	13	4	41.3	153.1	111.9	0.859147	0.979003	1.13951	0.188408
High	Master Protein	P35610	Sterol O-acyltransferase 1 OS=Homo sapiens OX=9606 GN=SOAT1 PE=1 SV=3	13	7	64.7	423.5	309.6	2.37654	2.70866	1.13975	0.188715
High	Master Protein	J3QQX2	Rho GDP-dissociation inhibitor 1 OS=Homo sapiens OX=9606 GN=ARHGDIA PE=1 SV=1	20	7	25.8	341	249.3	1.91358	2.1811	1.1398	0.188783
High	Master Protein	O00203	AP-3 complex subunit beta-1 OS=Homo sapiens OX=9606 GN=AP3B1 PE=1 SV=3	9	9	121.2	200.6	146.8	1.1257	1.28434	1.14092	0.190202
High	Master Protein	A0A0C4DGG9	Chromodomain-helicase-DNA-binding protein 4 OS=Homo sapiens OX=9606 GN=CHD4 PE=1 SV=1	6	8	220.3	371	271.5	2.08193	2.37533	1.14093	0.190205
High	Master Protein	Q15717	ELAV-like protein 1 OS=Homo sapiens OX=9606 GN=ELAVL1 PE=1 SV=2	30	8	36.1	407	297.9	2.28395	2.6063	1.14114	0.190471
High	Master Protein	P26196	Probable ATP-dependent RNA helicase DDX6 OS=Homo sapiens OX=9606 GN=DDX6 PE=1 SV=2	25	9	54.4	307.1	224.8	1.72334	1.96675	1.14124	0.190605
High	Master Protein	P57678	Gem-associated protein 4 OS=Homo sapiens OX=9606 GN=GEMIN4 PE=1 SV=2	2	2	120	110.5	80.9	0.62009	0.707787	1.14143	0.190837
High	Master Protein	P36507	Dual specificity mitogen-activated protein kinase kinase 2 OS=Homo sapiens OX=9606 GN=MAP2K2 PE=1 SV=1	13	6	44.4	566.2	414.6	3.17733	3.6273	1.14162	0.19108
High	Master Protein	P61978	Heterogeneous nuclear ribonucleoprotein K OS=Homo sapiens OX=9606 GN=HNRNPK PE=1 SV=1	47	21	50.9	1358.6	994.9	7.62402	8.70429	1.14169	0.191175
High	Master Protein	P62847	40S ribosomal protein S24 OS=Homo sapiens OX=9606 GN=RPS24 PE=1 SV=1	29	6	15.4	332.3	243.4	1.86476	2.12948	1.14196	0.191515
High	Master Protein	P16083	Ribosyldihydronicotinamide dehydrogenase [quinone] OS=Homo sapiens OX=9606 GN=NQO2 PE=1 SV=5	24	3	25.9	24.3	17.8	0.136364	0.155731	1.14202	0.191593
High	Master Protein	P52788	Spermine synthase OS=Homo sapiens OX=9606 GN=SMS PE=1 SV=2	19	5	41.2	253.9	186	1.4248	1.6273	1.14212	0.191714
High	Master Protein	P22695	Cytochrome b-c1 complex subunit 2, mitochondrial OS=Homo sapiens OX=9606 GN=UQCRC2 PE=1 SV=3	26	8	48.4	404	296	2.26712	2.58968	1.14228	0.191914
High	Master Protein	Q8N257	Histone H2B type 3-B OS=Homo sapiens OX=9606 GN=HIST3H2BB PE=1 SV=3	52	18	13.9	2302.5	1687.3	12.9209	14.762	1.14249	0.192187
High	Master Protein	P20073	Annexin A7 OS=Homo sapiens OX=9606 GN=ANXA7 PE=1 SV=3	15	8	52.7	260.1	190.7	1.4596	1.66842	1.14307	0.19291
High	Master Protein	P61088	Ubiquitin-conjugating enzyme E2 N OS=Homo sapiens OX=9606 GN=UBE2N PE=1 SV=1	53	7	17.1	537.6	394.3	3.01684	3.44969	1.14348	0.193433
High	Master Protein	P23526	Adenosylhomocysteinase OS=Homo sapiens OX=9606 GN=AHCY PE=1 SV=4	35	15	47.7	1288.1	944.8	7.2284	8.26597	1.14354	0.193508
High	Master Protein	P62913	60S ribosomal protein L11 OS=Homo sapiens OX=9606 GN=RPL11 PE=1 SV=2	29	5	20.2	431.1	316.3	2.41919	2.76728	1.14389	0.193943
High	Master Protein	P62857	40S ribosomal protein S28 OS=Homo sapiens OX=9606 GN=RPS28 PE=1 SV=1	46	4	7.8	267.3	196.2	1.5	1.71654	1.14436	0.194537
High	Master Protein	H3BS72	Very-long-chain (3R)-3-hydroxyacyl-CoA dehydratase OS=Homo sapiens OX=9606 GN=HACD3 PE=1 SV=1	5	2	47.1	104.9	77	0.588664	0.673666	1.1444	0.194588
High	Master Protein	Q12906	Interleukin enhancer-binding factor 3 OS=Homo sapiens OX=9606 GN=ILF3 PE=1 SV=3	22	19	95.3	1047.2	768.8	5.87654	6.72616	1.14458	0.194815
High	Master Protein	O43776	Asparagine--tRNA ligase, cytoplasmic OS=Homo sapiens OX=9606 GN=NARS PE=1 SV=1	19	10	62.9	530.7	389.7	2.97811	3.40945	1.14483	0.195139
High	Master Protein	Q9C0C2	182 kDa tankyrase-1-binding protein OS=Homo sapiens OX=9606 GN=TNKS1BP1 PE=1 SV=4	1	2	181.7	16.2	11.9	0.0909091	0.104112	1.14523	0.19564
High	Master Protein	Q9H3Z4	DnaJ homolog subfamily C member 5 OS=Homo sapiens OX=9606 GN=DNAJC5 PE=1 SV=1	21	3	22.1	272.3	200.1	1.52806	1.75066	1.14567	0.196196
High	Master Protein	P13796	Plastin-2 OS=Homo sapiens OX=9606 GN=LCP1 PE=1 SV=6	48	33	70.2	1743.9	1281.8	9.7862	11.2143	1.14594	0.196526
High	Master Protein	Q9UBQ0	Vacuolar protein sorting-associated protein 29 OS=Homo sapiens OX=9606 GN=VPS29 PE=1 SV=1	16	3	20.5	27.2	20	0.152637	0.174978	1.14636	0.197065
High	Master Protein	P46778	60S ribosomal protein L21 OS=Homo sapiens OX=9606 GN=RPL21 PE=1 SV=2	26	5	18.6	314.3	231.2	1.76375	2.02275	1.14685	0.197671
High	Master Protein	Q9Y3T9	Nucleolar complex protein 2 homolog OS=Homo sapiens OX=9606 GN=NOC2L PE=1 SV=4	4	3	84.9	26.9	19.8	0.150954	0.173228	1.14756	0.198566
High	Master Protein	P68400	Casein kinase II subunit alpha OS=Homo sapiens OX=9606 GN=CSNK2A1 PE=1 SV=1	25	7	45.1	509.6	375.1	2.85971	3.28171	1.14757	0.198582
High	Master Protein	O00499	Myc box-dependent-interacting protein 1 OS=Homo sapiens OX=9606 GN=BIN1 PE=1 SV=1	10	5	64.7	157.9	116.3	0.886083	1.0175	1.14831	0.199512
High	Master Protein	E7EVA0	Microtubule-associated protein OS=Homo sapiens OX=9606 GN=MAP4 PE=1 SV=1	15	32	245.3	2070	1524.8	11.6162	13.3403	1.14843	0.199661
High	Master Protein	P62995	Transformer-2 protein homolog beta OS=Homo sapiens OX=9606 GN=TRA2B PE=1 SV=1	24	6	33.6	260.6	192.1	1.4624	1.68066	1.14925	0.200692
High	Master Protein	P47755	F-actin-capping protein subunit alpha-2 OS=Homo sapiens OX=9606 GN=CAPZA2 PE=1 SV=3	21	4	32.9	91.4	67.4	0.512907	0.589676	1.14968	0.201226
High	Master Protein	Q15020	Squamous cell carcinoma antigen recognized by T-cells 3 OS=Homo sapiens OX=9606 GN=SART3 PE=1 SV=1	5	5	109.9	104	76.7	0.583614	0.671041	1.1498	0.201387
High	Master Protein	P25787	Proteasome subunit alpha type-2 OS=Homo sapiens OX=9606 GN=PSMA2 PE=1 SV=2	29	5	25.9	100.7	74.3	0.565095	0.650044	1.15033	0.202042
High	Master Protein	P26373	60S ribosomal protein L13 OS=Homo sapiens OX=9606 GN=RPL13 PE=1 SV=4	27	7	24.2	590.9	436.2	3.31594	3.81627	1.15089	0.202748
High	Master Protein	P11717	Cation-independent mannose-6-phosphate receptor OS=Homo sapiens OX=9606 GN=IGF2R PE=1 SV=3	10	20	274.2	683.4	504.6	3.83502	4.4147	1.15115	0.203082
High	Master Protein	Q8TDD1	ATP-dependent RNA helicase DDX54 OS=Homo sapiens OX=9606 GN=DDX54 PE=1 SV=2	2	2	98.5	37.1	27.4	0.208193	0.23972	1.15143	0.203429
High	Master Protein	Q86XP3	ATP-dependent RNA helicase DDX42 OS=Homo sapiens OX=9606 GN=DDX42 PE=1 SV=1	2	2	102.9	49.4	36.5	0.277217	0.319335	1.15193	0.204057
High	Master Protein	Q92804	TATA-binding protein-associated factor 2N OS=Homo sapiens OX=9606 GN=TAF15 PE=1 SV=1	24	8	61.8	557.4	411.9	3.12795	3.60367	1.15209	0.204253
High	Master Protein	P38606	V-type proton ATPase catalytic subunit A OS=Homo sapiens OX=9606 GN=ATP6V1A PE=1 SV=2	3	2	68.3	61.7	45.6	0.34624	0.39895	1.15224	0.204435
High	Master Protein	C9J406	MICOS complex subunit MIC60 OS=Homo sapiens OX=9606 GN=IMMT PE=1 SV=1	26	15	73.2	738.5	545.9	4.14422	4.77603	1.15246	0.204711
High	Master Protein	Q96FQ6	Protein S100-A16 OS=Homo sapiens OX=9606 GN=S100A16 PE=1 SV=1	41	3	11.8	158	116.8	0.886644	1.02187	1.15252	0.204788
High	Master Protein	Q15102	Platelet-activating factor acetylhydrolase IB subunit gamma OS=Homo sapiens OX=9606 GN=PAFAH1B3 PE=1 SV=1	18	5	25.7	194.1	143.5	1.08923	1.25547	1.15262	0.204923
High	Master Protein	Q05048	Cleavage stimulation factor subunit 1 OS=Homo sapiens OX=9606 GN=CSTF1 PE=1 SV=1	5	2	48.3	16.9	12.5	0.0948373	0.109361	1.15315	0.205577
High	Master Protein	P00441	Superoxide dismutase [Cu-Zn] OS=Homo sapiens OX=9606 GN=SOD1 PE=1 SV=2	39	6	15.9	901.7	667.5	5.06004	5.8399	1.15412	0.206792
High	Master Protein	Q15121	Astrocytic phosphoprotein PEA-15 OS=Homo sapiens OX=9606 GN=PEA15 PE=1 SV=2	45	4	15	253.1	187.4	1.42031	1.63955	1.15435	0.207085
High	Master Protein	Q92688	Acidic leucine-rich nuclear phosphoprotein 32 family member B OS=Homo sapiens OX=9606 GN=ANP32B PE=1 SV=1	32	10	28.8	751.4	556.5	4.21661	4.86877	1.15466	0.207473
High	Master Protein	Q99714	3-hydroxyacyl-CoA dehydrogenase type-2 OS=Homo sapiens OX=9606 GN=HSD17B10 PE=1 SV=3	38	8	26.9	184	136.3	1.03255	1.19248	1.15489	0.207752
High	Master Protein	P23284	Peptidyl-prolyl cis-trans isomerase B OS=Homo sapiens OX=9606 GN=PPIB PE=1 SV=2	37	9	23.7	850.9	630.6	4.77497	5.51706	1.15541	0.208408
High	Master Protein	P30041	Peroxiredoxin-6 OS=Homo sapiens OX=9606 GN=PRDX6 PE=1 SV=3	50	12	25	707.7	524.6	3.97138	4.58968	1.15569	0.208752
High	Master Protein	Q9HC07	Transmembrane protein 165 OS=Homo sapiens OX=9606 GN=TMEM165 PE=1 SV=1	17	3	34.9	43.7	32.4	0.24523	0.283465	1.15591	0.209032
High	Master Protein	P55039	Developmentally-regulated GTP-binding protein 2 OS=Homo sapiens OX=9606 GN=DRG2 PE=1 SV=1	8	3	40.7	229.8	170.4	1.28956	1.49081	1.15606	0.209218
High	Master Protein	P35613	Basigin OS=Homo sapiens OX=9606 GN=BSG PE=1 SV=2	13	4	42.2	377.2	279.7	2.11672	2.44707	1.15606	0.209223
High	Master Protein	Q12792	Twinfilin-1 OS=Homo sapiens OX=9606 GN=TWF1 PE=1 SV=3	13	4	40.3	75.5	56	0.423681	0.489939	1.15639	0.209622
High	Master Protein	Q02338	D-beta-hydroxybutyrate dehydrogenase, mitochondrial OS=Homo sapiens OX=9606 GN=BDH1 PE=1 SV=3	5	2	38.1	70.5	52.3	0.395623	0.457568	1.15658	0.20986
High	Master Protein	Q9BTT0	Acidic leucine-rich nuclear phosphoprotein 32 family member E OS=Homo sapiens OX=9606 GN=ANP32E PE=1 SV=1	14	6	30.7	423.5	314.2	2.37654	2.74891	1.15668	0.209993
High	Master Protein	Q99623	Prohibitin-2 OS=Homo sapiens OX=9606 GN=PHB2 PE=1 SV=2	35	10	33.3	601.8	446.5	3.3771	3.90639	1.15673	0.210048
High	Master Protein	J3KNF8	Cytochrome b5 type B OS=Homo sapiens OX=9606 GN=CYB5B PE=1 SV=1	14	2	16.7	105.8	78.5	0.593715	0.686789	1.15677	0.210097
High	Master Protein	P17980	26S proteasome regulatory subunit 6A OS=Homo sapiens OX=9606 GN=PSMC3 PE=1 SV=3	26	10	49.2	697.6	517.6	3.9147	4.52843	1.15678	0.21011
High	Master Protein	P62314	Small nuclear ribonucleoprotein Sm D1 OS=Homo sapiens OX=9606 GN=SNRPD1 PE=1 SV=1	28	2	13.3	59.3	44	0.332772	0.384952	1.1568	0.210143
High	Master Protein	Q92599	Septin-8 OS=Homo sapiens OX=9606 GN=SEPT8 PE=1 SV=4	7	4	55.7	46.2	34.3	0.259259	0.300087	1.15748	0.210988
High	Master Protein	P62269	40S ribosomal protein S18 OS=Homo sapiens OX=9606 GN=RPS18 PE=1 SV=3	42	8	17.7	545.9	405.3	3.06341	3.54593	1.15751	0.211025
High	Master Protein	P04844	Dolichyl-diphosphooligosaccharide--protein glycosyltransferase subunit 2 OS=Homo sapiens OX=9606 GN=RPN2 PE=1 SV=3	8	4	69.2	205.5	152.6	1.1532	1.33508	1.15772	0.211289
High	Master Protein	Q8NC51	Plasminogen activator inhibitor 1 RNA-binding protein OS=Homo sapiens OX=9606 GN=SERBP1 PE=1 SV=2	20	7	44.9	617.8	458.8	3.46689	4.014	1.15781	0.211397
High	Master Protein	O95197	Reticulon-3 OS=Homo sapiens OX=9606 GN=RTN3 PE=1 SV=2	2	2	112.5	292.2	217	1.63973	1.89851	1.15782	0.211411
High	Master Protein	P09874	Poly [ADP-ribose] polymerase 1 OS=Homo sapiens OX=9606 GN=PARP1 PE=1 SV=4	20	17	113	730.2	542.3	4.09764	4.74453	1.15787	0.211471
High	Master Protein	Q9Y2W1	Thyroid hormone receptor-associated protein 3 OS=Homo sapiens OX=9606 GN=THRAP3 PE=1 SV=2	14	13	108.6	920.8	684.3	5.16723	5.98688	1.15862	0.212413
High	Master Protein	A0A0A0MTH3	Integrin-linked protein kinase OS=Homo sapiens OX=9606 GN=ILK PE=1 SV=1	9	4	54.6	181.1	134.6	1.01627	1.1776	1.15875	0.212564
High	Master Protein	Q9NPQ8	Synembryn-A OS=Homo sapiens OX=9606 GN=RIC8A PE=1 SV=3	8	3	59.7	59.2	44	0.332211	0.384952	1.15876	0.212578
High	Master Protein	Q6P2Q9	Pre-mRNA-processing-splicing factor 8 OS=Homo sapiens OX=9606 GN=PRPF8 PE=1 SV=2	11	21	273.4	662.8	492.8	3.71942	4.31146	1.15918	0.213101
High	Master Protein	H0YNJ6	GMP reductase OS=Homo sapiens OX=9606 GN=GMPR2 PE=1 SV=1	4	2	46.9	87	64.7	0.488215	0.566054	1.15944	0.213422
High	Master Protein	P50213	Isocitrate dehydrogenase [NAD] subunit alpha, mitochondrial OS=Homo sapiens OX=9606 GN=IDH3A PE=1 SV=1	10	4	39.6	154.2	114.7	0.86532	1.0035	1.15969	0.213735
High	Master Protein	P61026	Ras-related protein Rab-10 OS=Homo sapiens OX=9606 GN=RAB10 PE=1 SV=1	45	10	22.5	672.5	500.6	3.77385	4.3797	1.16054	0.214796
High	Master Protein	Q13098	COP9 signalosome complex subunit 1 OS=Homo sapiens OX=9606 GN=GPS1 PE=1 SV=4	8	4	55.5	67.7	50.4	0.37991	0.440945	1.16066	0.21494
High	Master Protein	P35232	Prohibitin OS=Homo sapiens OX=9606 GN=PHB PE=1 SV=1	40	10	29.8	623	463.8	3.49607	4.05774	1.16066	0.214943
High	Master Protein	P42704	Leucine-rich PPR motif-containing protein, mitochondrial OS=Homo sapiens OX=9606 GN=LRPPRC PE=1 SV=3	25	31	157.8	2153.4	1603.3	12.0842	14.0271	1.16078	0.2151
High	Master Protein	Q9C0E8	Endoplasmic reticulum junction formation protein lunapark OS=Homo sapiens OX=9606 GN=LNPK PE=1 SV=2	5	2	47.7	87	64.8	0.488215	0.566929	1.16123	0.21565
High	Master Protein	P18124	60S ribosomal protein L7 OS=Homo sapiens OX=9606 GN=RPL7 PE=1 SV=1	36	10	29.2	788.1	587.2	4.42256	5.13736	1.16163	0.216145
High	Master Protein	Q6PJT7	Zinc finger CCCH domain-containing protein 14 OS=Homo sapiens OX=9606 GN=ZC3H14 PE=1 SV=1	3	2	82.8	15.3	11.4	0.0858586	0.0997375	1.16165	0.216174
High	Master Protein	O14974	Protein phosphatase 1 regulatory subunit 12A OS=Homo sapiens OX=9606 GN=PPP1R12A PE=1 SV=1	8	7	115.2	189.2	141	1.06173	1.2336	1.16188	0.216455
High	Master Protein	G3V1V0	Myosin light polypeptide 6 OS=Homo sapiens OX=9606 GN=MYL6 PE=1 SV=1	73	10	18	796.4	593.6	4.46914	5.19335	1.16205	0.21667
High	Master Protein	Q14683	Structural maintenance of chromosomes protein 1A OS=Homo sapiens OX=9606 GN=SMC1A PE=1 SV=2	9	10	143.1	331.3	247	1.85915	2.16098	1.16235	0.217045
High	Master Protein	Q6L8Q7	2',5'-phosphodiesterase 12 OS=Homo sapiens OX=9606 GN=PDE12 PE=1 SV=2	7	3	67.3	90.5	67.5	0.507856	0.590551	1.16283	0.217642
High	Master Protein	Q13637	Ras-related protein Rab-32 OS=Homo sapiens OX=9606 GN=RAB32 PE=1 SV=3	16	3	25	178.3	133	1.00056	1.1636	1.16295	0.217791
High	Master Protein	Q12874	Splicing factor 3A subunit 3 OS=Homo sapiens OX=9606 GN=SF3A3 PE=1 SV=1	19	7	58.8	314.1	234.4	1.76263	2.05074	1.16346	0.218421
High	Master Protein	Q27J81	Inverted formin-2 OS=Homo sapiens OX=9606 GN=INF2 PE=1 SV=2	11	9	135.5	56.4	42.1	0.316498	0.368329	1.16376	0.218797
High	Master Protein	Q92783	Signal transducing adapter molecule 1 OS=Homo sapiens OX=9606 GN=STAM PE=1 SV=3	5	2	59.1	73.4	54.8	0.411897	0.47944	1.16398	0.219068
High	Master Protein	O60763	General vesicular transport factor p115 OS=Homo sapiens OX=9606 GN=USO1 PE=1 SV=2	9	6	107.8	226.3	169.1	1.26992	1.47944	1.16499	0.220312
High	Master Protein	Q9H583	HEAT repeat-containing protein 1 OS=Homo sapiens OX=9606 GN=HEATR1 PE=1 SV=3	1	2	242.2	110	82.2	0.617284	0.71916	1.16504	0.220379
High	Master Protein	P49756	RNA-binding protein 25 OS=Homo sapiens OX=9606 GN=RBM25 PE=1 SV=3	14	9	100.1	363.4	271.6	2.03928	2.3762	1.16522	0.220597
High	Master Protein	P60842	Eukaryotic initiation factor 4A-I OS=Homo sapiens OX=9606 GN=EIF4A1 PE=1 SV=1	58	22	46.1	1566.2	1170.7	8.789	10.2423	1.16536	0.220775
High	Master Protein	Q8WUM0	Nuclear pore complex protein Nup133 OS=Homo sapiens OX=9606 GN=NUP133 PE=1 SV=2	2	2	128.9	20.6	15.4	0.1156	0.134733	1.16551	0.220958
High	Master Protein	P28331	NADH-ubiquinone oxidoreductase 75 kDa subunit, mitochondrial OS=Homo sapiens OX=9606 GN=NDUFS1 PE=1 SV=3	7	3	79.4	42	31.4	0.23569	0.274716	1.16558	0.221047
High	Master Protein	P46783	40S ribosomal protein S10 OS=Homo sapiens OX=9606 GN=RPS10 PE=1 SV=1	48	9	18.9	874.9	654.3	4.90965	5.72441	1.16595	0.221506
High	Master Protein	O95816	BAG family molecular chaperone regulator 2 OS=Homo sapiens OX=9606 GN=BAG2 PE=1 SV=1	37	8	23.8	447.2	334.5	2.50954	2.92651	1.16615	0.221758
High	Master Protein	G3V5Z7	Proteasome subunit alpha type OS=Homo sapiens OX=9606 GN=PSMA6 PE=1 SV=1	44	10	28.1	530.9	397.2	2.97924	3.47507	1.16643	0.222097
High	Master Protein	Q13257	Mitotic spindle assembly checkpoint protein MAD2A OS=Homo sapiens OX=9606 GN=MAD2L1 PE=1 SV=1	20	3	23.5	95.3	71.3	0.534792	0.623797	1.16643	0.222098
High	Master Protein	P62241	40S ribosomal protein S8 OS=Homo sapiens OX=9606 GN=RPS8 PE=1 SV=2	46	8	24.2	559.8	418.9	3.14141	3.66492	1.16665	0.222366
High	Master Protein	Q9Y376	Calcium-binding protein 39 OS=Homo sapiens OX=9606 GN=CAB39 PE=1 SV=1	18	7	39.8	287.1	214.9	1.61111	1.88014	1.16698	0.222784
High	Master Protein	Q15642	Cdc42-interacting protein 4 OS=Homo sapiens OX=9606 GN=TRIP10 PE=1 SV=3	10	5	68.3	181	135.5	1.01571	1.18548	1.16714	0.222975
High	Master Protein	Q9H444	Charged multivesicular body protein 4b OS=Homo sapiens OX=9606 GN=CHMP4B PE=1 SV=1	8	2	24.9	20.3	15.2	0.113917	0.132983	1.16737	0.223264
High	Master Protein	P55265	Double-stranded RNA-specific adenosine deaminase OS=Homo sapiens OX=9606 GN=ADAR PE=1 SV=4	5	6	136	277.7	208	1.55836	1.81977	1.16775	0.223728
High	Master Protein	Q9BXP5	Serrate RNA effector molecule homolog OS=Homo sapiens OX=9606 GN=SRRT PE=1 SV=1	10	8	100.6	325.4	243.8	1.82604	2.13298	1.16809	0.224156
High	Master Protein	E9PI68	Signal peptidase complex subunit 2 OS=Homo sapiens OX=9606 GN=SPCS2 PE=1 SV=1	13	3	28.5	136.5	102.3	0.765993	0.895013	1.16843	0.224577
High	Master Protein	M0QYS1	60S ribosomal protein L13a (Fragment) OS=Homo sapiens OX=9606 GN=RPL13A PE=1 SV=2	38	9	24.2	677.6	508	3.80247	4.44444	1.16883	0.225067
High	Master Protein	P43121	Cell surface glycoprotein MUC18 OS=Homo sapiens OX=9606 GN=MCAM PE=1 SV=2	7	4	71.6	105.6	79.2	0.592593	0.692913	1.16929	0.225634
High	Master Protein	X6R8A1	Carboxypeptidase OS=Homo sapiens OX=9606 GN=CTSA PE=1 SV=1	9	4	56.2	226.3	169.8	1.26992	1.48556	1.16981	0.226272
High	Master Protein	A0A087X117	Nodal modulator 1 OS=Homo sapiens OX=9606 GN=NOMO1 PE=1 SV=1	3	3	139.4	70.5	52.9	0.395623	0.462817	1.16984	0.226316
High	Master Protein	P17987	T-complex protein 1 subunit alpha OS=Homo sapiens OX=9606 GN=TCP1 PE=1 SV=1	29	17	60.3	1393.3	1045.6	7.81874	9.14786	1.16999	0.226497
High	Master Protein	A6NEM2	Host cell factor 1 OS=Homo sapiens OX=9606 GN=HCFC1 PE=1 SV=2	2	4	213.3	98.7	74.1	0.553872	0.648294	1.17048	0.227095
High	Master Protein	D6W592	Heterogeneous nuclear ribonucleoprotein L-like OS=Homo sapiens OX=9606 GN=HNRNPLL PE=1 SV=1	8	3	60.1	87.1	65.4	0.488777	0.572178	1.17063	0.22729
High	Master Protein	P54727	UV excision repair protein RAD23 homolog B OS=Homo sapiens OX=9606 GN=RAD23B PE=1 SV=1	22	7	43.1	509.2	382.4	2.85746	3.34558	1.17082	0.227522
High	Master Protein	Q96FJ2	Dynein light chain 2, cytoplasmic OS=Homo sapiens OX=9606 GN=DYNLL2 PE=1 SV=1	20	2	10.3	69.5	52.2	0.390011	0.456693	1.17097	0.227709
High	Master Protein	Q9UHX1	Poly(U)-binding-splicing factor PUF60 OS=Homo sapiens OX=9606 GN=PUF60 PE=1 SV=1	10	5	59.8	95.8	72	0.537598	0.629921	1.17173	0.228643
High	Master Protein	O43390	Heterogeneous nuclear ribonucleoprotein R OS=Homo sapiens OX=9606 GN=HNRNPR PE=1 SV=1	28	16	70.9	724.1	544.3	4.06341	4.76203	1.17193	0.228885
High	Master Protein	P23381	Tryptophan--tRNA ligase, cytoplasmic OS=Homo sapiens OX=9606 GN=WARS PE=1 SV=2	18	7	53.1	447.4	336.4	2.51066	2.94313	1.17225	0.229284
High	Master Protein	O75351	Vacuolar protein sorting-associated protein 4B OS=Homo sapiens OX=9606 GN=VPS4B PE=1 SV=2	15	6	49.3	519.7	390.8	2.91639	3.41907	1.17237	0.229423
High	Master Protein	P62899	60S ribosomal protein L31 OS=Homo sapiens OX=9606 GN=RPL31 PE=1 SV=1	35	6	14.5	1011	760.3	5.6734	6.65179	1.17245	0.22953
High	Master Protein	Q9NVJ2	ADP-ribosylation factor-like protein 8B OS=Homo sapiens OX=9606 GN=ARL8B PE=1 SV=1	37	5	21.5	234.8	176.6	1.31762	1.54506	1.17261	0.229725
High	Master Protein	P51858	Hepatoma-derived growth factor OS=Homo sapiens OX=9606 GN=HDGF PE=1 SV=1	46	11	26.8	667.4	502	3.74523	4.39195	1.17268	0.229808
High	Master Protein	Q13200	26S proteasome non-ATPase regulatory subunit 2 OS=Homo sapiens OX=9606 GN=PSMD2 PE=1 SV=3	27	18	100.1	1432.9	1077.8	8.04097	9.42957	1.17269	0.229823
High	Master Protein	P15924	Desmoplakin OS=Homo sapiens OX=9606 GN=DSP PE=1 SV=3	3	10	331.6	180	135.4	1.0101	1.1846	1.17276	0.229903
High	Master Protein	P37108	Signal recognition particle 14 kDa protein OS=Homo sapiens OX=9606 GN=SRP14 PE=1 SV=2	36	4	14.6	107.4	80.8	0.602694	0.706912	1.17292	0.230105
High	Master Protein	O94906	Pre-mRNA-processing factor 6 OS=Homo sapiens OX=9606 GN=PRPF6 PE=1 SV=1	5	5	106.9	170.8	128.5	0.958474	1.12423	1.17294	0.230132
High	Master Protein	Q16204	Coiled-coil domain-containing protein 6 OS=Homo sapiens OX=9606 GN=CCDC6 PE=1 SV=2	14	4	53.3	115.5	86.9	0.648148	0.76028	1.173	0.230207
High	Master Protein	Q96KR1	Zinc finger RNA-binding protein OS=Homo sapiens OX=9606 GN=ZFR PE=1 SV=2	3	4	116.9	71.9	54.1	0.403479	0.473316	1.17309	0.230309
High	Master Protein	P25789	Proteasome subunit alpha type-4 OS=Homo sapiens OX=9606 GN=PSMA4 PE=1 SV=1	35	8	29.5	416.8	313.7	2.33895	2.74453	1.17341	0.230702
High	Master Protein	Q9BUJ2	Heterogeneous nuclear ribonucleoprotein U-like protein 1 OS=Homo sapiens OX=9606 GN=HNRNPUL1 PE=1 SV=2	15	11	95.7	398.8	300.2	2.23793	2.62642	1.17359	0.230931
High	Master Protein	P51570	Galactokinase OS=Homo sapiens OX=9606 GN=GALK1 PE=1 SV=1	5	2	42.2	45.8	34.5	0.257015	0.301837	1.1744	0.231921
High	Master Protein	P52701	DNA mismatch repair protein Msh6 OS=Homo sapiens OX=9606 GN=MSH6 PE=1 SV=2	6	7	152.7	168	126.6	0.942761	1.10761	1.17486	0.232488
High	Master Protein	Q9UKV3	Apoptotic chromatin condensation inducer in the nucleus OS=Homo sapiens OX=9606 GN=ACIN1 PE=1 SV=2	9	12	151.8	292.6	220.5	1.64198	1.92913	1.17489	0.232521
High	Master Protein	Q13243	Serine/arginine-rich splicing factor 5 OS=Homo sapiens OX=9606 GN=SRSF5 PE=1 SV=1	13	3	31.2	13.4	10.1	0.0751964	0.088364	1.17511	0.232794
High	Master Protein	A0A024R4M0	40S ribosomal protein S9 OS=Homo sapiens OX=9606 GN=RPS9 PE=1 SV=1	42	10	22.6	863.7	651	4.8468	5.69554	1.17511	0.232799
High	Master Protein	F8VVA7	Coatomer subunit zeta-1 OS=Homo sapiens OX=9606 GN=COPZ1 PE=1 SV=1	20	3	22.3	155.6	117.3	0.873176	1.02625	1.1753	0.233033
High	Master Protein	P07954	Fumarate hydratase, mitochondrial OS=Homo sapiens OX=9606 GN=FH PE=1 SV=3	23	9	54.6	181.3	136.7	1.0174	1.19598	1.17553	0.233306
High	Master Protein	P62249	40S ribosomal protein S16 OS=Homo sapiens OX=9606 GN=RPS16 PE=1 SV=2	38	7	16.4	409.9	309.1	2.30022	2.70429	1.17566	0.233474
High	Master Protein	F5GYJ8	Ubiquitin thioesterase OTUB1 OS=Homo sapiens OX=9606 GN=OTUB1 PE=1 SV=1	19	5	32.3	323.5	244	1.81538	2.13473	1.17592	0.233787
High	Master Protein	P61254	60S ribosomal protein L26 OS=Homo sapiens OX=9606 GN=RPL26 PE=1 SV=1	22	4	17.2	420.7	317.6	2.36083	2.77865	1.17698	0.235091
High	Master Protein	Q13242	Serine/arginine-rich splicing factor 9 OS=Homo sapiens OX=9606 GN=SRSF9 PE=1 SV=1	14	3	25.5	173.5	131	0.973625	1.14611	1.17715	0.235303
High	Master Protein	J3KN01	Afadin OS=Homo sapiens OX=9606 GN=AFDN PE=1 SV=1	5	9	207.5	203	153.3	1.13917	1.34121	1.17736	0.23555
High	Master Protein	O43615	Mitochondrial import inner membrane translocase subunit TIM44 OS=Homo sapiens OX=9606 GN=TIMM44 PE=1 SV=2	17	7	51.3	328.7	248.3	1.84456	2.17235	1.17771	0.235985
High	Master Protein	P43034	Platelet-activating factor acetylhydrolase IB subunit alpha OS=Homo sapiens OX=9606 GN=PAFAH1B1 PE=1 SV=2	13	6	46.6	166	125.4	0.931538	1.09711	1.17774	0.236026
High	Master Protein	P16104	Histone H2AX OS=Homo sapiens OX=9606 GN=H2AFX PE=1 SV=2	43	8	15.1	773.7	584.7	4.34175	5.11549	1.17821	0.236594
High	Master Protein	P05556	Integrin beta-1 OS=Homo sapiens OX=9606 GN=ITGB1 PE=1 SV=2	28	24	88.4	1176.3	889.2	6.60101	7.77953	1.17854	0.236996
High	Master Protein	Q9H993	Protein-glutamate O-methyltransferase OS=Homo sapiens OX=9606 GN=ARMT1 PE=1 SV=1	10	4	51.1	243.8	184.3	1.36813	1.61242	1.17856	0.23703
High	Master Protein	O75368	SH3 domain-binding glutamic acid-rich-like protein OS=Homo sapiens OX=9606 GN=SH3BGRL PE=1 SV=1	54	5	12.8	86.9	65.7	0.487654	0.574803	1.17871	0.237209
High	Master Protein	O96019	Actin-like protein 6A OS=Homo sapiens OX=9606 GN=ACTL6A PE=1 SV=1	8	3	47.4	126.8	95.9	0.71156	0.83902	1.17913	0.23772
High	Master Protein	Q9UMS4	Pre-mRNA-processing factor 19 OS=Homo sapiens OX=9606 GN=PRPF19 PE=1 SV=1	19	9	55.1	406.3	307.3	2.28002	2.68854	1.17917	0.237774
High	Master Protein	Q5T9A4	ATPase family AAA domain-containing protein 3B OS=Homo sapiens OX=9606 GN=ATAD3B PE=1 SV=1	9	6	72.5	189.3	143.2	1.06229	1.25284	1.17938	0.238029
High	Master Protein	O43765	Small glutamine-rich tetratricopeptide repeat-containing protein alpha OS=Homo sapiens OX=9606 GN=SGTA PE=1 SV=1	11	3	34	138.8	105	0.7789	0.918635	1.1794	0.238054
High	Master Protein	P35606	Coatomer subunit beta' OS=Homo sapiens OX=9606 GN=COPB2 PE=1 SV=2	9	9	102.4	763.7	577.8	4.28563	5.05512	1.17955	0.238236
High	Master Protein	Q8IUI8	Cytokine receptor-like factor 3 OS=Homo sapiens OX=9606 GN=CRLF3 PE=1 SV=2	5	2	49.7	32.9	24.9	0.184624	0.217848	1.17995	0.23873
High	Master Protein	P54578	Ubiquitin carboxyl-terminal hydrolase 14 OS=Homo sapiens OX=9606 GN=USP14 PE=1 SV=3	33	16	56	645.7	488.9	3.62346	4.27734	1.18046	0.239347
High	Master Protein	O95218	Zinc finger Ran-binding domain-containing protein 2 OS=Homo sapiens OX=9606 GN=ZRANB2 PE=1 SV=2	8	2	37.4	65.1	49.3	0.36532	0.431321	1.18067	0.239602
High	Master Protein	Q13045	Protein flightless-1 homolog OS=Homo sapiens OX=9606 GN=FLII PE=1 SV=2	4	4	144.7	436.1	330.3	2.44725	2.88976	1.18082	0.23979
High	Master Protein	M0QXB5	Persulfide dioxygenase ETHE1, mitochondrial OS=Homo sapiens OX=9606 GN=ETHE1 PE=1 SV=1	10	2	28.4	33.8	25.6	0.189675	0.223972	1.18082	0.239792
High	Master Protein	Q9Y3I0	tRNA-splicing ligase RtcB homolog OS=Homo sapiens OX=9606 GN=RTCB PE=1 SV=1	21	8	55.2	256.4	194.2	1.43883	1.69904	1.18084	0.239819
High	Master Protein	P13797	Plastin-3 OS=Homo sapiens OX=9606 GN=PLS3 PE=1 SV=4	41	23	70.8	1164.8	882.3	6.53648	7.71916	1.18094	0.239931
High	Master Protein	A0A087WUT6	Eukaryotic translation initiation factor 5B OS=Homo sapiens OX=9606 GN=EIF5B PE=1 SV=1	9	7	138.6	153.8	116.5	0.863075	1.01925	1.18095	0.239946
High	Master Protein	Q9UHY7	Enolase-phosphatase E1 OS=Homo sapiens OX=9606 GN=ENOPH1 PE=1 SV=1	12	2	28.9	39.6	30	0.222222	0.262467	1.1811	0.240134
High	Master Protein	Q13813	Spectrin alpha chain, non-erythrocytic 1 OS=Homo sapiens OX=9606 GN=SPTAN1 PE=1 SV=3	37	79	284.4	4128.3	3127.9	23.1667	27.3657	1.18125	0.240319
High	Master Protein	P35998	26S proteasome regulatory subunit 7 OS=Homo sapiens OX=9606 GN=PSMC2 PE=1 SV=3	32	14	48.6	937.1	710.3	5.2587	6.21435	1.18173	0.240897
High	Master Protein	O00567	Nucleolar protein 56 OS=Homo sapiens OX=9606 GN=NOP56 PE=1 SV=4	19	10	66	270.8	205.3	1.51964	1.79615	1.18196	0.241178
High	Master Protein	Q9HB71	Calcyclin-binding protein OS=Homo sapiens OX=9606 GN=CACYBP PE=1 SV=2	54	11	26.2	742.6	563	4.16723	4.92563	1.18199	0.241222
High	Master Protein	J3KTL2	Serine/arginine-rich-splicing factor 1 OS=Homo sapiens OX=9606 GN=SRSF1 PE=1 SV=1	40	9	28.3	363.7	275.8	2.04097	2.41295	1.18226	0.241545
High	Master Protein	Q9Y6G9	Cytoplasmic dynein 1 light intermediate chain 1 OS=Homo sapiens OX=9606 GN=DYNC1LI1 PE=1 SV=3	22	7	56.5	253.9	192.6	1.4248	1.68504	1.18265	0.242019
High	Master Protein	Q9BVK6	Transmembrane emp24 domain-containing protein 9 OS=Homo sapiens OX=9606 GN=TMED9 PE=1 SV=2	46	11	27.3	353.5	268.2	1.98373	2.34646	1.18285	0.242271
High	Master Protein	P62191	26S proteasome regulatory subunit 4 OS=Homo sapiens OX=9606 GN=PSMC1 PE=1 SV=1	26	9	49.2	574.5	435.9	3.22391	3.81365	1.18293	0.242362
High	Master Protein	Q09028	Histone-binding protein RBBP4 OS=Homo sapiens OX=9606 GN=RBBP4 PE=1 SV=3	23	9	47.6	686.4	520.9	3.85185	4.55731	1.18315	0.242629
High	Master Protein	O95347	Structural maintenance of chromosomes protein 2 OS=Homo sapiens OX=9606 GN=SMC2 PE=1 SV=2	20	21	135.6	562.4	426.8	3.156	3.73403	1.18315	0.242636
High	Master Protein	P53621	Coatomer subunit alpha OS=Homo sapiens OX=9606 GN=COPA PE=1 SV=2	20	22	138.3	989.7	751.2	5.55387	6.57218	1.18335	0.242878
High	Master Protein	P16278	Beta-galactosidase OS=Homo sapiens OX=9606 GN=GLB1 PE=1 SV=2	6	3	76	30.3	23	0.170034	0.201225	1.18344	0.242988
High	Master Protein	O00541	Pescadillo homolog OS=Homo sapiens OX=9606 GN=PES1 PE=1 SV=1	4	3	68	121.7	92.4	0.682941	0.808399	1.1837	0.243308
High	Master Protein	O00233	26S proteasome non-ATPase regulatory subunit 9 OS=Homo sapiens OX=9606 GN=PSMD9 PE=1 SV=3	9	2	24.7	194	147.3	1.08866	1.28871	1.18376	0.243373
High	Master Protein	Q8WZA9	Immunity-related GTPase family Q protein OS=Homo sapiens OX=9606 GN=IRGQ PE=1 SV=1	6	3	62.7	56.1	42.6	0.314815	0.372703	1.18388	0.243525
High	Master Protein	P26038	Moesin OS=Homo sapiens OX=9606 GN=MSN PE=1 SV=3	59	40	67.8	3059.5	2324.8	17.1689	20.3395	1.18467	0.244483
High	Master Protein	P22307	Non-specific lipid-transfer protein OS=Homo sapiens OX=9606 GN=SCP2 PE=1 SV=2	7	4	59	215	163.4	1.20651	1.42957	1.18488	0.244743
High	Master Protein	P23919	Thymidylate kinase OS=Homo sapiens OX=9606 GN=DTYMK PE=1 SV=4	20	5	23.8	279.2	212.2	1.56678	1.85652	1.18493	0.244798
High	Master Protein	P17858	ATP-dependent 6-phosphofructokinase, liver type OS=Homo sapiens OX=9606 GN=PFKL PE=1 SV=6	9	8	85	201	152.8	1.12795	1.33683	1.18519	0.245121
High	Master Protein	O75190	DnaJ homolog subfamily B member 6 OS=Homo sapiens OX=9606 GN=DNAJB6 PE=1 SV=2	9	2	36.1	85.5	65	0.479798	0.568679	1.18525	0.245187
High	Master Protein	P38646	Stress-70 protein, mitochondrial OS=Homo sapiens OX=9606 GN=HSPA9 PE=1 SV=2	53	31	73.6	1864.6	1417.6	10.4635	12.4024	1.1853	0.245256
High	Master Protein	P60709	Actin, cytoplasmic 1 OS=Homo sapiens OX=9606 GN=ACTB PE=1 SV=1	61	107	41.7	7854.5	5973	44.0769	52.2572	1.18559	0.245608
High	Master Protein	J3KN16	Ecm29 proteasome adaptor and scaffold OS=Homo sapiens OX=9606 GN=ECPAS PE=1 SV=1	4	6	223.6	79.8	60.7	0.447811	0.531059	1.1859	0.24598
High	Master Protein	P62424	60S ribosomal protein L7a OS=Homo sapiens OX=9606 GN=RPL7A PE=1 SV=2	47	12	30	1170.4	890.3	6.5679	7.78915	1.18594	0.246034
High	Master Protein	Q9NVP1	ATP-dependent RNA helicase DDX18 OS=Homo sapiens OX=9606 GN=DDX18 PE=1 SV=2	4	3	75.4	37.2	28.3	0.208754	0.247594	1.18606	0.246171
High	Master Protein	O60664	Perilipin-3 OS=Homo sapiens OX=9606 GN=PLIN3 PE=1 SV=3	37	13	47	547.5	416.8	3.07239	3.64654	1.18688	0.247168
High	Master Protein	H0Y449	Nuclease-sensitive element-binding protein 1 (Fragment) OS=Homo sapiens OX=9606 GN=YBX1 PE=1 SV=1	40	12	42	808.5	615.5	4.53704	5.38495	1.18689	0.247183
High	Master Protein	Q15293	Reticulocalbin-1 OS=Homo sapiens OX=9606 GN=RCN1 PE=1 SV=1	19	7	38.9	313.8	238.9	1.76094	2.09011	1.18693	0.247233
High	Master Protein	Q96QK1	Vacuolar protein sorting-associated protein 35 OS=Homo sapiens OX=9606 GN=VPS35 PE=1 SV=2	15	11	91.6	482.6	367.5	2.70819	3.21522	1.18722	0.247588
High	Master Protein	Q9UDW1	Cytochrome b-c1 complex subunit 9 OS=Homo sapiens OX=9606 GN=UQCR10 PE=1 SV=3	38	2	7.3	91	69.3	0.510662	0.606299	1.18728	0.247661
High	Master Protein	Q12769	Nuclear pore complex protein Nup160 OS=Homo sapiens OX=9606 GN=NUP160 PE=1 SV=3	5	5	162	109.6	83.5	0.615039	0.730534	1.18778	0.248272
High	Master Protein	O75439	Mitochondrial-processing peptidase subunit beta OS=Homo sapiens OX=9606 GN=PMPCB PE=1 SV=2	8	3	54.3	181.1	138	1.01627	1.20735	1.18802	0.248554
High	Master Protein	P48047	ATP synthase subunit O, mitochondrial OS=Homo sapiens OX=9606 GN=ATP5O PE=1 SV=1	20	3	23.3	138.6	105.7	0.777778	0.924759	1.18898	0.24972
High	Master Protein	P29966	Myristoylated alanine-rich C-kinase substrate OS=Homo sapiens OX=9606 GN=MARCKS PE=1 SV=4	45	8	31.5	549.3	419	3.08249	3.66579	1.18923	0.250028
High	Master Protein	P62280	40S ribosomal protein S11 OS=Homo sapiens OX=9606 GN=RPS11 PE=1 SV=3	39	7	18.4	492.5	375.7	2.76375	3.28696	1.18931	0.250129
High	Master Protein	Q9ULV4	Coronin-1C OS=Homo sapiens OX=9606 GN=CORO1C PE=1 SV=1	18	10	53.2	647.9	494.3	3.6358	4.32458	1.18944	0.250288
High	Master Protein	A8MXP9	Matrin-3 OS=Homo sapiens OX=9606 GN=MATR3 PE=1 SV=1	17	15	99.9	494	376.9	2.77217	3.29746	1.18949	0.250343
High	Master Protein	O95782	AP-2 complex subunit alpha-1 OS=Homo sapiens OX=9606 GN=AP2A1 PE=1 SV=3	15	15	107.5	782.3	596.9	4.39001	5.22222	1.18957	0.250439
High	Master Protein	P67936	Tropomyosin alpha-4 chain OS=Homo sapiens OX=9606 GN=TPM4 PE=1 SV=3	48	17	28.5	1211.1	924.1	6.7963	8.08486	1.1896	0.250475
High	Master Protein	P62316	Small nuclear ribonucleoprotein Sm D2 OS=Homo sapiens OX=9606 GN=SNRPD2 PE=1 SV=1	47	5	13.5	360.2	274.9	2.02132	2.40507	1.18985	0.250781
High	Master Protein	P61224	Ras-related protein Rap-1b OS=Homo sapiens OX=9606 GN=RAP1B PE=1 SV=1	49	8	20.8	505.7	386	2.83782	3.37708	1.19002	0.250991
High	Master Protein	P40939	Trifunctional enzyme subunit alpha, mitochondrial OS=Homo sapiens OX=9606 GN=HADHA PE=1 SV=2	24	17	82.9	668.3	510.2	3.75028	4.46369	1.19023	0.251239
High	Master Protein	M0QXB4	Coatomer protein complex, subunit epsilon, isoform CRA_g OS=Homo sapiens OX=9606 GN=COPE PE=1 SV=1	18	4	36.9	120.5	92	0.676207	0.804899	1.19032	0.251345
High	Master Protein	O00429	Dynamin-1-like protein OS=Homo sapiens OX=9606 GN=DNM1L PE=1 SV=2	13	8	81.8	237.7	181.5	1.33389	1.58793	1.19044	0.2515
High	Master Protein	Q5SQP8	C-terminal-binding protein 2 OS=Homo sapiens OX=9606 GN=CTBP2 PE=1 SV=1	3	2	56.1	77.1	58.9	0.43266	0.515311	1.19103	0.252209
High	Master Protein	B7ZLQ5	Probable global transcription activator SNF2L1 OS=Homo sapiens OX=9606 GN=SMARCA1 PE=1 SV=1	4	5	124.2	120.9	92.4	0.678451	0.808399	1.19154	0.252822
High	Master Protein	P22087	rRNA 2'-O-methyltransferase fibrillarin OS=Homo sapiens OX=9606 GN=FBL PE=1 SV=2	17	5	33.8	705.9	539.5	3.96128	4.72003	1.19154	0.252831
High	Master Protein	P63151	Serine/threonine-protein phosphatase 2A 55 kDa regulatory subunit B alpha isoform OS=Homo sapiens OX=9606 GN=PPP2R2A PE=1 SV=1	12	4	51.7	136.3	104.2	0.764871	0.911636	1.19188	0.253242
High	Master Protein	Q8N163	Cell cycle and apoptosis regulator protein 2 OS=Homo sapiens OX=9606 GN=CCAR2 PE=1 SV=2	7	6	102.8	86.2	65.9	0.483726	0.576553	1.1919	0.253263
High	Master Protein	P12956	X-ray repair cross-complementing protein 6 OS=Homo sapiens OX=9606 GN=XRCC6 PE=1 SV=2	42	25	69.8	1631.9	1247.6	9.15769	10.9151	1.19191	0.253275
High	Master Protein	Q9Y4L1	Hypoxia up-regulated protein 1 OS=Homo sapiens OX=9606 GN=HYOU1 PE=1 SV=1	26	22	111.3	1623.8	1241.9	9.11223	10.8653	1.19238	0.253847
High	Master Protein	Q4V328	GRIP1-associated protein 1 OS=Homo sapiens OX=9606 GN=GRIPAP1 PE=1 SV=1	3	2	95.9	117	89.5	0.656566	0.783027	1.19261	0.254123
High	Master Protein	Q92905	COP9 signalosome complex subunit 5 OS=Homo sapiens OX=9606 GN=COPS5 PE=1 SV=4	8	2	37.6	108.1	82.7	0.606622	0.723535	1.19273	0.254265
High	Master Protein	P54725	UV excision repair protein RAD23 homolog A OS=Homo sapiens OX=9606 GN=RAD23A PE=1 SV=1	13	3	39.6	29.8	22.8	0.167228	0.199475	1.19283	0.254393
High	Master Protein	Q9NVG8	TBC1 domain family member 13 OS=Homo sapiens OX=9606 GN=TBC1D13 PE=1 SV=3	11	3	46.5	24.7	18.9	0.138608	0.165354	1.19296	0.254547
High	Master Protein	Q9UKD2	mRNA turnover protein 4 homolog OS=Homo sapiens OX=9606 GN=MRTO4 PE=1 SV=2	33	6	27.5	191.2	146.4	1.07295	1.28084	1.19375	0.255505
High	Master Protein	P49792	E3 SUMO-protein ligase RanBP2 OS=Homo sapiens OX=9606 GN=RANBP2 PE=1 SV=2	1	3	358	53.4	40.9	0.299663	0.35783	1.19411	0.255933
High	Master Protein	Q9UGI8	Testin OS=Homo sapiens OX=9606 GN=TES PE=1 SV=1	27	9	48	263.1	201.6	1.47643	1.76378	1.19462	0.256556
High	Master Protein	P14866	Heterogeneous nuclear ribonucleoprotein L OS=Homo sapiens OX=9606 GN=HNRNPL PE=1 SV=2	32	17	64.1	1081.5	828.8	6.06902	7.25109	1.19477	0.256734
High	Master Protein	P22626	Heterogeneous nuclear ribonucleoproteins A2/B1 OS=Homo sapiens OX=9606 GN=HNRNPA2B1 PE=1 SV=2	55	30	37.4	2502.6	1917.9	14.0438	16.7795	1.1948	0.256772
High	Master Protein	P51398	28S ribosomal protein S29, mitochondrial OS=Homo sapiens OX=9606 GN=DAP3 PE=1 SV=1	6	2	45.5	24.4	18.7	0.136925	0.163605	1.19485	0.256829
High	Master Protein	Q96IJ6	Mannose-1-phosphate guanyltransferase alpha OS=Homo sapiens OX=9606 GN=GMPPA PE=1 SV=1	7	2	46.3	50.2	38.5	0.281706	0.336833	1.19569	0.257843
High	Master Protein	P09012	U1 small nuclear ribonucleoprotein A OS=Homo sapiens OX=9606 GN=SNRPA PE=1 SV=3	18	5	31.3	292.3	224.2	1.64029	1.9615	1.19583	0.258008
High	Master Protein	P20618	Proteasome subunit beta type-1 OS=Homo sapiens OX=9606 GN=PSMB1 PE=1 SV=2	28	6	26.5	176.5	135.4	0.99046	1.1846	1.19601	0.258231
High	Master Protein	B3KS98	Eukaryotic translation initiation factor 3 subunit H OS=Homo sapiens OX=9606 GN=EIF3H PE=1 SV=1	40	12	41.6	427.9	328.3	2.40123	2.87227	1.19616	0.258413
High	Master Protein	Q04323	UBX domain-containing protein 1 OS=Homo sapiens OX=9606 GN=UBXN1 PE=1 SV=2	6	2	33.3	15.9	12.2	0.0892256	0.106737	1.19626	0.258526
High	Master Protein	Q13492	Phosphatidylinositol-binding clathrin assembly protein OS=Homo sapiens OX=9606 GN=PICALM PE=1 SV=2	8	5	70.7	206.7	158.6	1.15993	1.38758	1.19626	0.258526
High	Master Protein	P54920	Alpha-soluble NSF attachment protein OS=Homo sapiens OX=9606 GN=NAPA PE=1 SV=3	27	6	33.2	279.8	214.7	1.57015	1.87839	1.19632	0.258598
High	Master Protein	P51116	Fragile X mental retardation syndrome-related protein 2 OS=Homo sapiens OX=9606 GN=FXR2 PE=1 SV=2	11	6	74.2	38.7	29.7	0.217172	0.259843	1.19648	0.258801
High	Master Protein	Q02543	60S ribosomal protein L18a OS=Homo sapiens OX=9606 GN=RPL18A PE=1 SV=2	30	6	20.7	880.9	676.3	4.94332	5.91689	1.19695	0.259357
High	Master Protein	P62979	Ubiquitin-40S ribosomal protein S27a OS=Homo sapiens OX=9606 GN=RPS27A PE=1 SV=2	42	12	18	1169.5	897.9	6.56285	7.85564	1.19699	0.259407
High	Master Protein	X6R4W8	BUB3-interacting and GLEBS motif-containing protein ZNF207 OS=Homo sapiens OX=9606 GN=ZNF207 PE=1 SV=1	5	2	52.6	65.9	50.6	0.369809	0.442695	1.19709	0.259531
High	Master Protein	P42166	Lamina-associated polypeptide 2, isoform alpha OS=Homo sapiens OX=9606 GN=TMPO PE=1 SV=2	24	12	75.4	234.3	180	1.31481	1.5748	1.19774	0.260312
High	Master Protein	Q96JJ7	Protein disulfide-isomerase TMX3 OS=Homo sapiens OX=9606 GN=TMX3 PE=1 SV=2	4	2	51.8	32.8	25.2	0.184063	0.220472	1.19781	0.2604
High	Master Protein	M0QYZ2	AP complex subunit sigma OS=Homo sapiens OX=9606 GN=AP2S1 PE=1 SV=1	12	2	18.9	124.3	95.5	0.697531	0.835521	1.19783	0.260418
High	Master Protein	H7C2N1	Prothymosin alpha (Fragment) OS=Homo sapiens OX=9606 GN=PTMA PE=1 SV=1	17	5	15.8	450.5	346.3	2.52806	3.02975	1.19845	0.261167
High	Master Protein	Q9UHQ9	NADH-cytochrome b5 reductase 1 OS=Homo sapiens OX=9606 GN=CYB5R1 PE=1 SV=1	8	2	34.1	67.9	52.2	0.381033	0.456693	1.19857	0.26131
High	Master Protein	P84095	Rho-related GTP-binding protein RhoG OS=Homo sapiens OX=9606 GN=RHOG PE=1 SV=1	35	5	21.3	92.6	71.2	0.519641	0.622922	1.19876	0.261537
High	Master Protein	E7EUC7	UTP--glucose-1-phosphate uridylyltransferase OS=Homo sapiens OX=9606 GN=UGP2 PE=1 SV=1	27	12	57.8	887.3	682.3	4.97924	5.96938	1.19885	0.261656
High	Master Protein	P15170	Eukaryotic peptide chain release factor GTP-binding subunit ERF3A OS=Homo sapiens OX=9606 GN=GSPT1 PE=1 SV=1	22	8	55.7	550.7	423.5	3.09035	3.70516	1.19895	0.261767
High	Master Protein	P48556	26S proteasome non-ATPase regulatory subunit 8 OS=Homo sapiens OX=9606 GN=PSMD8 PE=1 SV=2	18	7	39.6	318.3	244.9	1.7862	2.14261	1.19954	0.262478
High	Master Protein	Q9UL25	Ras-related protein Rab-21 OS=Homo sapiens OX=9606 GN=RAB21 PE=1 SV=3	10	2	24.3	68.1	52.4	0.382155	0.458443	1.19963	0.262584
High	Master Protein	P62917	60S ribosomal protein L8 OS=Homo sapiens OX=9606 GN=RPL8 PE=1 SV=2	32	9	28	976.7	751.7	5.48092	6.57655	1.1999	0.262913
High	Master Protein	P21980	Protein-glutamine gamma-glutamyltransferase 2 OS=Homo sapiens OX=9606 GN=TGM2 PE=1 SV=2	29	17	77.3	945.1	727.6	5.30359	6.3657	1.20026	0.26335
High	Master Protein	P78347	General transcription factor II-I OS=Homo sapiens OX=9606 GN=GTF2I PE=1 SV=2	10	9	112.3	358.5	276	2.01178	2.4147	1.20028	0.263367
High	Master Protein	Q9UHD1	Cysteine and histidine-rich domain-containing protein 1 OS=Homo sapiens OX=9606 GN=CHORDC1 PE=1 SV=2	15	4	37.5	134.3	103.4	0.753648	0.904637	1.20034	0.263449
High	Master Protein	Q04837	Single-stranded DNA-binding protein, mitochondrial OS=Homo sapiens OX=9606 GN=SSBP1 PE=1 SV=1	28	3	17.2	104.4	80.4	0.585859	0.703412	1.20065	0.263818
High	Master Protein	A0A0A0MRR7	U1 small nuclear ribonucleoprotein C OS=Homo sapiens OX=9606 GN=SNRPC PE=1 SV=1	12	2	19.7	78.3	60.3	0.439394	0.527559	1.20065	0.263818
High	Master Protein	O60884	DnaJ homolog subfamily A member 2 OS=Homo sapiens OX=9606 GN=DNAJA2 PE=1 SV=1	16	6	45.7	498.6	384.1	2.79798	3.36045	1.20103	0.264271
High	Master Protein	Q9NZB2	Constitutive coactivator of PPAR-gamma-like protein 1 OS=Homo sapiens OX=9606 GN=FAM120A PE=1 SV=2	9	7	121.8	213	164.1	1.19529	1.4357	1.20113	0.264394
High	Master Protein	Q5T1Z8	Pumilio homolog 1 OS=Homo sapiens OX=9606 GN=PUM1 PE=1 SV=1	2	2	130	115	88.6	0.645342	0.775153	1.20115	0.264417
High	Master Protein	P19623	Spermidine synthase OS=Homo sapiens OX=9606 GN=SRM PE=1 SV=1	15	4	33.8	122	94	0.684624	0.822397	1.20124	0.264523
High	Master Protein	P61956	Small ubiquitin-related modifier 2 OS=Homo sapiens OX=9606 GN=SUMO2 PE=1 SV=3	23	2	10.9	192.6	148.4	1.08081	1.29834	1.20127	0.264555
High	Master Protein	P50995	Annexin A11 OS=Homo sapiens OX=9606 GN=ANXA11 PE=1 SV=1	19	10	54.4	482	371.5	2.70483	3.25022	1.20164	0.265001
High	Master Protein	Q14204	Cytoplasmic dynein 1 heavy chain 1 OS=Homo sapiens OX=9606 GN=DYNC1H1 PE=1 SV=5	28	118	532.1	6743.1	5199	37.8401	45.4856	1.20205	0.265494
High	Master Protein	O43143	Pre-mRNA-splicing factor ATP-dependent RNA helicase DHX15 OS=Homo sapiens OX=9606 GN=DHX15 PE=1 SV=2	18	14	90.9	784.1	604.8	4.40011	5.29134	1.20255	0.266092
High	Master Protein	P08962	CD63 antigen OS=Homo sapiens OX=9606 GN=CD63 PE=1 SV=2	8	4	25.6	151	116.5	0.847363	1.01925	1.20285	0.266453
High	Master Protein	Q15365	Poly(rC)-binding protein 1 OS=Homo sapiens OX=9606 GN=PCBP1 PE=1 SV=2	40	13	37.5	847	653.5	4.75309	5.71741	1.20288	0.266497
High	Master Protein	P39023	60S ribosomal protein L3 OS=Homo sapiens OX=9606 GN=RPL3 PE=1 SV=2	29	14	46.1	1100.4	849.1	6.17508	7.4287	1.20301	0.26665
High	Master Protein	Q96EP5	DAZ-associated protein 1 OS=Homo sapiens OX=9606 GN=DAZAP1 PE=1 SV=1	13	4	43.4	105.1	81.1	0.589787	0.709536	1.20304	0.266683
High	Master Protein	O75306	NADH dehydrogenase [ubiquinone] iron-sulfur protein 2, mitochondrial OS=Homo sapiens OX=9606 GN=NDUFS2 PE=1 SV=2	6	3	52.5	286.6	221.2	1.60831	1.93526	1.20329	0.266985
High	Master Protein	O15511	Actin-related protein 2/3 complex subunit 5 OS=Homo sapiens OX=9606 GN=ARPC5 PE=1 SV=3	25	3	16.3	44.7	34.5	0.250842	0.301837	1.2033	0.266993
High	Master Protein	O00154	Cytosolic acyl coenzyme A thioester hydrolase OS=Homo sapiens OX=9606 GN=ACOT7 PE=1 SV=3	17	6	41.8	290.7	224.4	1.63131	1.96325	1.20348	0.267214
High	Master Protein	P05198	Eukaryotic translation initiation factor 2 subunit 1 OS=Homo sapiens OX=9606 GN=EIF2S1 PE=1 SV=3	43	14	36.1	686.1	530.1	3.85017	4.6378	1.20457	0.268518
High	Master Protein	J3QRS3	Myosin regulatory light chain 12A OS=Homo sapiens OX=9606 GN=MYL12A PE=1 SV=1	55	8	20.4	409.4	316.5	2.29742	2.76903	1.20528	0.269366
High	Master Protein	Q12907	Vesicular integral-membrane protein VIP36 OS=Homo sapiens OX=9606 GN=LMAN2 PE=1 SV=1	22	6	40.2	409.9	316.9	2.30022	2.77253	1.20533	0.269428
High	Master Protein	Q99614	Tetratricopeptide repeat protein 1 OS=Homo sapiens OX=9606 GN=TTC1 PE=1 SV=1	14	3	33.5	234.3	181.2	1.31481	1.5853	1.20572	0.269898
High	Master Protein	Q9Y333	U6 snRNA-associated Sm-like protein LSm2 OS=Homo sapiens OX=9606 GN=LSM2 PE=1 SV=1	32	3	10.8	94.9	73.4	0.532548	0.64217	1.20584	0.270044
High	Master Protein	P51572	B-cell receptor-associated protein 31 OS=Homo sapiens OX=9606 GN=BCAP31 PE=1 SV=3	31	8	28	838.4	648.6	4.70483	5.67454	1.20611	0.270362
High	Master Protein	Q5RKV6	Exosome complex component MTR3 OS=Homo sapiens OX=9606 GN=EXOSC6 PE=1 SV=1	15	2	28.2	51.7	40	0.290123	0.349956	1.20623	0.270508
High	Master Protein	L7N2F9	Uncharacterized protein (Fragment) OS=Homo sapiens OX=9606 PE=4 SV=1	20	3	13.1	120.2	93	0.674523	0.813648	1.20626	0.270538
High	Master Protein	Q9NTZ6	RNA-binding protein 12 OS=Homo sapiens OX=9606 GN=RBM12 PE=1 SV=1	5	5	97.3	861.3	666.8	4.83333	5.83377	1.20699	0.27141
High	Master Protein	P05388	60S acidic ribosomal protein P0 OS=Homo sapiens OX=9606 GN=RPLP0 PE=1 SV=1	40	12	34.3	599.2	463.9	3.36251	4.05862	1.20702	0.271448
High	Master Protein	P62244	40S ribosomal protein S15a OS=Homo sapiens OX=9606 GN=RPS15A PE=1 SV=2	52	8	14.8	573.8	444.3	3.21998	3.88714	1.20719	0.271658
High	Master Protein	P46777	60S ribosomal protein L5 OS=Homo sapiens OX=9606 GN=RPL5 PE=1 SV=3	27	11	34.3	726.5	562.8	4.07688	4.92388	1.20776	0.272331
High	Master Protein	P46087	Probable 28S rRNA (cytosine(4447)-C(5))-methyltransferase OS=Homo sapiens OX=9606 GN=NOP2 PE=1 SV=2	4	2	89.2	61.7	47.8	0.34624	0.418198	1.20783	0.272412
High	Master Protein	Q9Y295	Developmentally-regulated GTP-binding protein 1 OS=Homo sapiens OX=9606 GN=DRG1 PE=1 SV=1	14	4	40.5	70.6	54.7	0.396184	0.478565	1.20794	0.272545
High	Master Protein	G8JLH6	Tetraspanin (Fragment) OS=Homo sapiens OX=9606 GN=CD9 PE=1 SV=1	6	2	25.4	103.5	80.2	0.580808	0.701662	1.20808	0.272715
High	Master Protein	O75964	ATP synthase subunit g, mitochondrial OS=Homo sapiens OX=9606 GN=ATP5L PE=1 SV=3	25	3	11.4	123.5	95.7	0.693042	0.83727	1.20811	0.272752
High	Master Protein	P09543	2',3'-cyclic-nucleotide 3'-phosphodiesterase OS=Homo sapiens OX=9606 GN=CNP PE=1 SV=2	19	8	47.5	517.4	401	2.90348	3.50831	1.20831	0.272994
High	Master Protein	Q01813	ATP-dependent 6-phosphofructokinase, platelet type OS=Homo sapiens OX=9606 GN=PFKP PE=1 SV=2	37	25	85.5	886.2	687	4.97306	6.0105	1.20861	0.27335
High	Master Protein	O95433	Activator of 90 kDa heat shock protein ATPase homolog 1 OS=Homo sapiens OX=9606 GN=AHSA1 PE=1 SV=1	35	10	38.3	345.8	268.1	1.94052	2.34558	1.20874	0.273505
High	Master Protein	Q13131	5'-AMP-activated protein kinase catalytic subunit alpha-1 OS=Homo sapiens OX=9606 GN=PRKAA1 PE=1 SV=4	5	2	64	44.2	34.3	0.248036	0.300087	1.20985	0.274834
High	Master Protein	P09496	Clathrin light chain A OS=Homo sapiens OX=9606 GN=CLTA PE=1 SV=1	16	5	27.1	386.3	299.8	2.16779	2.62292	1.20995	0.274951
High	Master Protein	Q969V3	Nicalin OS=Homo sapiens OX=9606 GN=NCLN PE=1 SV=2	9	5	62.9	267.2	207.4	1.49944	1.81452	1.21013	0.275168
High	Master Protein	Q8WWM7	Ataxin-2-like protein OS=Homo sapiens OX=9606 GN=ATXN2L PE=1 SV=2	11	10	113.3	315.1	244.6	1.76824	2.13998	1.21023	0.275287
High	Master Protein	J3QQ67	60S ribosomal protein L18 (Fragment) OS=Homo sapiens OX=9606 GN=RPL18 PE=1 SV=1	31	5	21.8	205.7	159.7	1.15432	1.3972	1.21041	0.275494
High	Master Protein	Q92621	Nuclear pore complex protein Nup205 OS=Homo sapiens OX=9606 GN=NUP205 PE=1 SV=3	3	5	227.8	260	201.9	1.45903	1.7664	1.21067	0.275801
High	Master Protein	P50502	Hsc70-interacting protein OS=Homo sapiens OX=9606 GN=ST13 PE=1 SV=2	20	6	41.3	454.5	353.1	2.55051	3.08924	1.21123	0.276468
High	Master Protein	P52888	Thimet oligopeptidase OS=Homo sapiens OX=9606 GN=THOP1 PE=1 SV=2	7	4	78.8	225.2	175	1.26375	1.53106	1.21152	0.27682
High	Master Protein	Q9NQP4	Prefoldin subunit 4 OS=Homo sapiens OX=9606 GN=PFDN4 PE=1 SV=1	13	2	15.3	168.7	131.1	0.946689	1.14698	1.21157	0.27688
High	Master Protein	P20962	Parathymosin OS=Homo sapiens OX=9606 GN=PTMS PE=1 SV=2	23	2	11.5	164.3	127.7	0.921998	1.11724	1.21175	0.277098
High	Master Protein	O60925	Prefoldin subunit 1 OS=Homo sapiens OX=9606 GN=PFDN1 PE=1 SV=2	18	3	14.2	150.4	116.9	0.843996	1.02275	1.21179	0.277142
High	Master Protein	Q5T9B7	Adenylate kinase isoenzyme 1 OS=Homo sapiens OX=9606 GN=AK1 PE=1 SV=1	20	4	23.4	166.6	129.5	0.934905	1.13298	1.21187	0.277236
High	Master Protein	P17931	Galectin-3 OS=Homo sapiens OX=9606 GN=LGALS3 PE=1 SV=5	34	8	26.1	690.1	536.5	3.87262	4.69379	1.21205	0.277445
High	Master Protein	A0A0A6YYL6	Protein RPL17-C18orf32 OS=Homo sapiens OX=9606 GN=RPL17-C18orf32 PE=3 SV=1	29	6	26.4	1119.2	870.2	6.28058	7.6133	1.2122	0.277623
High	Master Protein	P49189	4-trimethylaminobutyraldehyde dehydrogenase OS=Homo sapiens OX=9606 GN=ALDH9A1 PE=1 SV=3	17	7	53.8	392.2	305	2.2009	2.66842	1.21242	0.277892
High	Master Protein	Q96PU8	Protein quaking OS=Homo sapiens OX=9606 GN=QKI PE=1 SV=1	12	3	37.6	142.7	111	0.800786	0.971129	1.21272	0.278246
High	Master Protein	Q15393	Splicing factor 3B subunit 3 OS=Homo sapiens OX=9606 GN=SF3B3 PE=1 SV=4	10	11	135.5	880.1	684.6	4.93883	5.9895	1.21274	0.278266
High	Master Protein	P05091	Aldehyde dehydrogenase, mitochondrial OS=Homo sapiens OX=9606 GN=ALDH2 PE=1 SV=2	12	5	56.3	103.7	80.7	0.58193	0.706037	1.21327	0.278897
High	Master Protein	Q9BRL6	Serine/arginine-rich splicing factor 8 OS=Homo sapiens OX=9606 GN=SRSF8 PE=1 SV=1	5	2	32.3	210.7	164	1.18238	1.43482	1.2135	0.279177
High	Master Protein	Q6IQ22	Ras-related protein Rab-12 OS=Homo sapiens OX=9606 GN=RAB12 PE=1 SV=3	16	4	27.2	53.7	41.8	0.301347	0.365704	1.21357	0.279253
High	Master Protein	O00299	Chloride intracellular channel protein 1 OS=Homo sapiens OX=9606 GN=CLIC1 PE=1 SV=4	76	15	26.9	971	756.1	5.44893	6.61505	1.21401	0.279778
High	Master Protein	P07339	Cathepsin D OS=Homo sapiens OX=9606 GN=CTSD PE=1 SV=1	44	19	44.5	1175	915.1	6.59371	8.00612	1.21421	0.280012
High	Master Protein	P35268	60S ribosomal protein L22 OS=Homo sapiens OX=9606 GN=RPL22 PE=1 SV=2	41	3	14.8	333.4	259.8	1.87093	2.27297	1.21488	0.280819
High	Master Protein	Q14444	Caprin-1 OS=Homo sapiens OX=9606 GN=CAPRIN1 PE=1 SV=2	11	8	78.3	421	328.1	2.36251	2.87052	1.21503	0.280987
High	Master Protein	P16403	Histone H1.2 OS=Homo sapiens OX=9606 GN=HIST1H1C PE=1 SV=2	32	9	21.4	839.7	654.6	4.71212	5.72703	1.21538	0.281412
High	Master Protein	Q12959	Disks large homolog 1 OS=Homo sapiens OX=9606 GN=DLG1 PE=1 SV=2	8	4	100.4	42.2	32.9	0.236813	0.287839	1.21547	0.281517
High	Master Protein	P05114	Non-histone chromosomal protein HMG-14 OS=Homo sapiens OX=9606 GN=HMGN1 PE=1 SV=3	26	4	10.7	252	196.5	1.41414	1.71916	1.21569	0.281778
High	Master Protein	Q9C0C9	(E3-independent) E2 ubiquitin-conjugating enzyme OS=Homo sapiens OX=9606 GN=UBE2O PE=1 SV=3	2	2	141.2	69.1	53.9	0.387767	0.471566	1.21611	0.282271
High	Master Protein	Q14738	Serine/threonine-protein phosphatase 2A 56 kDa regulatory subunit delta isoform OS=Homo sapiens OX=9606 GN=PPP2R5D PE=1 SV=1	7	4	69.9	302.1	235.7	1.69529	2.06212	1.21638	0.282598
High	Master Protein	P08582	Melanotransferrin OS=Homo sapiens OX=9606 GN=MELTF PE=1 SV=2	5	3	80.2	22.3	17.4	0.12514	0.152231	1.21648	0.282716
High	Master Protein	P52209	6-phosphogluconate dehydrogenase, decarboxylating OS=Homo sapiens OX=9606 GN=PGD PE=1 SV=3	21	11	53.1	684.4	534.1	3.84063	4.67279	1.21667	0.282942
High	Master Protein	A0A1W2PPS1	Heterogeneous nuclear ribonucleoprotein U OS=Homo sapiens OX=9606 GN=HNRNPU PE=1 SV=1	32	27	88.3	2909.5	2271.1	16.3272	19.8696	1.21697	0.283292
High	Master Protein	P62805	Histone H4 OS=Homo sapiens OX=9606 GN=HIST1H4A PE=1 SV=2	55	13	11.4	1198.4	935.6	6.72503	8.18548	1.21717	0.283526
High	Master Protein	Q9BUF5	Tubulin beta-6 chain OS=Homo sapiens OX=9606 GN=TUBB6 PE=1 SV=1	30	18	49.8	291.4	227.6	1.63524	1.99125	1.21771	0.284172
High	Master Protein	P08648	Integrin alpha-5 OS=Homo sapiens OX=9606 GN=ITGA5 PE=1 SV=2	4	4	114.5	265.9	207.7	1.49214	1.81715	1.21781	0.284289
High	Master Protein	P35244	Replication protein A 14 kDa subunit OS=Homo sapiens OX=9606 GN=RPA3 PE=1 SV=1	23	3	13.6	142.6	111.4	0.800224	0.974628	1.21794	0.284447
High	Master Protein	P62701	40S ribosomal protein S4, X isoform OS=Homo sapiens OX=9606 GN=RPS4X PE=1 SV=2	40	14	29.6	1307.1	1021.2	7.33502	8.93438	1.21805	0.284568
High	Master Protein	Q9Y3L5	Ras-related protein Rap-2c OS=Homo sapiens OX=9606 GN=RAP2C PE=1 SV=1	11	2	20.7	56.3	44	0.315937	0.384952	1.21844	0.285041
High	Master Protein	P14174	Macrophage migration inhibitory factor OS=Homo sapiens OX=9606 GN=MIF PE=1 SV=4	14	2	12.5	126.4	98.8	0.709315	0.864392	1.21863	0.285258
High	Master Protein	P05120	Plasminogen activator inhibitor 2 OS=Homo sapiens OX=9606 GN=SERPINB2 PE=1 SV=2	19	7	46.6	262	204.8	1.47026	1.79178	1.21868	0.285321
High	Master Protein	Q9Y263	Phospholipase A-2-activating protein OS=Homo sapiens OX=9606 GN=PLAA PE=1 SV=2	2	2	87.1	21.1	16.5	0.118406	0.144357	1.21917	0.285895
High	Master Protein	P55884	Eukaryotic translation initiation factor 3 subunit B OS=Homo sapiens OX=9606 GN=EIF3B PE=1 SV=3	16	11	92.4	751.3	587.6	4.21605	5.14086	1.21935	0.286117
High	Master Protein	Q15370	Elongin-B OS=Homo sapiens OX=9606 GN=ELOB PE=1 SV=1	52	5	13.1	313.6	245.3	1.75982	2.14611	1.2195	0.286294
High	Master Protein	P62829	60S ribosomal protein L23 OS=Homo sapiens OX=9606 GN=RPL23 PE=1 SV=1	44	6	14.9	312	244.1	1.75084	2.13561	1.21976	0.286598
High	Master Protein	Q14258	E3 ubiquitin/ISG15 ligase TRIM25 OS=Homo sapiens OX=9606 GN=TRIM25 PE=1 SV=2	13	7	70.9	324.3	253.8	1.81987	2.22047	1.22013	0.287035
High	Master Protein	P20645	Cation-dependent mannose-6-phosphate receptor OS=Homo sapiens OX=9606 GN=M6PR PE=1 SV=1	9	2	31	85.6	67	0.480359	0.586177	1.22029	0.287222
High	Master Protein	P35270	Sepiapterin reductase OS=Homo sapiens OX=9606 GN=SPR PE=1 SV=1	21	4	28	144.6	113.2	0.811448	0.990376	1.22051	0.287478
High	Master Protein	P16989	Y-box-binding protein 3 OS=Homo sapiens OX=9606 GN=YBX3 PE=1 SV=4	10	2	40.1	22.6	17.7	0.126824	0.154856	1.22103	0.288099
High	Master Protein	P04406	Glyceraldehyde-3-phosphate dehydrogenase OS=Homo sapiens OX=9606 GN=GAPDH PE=1 SV=3	57	35	36	3578.1	2802.4	20.0791	24.5179	1.22107	0.288141
High	Master Protein	P06493	Cyclin-dependent kinase 1 OS=Homo sapiens OX=9606 GN=CDK1 PE=1 SV=3	50	13	34.1	636.7	498.9	3.57295	4.36483	1.22163	0.288809
High	Master Protein	P08758	Annexin A5 OS=Homo sapiens OX=9606 GN=ANXA5 PE=1 SV=2	70	24	35.9	2358.3	1847.9	13.234	16.1671	1.22163	0.288811
High	Master Protein	O96008	Mitochondrial import receptor subunit TOM40 homolog OS=Homo sapiens OX=9606 GN=TOMM40 PE=1 SV=1	14	4	37.9	194.6	152.7	1.09203	1.33596	1.22337	0.29086
High	Master Protein	P49903	Selenide, water dikinase 1 OS=Homo sapiens OX=9606 GN=SEPHS1 PE=1 SV=2	8	2	42.9	49.7	39	0.2789	0.341207	1.2234	0.2909
High	Master Protein	O75396	Vesicle-trafficking protein SEC22b OS=Homo sapiens OX=9606 GN=SEC22B PE=1 SV=4	30	6	24.6	277.4	217.7	1.55668	1.90464	1.22353	0.291046
High	Master Protein	P07741	Adenine phosphoribosyltransferase OS=Homo sapiens OX=9606 GN=APRT PE=1 SV=2	20	3	19.6	132.9	104.3	0.745791	0.912511	1.22355	0.29107
High	Master Protein	P08574	Cytochrome c1, heme protein, mitochondrial OS=Homo sapiens OX=9606 GN=CYC1 PE=1 SV=3	18	4	35.4	173.5	136.2	0.973625	1.1916	1.22388	0.291463
High	Master Protein	Q13423	NAD(P) transhydrogenase, mitochondrial OS=Homo sapiens OX=9606 GN=NNT PE=1 SV=3	7	7	113.8	189.8	149	1.0651	1.30359	1.22392	0.291504
High	Master Protein	Q8TDN6	Ribosome biogenesis protein BRX1 homolog OS=Homo sapiens OX=9606 GN=BRIX1 PE=1 SV=2	21	5	41.4	193.1	151.6	1.08361	1.32633	1.22399	0.291594
High	Master Protein	Q9Y2A7	Nck-associated protein 1 OS=Homo sapiens OX=9606 GN=NCKAP1 PE=1 SV=1	7	8	128.7	194.5	152.7	1.09147	1.33596	1.224	0.291602
High	Master Protein	E9PFW3	AP-2 complex subunit mu OS=Homo sapiens OX=9606 GN=AP2M1 PE=1 SV=1	16	6	52.3	180.1	141.4	1.01066	1.2371	1.22404	0.291656
High	Master Protein	Q9UQ80	Proliferation-associated protein 2G4 OS=Homo sapiens OX=9606 GN=PA2G4 PE=1 SV=3	32	11	43.8	443.3	348.1	2.48765	3.04549	1.22424	0.29189
High	Master Protein	P13984	General transcription factor IIF subunit 2 OS=Homo sapiens OX=9606 GN=GTF2F2 PE=1 SV=2	16	3	28.4	134.9	106	0.757015	0.927384	1.22505	0.292846
High	Master Protein	P38159	RNA-binding motif protein, X chromosome OS=Homo sapiens OX=9606 GN=RBMX PE=1 SV=3	29	14	42.3	804.8	632.4	4.51627	5.53281	1.22508	0.292879
High	Master Protein	O95881	Thioredoxin domain-containing protein 12 OS=Homo sapiens OX=9606 GN=TXNDC12 PE=1 SV=1	14	2	19.2	237.3	186.5	1.33165	1.63167	1.2253	0.293135
High	Master Protein	Q9H6S3	Epidermal growth factor receptor kinase substrate 8-like protein 2 OS=Homo sapiens OX=9606 GN=EPS8L2 PE=1 SV=2	8	4	80.6	87	68.4	0.488215	0.598425	1.22574	0.293653
High	Master Protein	Q02880	DNA topoisomerase 2-beta OS=Homo sapiens OX=9606 GN=TOP2B PE=1 SV=3	6	9	183.2	132.4	104.1	0.742985	0.910761	1.22581	0.293739
High	Master Protein	P12236	ADP/ATP translocase 3 OS=Homo sapiens OX=9606 GN=SLC25A6 PE=1 SV=4	48	13	32.8	1132.8	890.7	6.3569	7.79265	1.22586	0.29379
High	Master Protein	Q9UG63	ATP-binding cassette sub-family F member 2 OS=Homo sapiens OX=9606 GN=ABCF2 PE=1 SV=2	5	3	71.2	92.2	72.5	0.517396	0.634296	1.22594	0.293886
High	Master Protein	Q9BWD1	Acetyl-CoA acetyltransferase, cytosolic OS=Homo sapiens OX=9606 GN=ACAT2 PE=1 SV=2	19	6	41.3	376.6	296.2	2.11336	2.59143	1.22621	0.294211
High	Master Protein	A0A0G2JLB3	Glucosylceramidase OS=Homo sapiens OX=9606 GN=GBA PE=1 SV=1	3	2	59.6	80.6	63.4	0.452301	0.554681	1.22635	0.294375
High	Master Protein	P09669	Cytochrome c oxidase subunit 6C OS=Homo sapiens OX=9606 GN=COX6C PE=1 SV=2	20	2	8.8	152.5	120	0.85578	1.04987	1.2268	0.294897
High	Master Protein	P49207	60S ribosomal protein L34 OS=Homo sapiens OX=9606 GN=RPL34 PE=1 SV=3	35	6	13.3	518.8	408.3	2.91134	3.57218	1.22699	0.295123
High	Master Protein	Q16186	Proteasomal ubiquitin receptor ADRM1 OS=Homo sapiens OX=9606 GN=ADRM1 PE=1 SV=2	13	4	42.1	130.2	102.5	0.73064	0.896763	1.22737	0.295566
High	Master Protein	Q15003	Condensin complex subunit 2 OS=Homo sapiens OX=9606 GN=NCAPH PE=1 SV=3	6	3	82.5	22.6	17.8	0.126824	0.155731	1.22793	0.296226
High	Master Protein	P31930	Cytochrome b-c1 complex subunit 1, mitochondrial OS=Homo sapiens OX=9606 GN=UQCRC1 PE=1 SV=3	20	7	52.6	256.2	201.8	1.43771	1.76553	1.22801	0.296328
High	Master Protein	P55735	Protein SEC13 homolog OS=Homo sapiens OX=9606 GN=SEC13 PE=1 SV=3	18	4	35.5	126.7	99.8	0.710999	0.873141	1.22805	0.296367
High	Master Protein	P62318	Small nuclear ribonucleoprotein Sm D3 OS=Homo sapiens OX=9606 GN=SNRPD3 PE=1 SV=1	32	4	13.9	144.6	113.9	0.811448	0.9965	1.22805	0.296372
High	Master Protein	O95104	Splicing factor, arginine/serine-rich 15 OS=Homo sapiens OX=9606 GN=SCAF4 PE=1 SV=3	2	3	125.8	72.6	57.2	0.407407	0.500437	1.22835	0.296718
High	Master Protein	Q2NKX8	DNA excision repair protein ERCC-6-like OS=Homo sapiens OX=9606 GN=ERCC6L PE=1 SV=1	1	2	141	60.9	48	0.341751	0.419948	1.22881	0.297264
High	Master Protein	P35269	General transcription factor IIF subunit 1 OS=Homo sapiens OX=9606 GN=GTF2F1 PE=1 SV=2	7	3	58.2	47.7	37.6	0.267677	0.328959	1.22894	0.297415
High	Master Protein	Q9NY12	H/ACA ribonucleoprotein complex subunit 1 OS=Homo sapiens OX=9606 GN=GAR1 PE=1 SV=1	8	2	22.3	182	143.5	1.02132	1.25547	1.22925	0.297784
High	Master Protein	H0YKD8	60S ribosomal protein L28 OS=Homo sapiens OX=9606 GN=RPL28 PE=1 SV=1	22	4	19.1	411.5	324.5	2.3092	2.83902	1.22944	0.297998
High	Master Protein	Q1KMD3	Heterogeneous nuclear ribonucleoprotein U-like protein 2 OS=Homo sapiens OX=9606 GN=HNRNPUL2 PE=1 SV=1	20	12	85.1	306.1	241.4	1.71773	2.11199	1.22952	0.298095
High	Master Protein	B0QY89	Eukaryotic translation initiation factor 3 subunit L OS=Homo sapiens OX=9606 GN=EIF3L PE=1 SV=1	26	14	70.9	753.7	594.4	4.22952	5.20035	1.22954	0.298116
High	Master Protein	I3L0A0	HCG2044781 OS=Homo sapiens OX=9606 GN=TMEM189-UBE2V1 PE=3 SV=1	7	3	42.2	274.9	216.9	1.54265	1.89764	1.23012	0.298795
High	Master Protein	Q9NZL9	Methionine adenosyltransferase 2 subunit beta OS=Homo sapiens OX=9606 GN=MAT2B PE=1 SV=1	15	4	37.5	68.4	54	0.383838	0.472441	1.23083	0.299635
High	Master Protein	Q6P2E9	Enhancer of mRNA-decapping protein 4 OS=Homo sapiens OX=9606 GN=EDC4 PE=1 SV=1	2	2	151.6	157.7	124.5	0.884961	1.08924	1.23083	0.299635
High	Master Protein	Q13247	Serine/arginine-rich splicing factor 6 OS=Homo sapiens OX=9606 GN=SRSF6 PE=1 SV=2	16	6	39.6	279.1	220.4	1.56622	1.92826	1.23116	0.300014
High	Master Protein	Q99436	Proteasome subunit beta type-7 OS=Homo sapiens OX=9606 GN=PSMB7 PE=1 SV=1	18	4	29.9	153.3	121.1	0.860269	1.05949	1.23158	0.300513
High	Master Protein	O60256	Phosphoribosyl pyrophosphate synthase-associated protein 2 OS=Homo sapiens OX=9606 GN=PRPSAP2 PE=1 SV=1	15	4	40.9	161.4	127.5	0.905724	1.11549	1.2316	0.300529
High	Master Protein	P84090	Enhancer of rudimentary homolog OS=Homo sapiens OX=9606 GN=ERH PE=1 SV=1	34	4	12.3	120	94.8	0.673401	0.829396	1.23165	0.300596
High	Master Protein	A0AVT1	Ubiquitin-like modifier-activating enzyme 6 OS=Homo sapiens OX=9606 GN=UBA6 PE=1 SV=1	7	7	117.9	1057.3	835.3	5.93322	7.30796	1.2317	0.300653
High	Master Protein	Q5BJF2	Sigma intracellular receptor 2 OS=Homo sapiens OX=9606 GN=TMEM97 PE=1 SV=1	13	2	20.8	62.4	49.3	0.350168	0.431321	1.23175	0.300714
High	Master Protein	B7ZM99	MTHFD1L protein OS=Homo sapiens OX=9606 GN=MTHFD1L PE=1 SV=1	9	8	105.8	192.6	152.3	1.08081	1.33246	1.23284	0.30198
High	Master Protein	Q92598	Heat shock protein 105 kDa OS=Homo sapiens OX=9606 GN=HSPH1 PE=1 SV=1	31	22	96.8	1061.6	839.9	5.95735	7.34821	1.23347	0.302721
High	Master Protein	Q9H3P7	Golgi resident protein GCP60 OS=Homo sapiens OX=9606 GN=ACBD3 PE=1 SV=4	7	3	60.6	49.8	39.4	0.279461	0.344707	1.23347	0.302722
High	Master Protein	Q9BPX3	Condensin complex subunit 3 OS=Homo sapiens OX=9606 GN=NCAPG PE=1 SV=1	6	6	114.3	276.8	219.2	1.55331	1.91776	1.23463	0.304076
High	Master Protein	O75131	Copine-3 OS=Homo sapiens OX=9606 GN=CPNE3 PE=1 SV=1	17	8	60.1	374.7	296.8	2.10269	2.59668	1.23493	0.304427
High	Master Protein	A0A0A0MSG2	Four and a half LIM domains protein 2 OS=Homo sapiens OX=9606 GN=FHL2 PE=1 SV=1	10	4	44.8	71.8	56.9	0.402918	0.497813	1.23552	0.305117
High	Master Protein	Q16401	26S proteasome non-ATPase regulatory subunit 5 OS=Homo sapiens OX=9606 GN=PSMD5 PE=1 SV=3	10	4	56.2	146.7	116.3	0.823232	1.0175	1.23598	0.305654
High	Master Protein	P17812	CTP synthase 1 OS=Homo sapiens OX=9606 GN=CTPS1 PE=1 SV=2	13	7	66.6	318.5	252.5	1.78732	2.2091	1.23599	0.305662
High	Master Protein	P55072	Transitional endoplasmic reticulum ATPase OS=Homo sapiens OX=9606 GN=VCP PE=1 SV=4	56	36	89.3	1880.2	1490.9	10.5511	13.0437	1.23625	0.305969
High	Master Protein	E9PHI4	SUN domain-containing protein 1 OS=Homo sapiens OX=9606 GN=SUN1 PE=1 SV=1	12	7	91.1	166.3	131.9	0.933221	1.15398	1.23656	0.306328
High	Master Protein	Q9Y3B2	Exosome complex component CSL4 OS=Homo sapiens OX=9606 GN=EXOSC1 PE=1 SV=1	14	2	21.4	93.6	74.3	0.525253	0.650044	1.23758	0.307526
High	Master Protein	Q7L2E3	Putative ATP-dependent RNA helicase DHX30 OS=Homo sapiens OX=9606 GN=DHX30 PE=1 SV=1	4	4	133.9	363.3	288.6	2.03872	2.52493	1.23849	0.308582
High	Master Protein	P32969	60S ribosomal protein L9 OS=Homo sapiens OX=9606 GN=RPL9 PE=1 SV=1	25	5	21.9	457.9	363.8	2.56958	3.18285	1.23866	0.308785
High	Master Protein	P25205	DNA replication licensing factor MCM3 OS=Homo sapiens OX=9606 GN=MCM3 PE=1 SV=3	13	10	90.9	278.9	221.6	1.5651	1.93876	1.23875	0.308882
High	Master Protein	Q9ULT8	E3 ubiquitin-protein ligase HECTD1 OS=Homo sapiens OX=9606 GN=HECTD1 PE=1 SV=3	1	2	289.2	15.1	12	0.0847363	0.104987	1.23898	0.309158
High	Master Protein	Q6DD88	Atlastin-3 OS=Homo sapiens OX=9606 GN=ATL3 PE=1 SV=1	22	10	60.5	869.7	691.3	4.88047	6.04812	1.23925	0.309466
High	Master Protein	Q86Y56	Dynein assembly factor 5, axonemal OS=Homo sapiens OX=9606 GN=DNAAF5 PE=1 SV=4	1	2	93.5	71.8	57.1	0.402918	0.499563	1.23986	0.310179
High	Master Protein	O00764	Pyridoxal kinase OS=Homo sapiens OX=9606 GN=PDXK PE=1 SV=1	9	2	35.1	38.2	30.4	0.214366	0.265967	1.24071	0.311171
High	Master Protein	Q9HAV4	Exportin-5 OS=Homo sapiens OX=9606 GN=XPO5 PE=1 SV=1	3	3	136.2	202.1	160.9	1.13412	1.4077	1.24123	0.311767
High	Master Protein	Q9UH65	Switch-associated protein 70 OS=Homo sapiens OX=9606 GN=SWAP70 PE=1 SV=1	10	7	69	222.4	177.1	1.24804	1.54943	1.2415	0.312079
High	Master Protein	Q9UNF1	Melanoma-associated antigen D2 OS=Homo sapiens OX=9606 GN=MAGED2 PE=1 SV=2	22	13	64.9	450.9	359.1	2.5303	3.14173	1.24164	0.31225
High	Master Protein	Q92734	Protein TFG OS=Homo sapiens OX=9606 GN=TFG PE=1 SV=2	29	6	43.4	124.3	99	0.697531	0.866142	1.24173	0.312346
High	Master Protein	Q9H0D6	5'-3' exoribonuclease 2 OS=Homo sapiens OX=9606 GN=XRN2 PE=1 SV=1	15	13	108.5	431.5	343.7	2.42144	3.007	1.24182	0.312461
High	Master Protein	Q96I99	Succinate--CoA ligase [GDP-forming] subunit beta, mitochondrial OS=Homo sapiens OX=9606 GN=SUCLG2 PE=1 SV=2	21	9	46.5	297	236.7	1.66667	2.07087	1.24252	0.313269
High	Master Protein	P16152	Carbonyl reductase [NADPH] 1 OS=Homo sapiens OX=9606 GN=CBR1 PE=1 SV=3	45	9	30.4	351.4	280.1	1.97194	2.45057	1.24272	0.3135
High	Master Protein	P20042	Eukaryotic translation initiation factor 2 subunit 2 OS=Homo sapiens OX=9606 GN=EIF2S2 PE=1 SV=2	30	7	38.4	420.1	334.9	2.35746	2.93001	1.24286	0.31367
High	Master Protein	Q2NL82	Pre-rRNA-processing protein TSR1 homolog OS=Homo sapiens OX=9606 GN=TSR1 PE=1 SV=1	4	3	91.8	99.9	79.7	0.560606	0.697288	1.24381	0.314767
High	Master Protein	Q9Y266	Nuclear migration protein nudC OS=Homo sapiens OX=9606 GN=NUDC PE=1 SV=1	29	10	38.2	645	514.7	3.61953	4.50306	1.2441	0.315105
High	Master Protein	P62753	40S ribosomal protein S6 OS=Homo sapiens OX=9606 GN=RPS6 PE=1 SV=1	26	6	28.7	627.9	501.1	3.52357	4.38408	1.24421	0.315236
High	Master Protein	P06748	Nucleophosmin OS=Homo sapiens OX=9606 GN=NPM1 PE=1 SV=2	63	18	32.6	1033.7	825.1	5.80079	7.21872	1.24444	0.315495
High	Master Protein	Q9H4A4	Aminopeptidase B OS=Homo sapiens OX=9606 GN=RNPEP PE=1 SV=2	20	11	72.5	379.8	303.2	2.13131	2.65267	1.24462	0.315702
High	Master Protein	P53597	Succinate--CoA ligase [ADP/GDP-forming] subunit alpha, mitochondrial OS=Homo sapiens OX=9606 GN=SUCLG1 PE=1 SV=4	12	3	36.2	109.1	87.1	0.612233	0.76203	1.24467	0.315765
High	Master Protein	P51114	Fragile X mental retardation syndrome-related protein 1 OS=Homo sapiens OX=9606 GN=FXR1 PE=1 SV=3	12	7	69.7	364.2	290.8	2.04377	2.54418	1.24485	0.315968
High	Master Protein	O95394	Phosphoacetylglucosamine mutase OS=Homo sapiens OX=9606 GN=PGM3 PE=1 SV=1	17	10	59.8	361.3	288.5	2.0275	2.52406	1.24491	0.316046
High	Master Protein	P34932	Heat shock 70 kDa protein 4 OS=Homo sapiens OX=9606 GN=HSPA4 PE=1 SV=4	44	31	94.3	1434.3	1145.4	8.04882	10.021	1.24503	0.316177
High	Master Protein	P62081	40S ribosomal protein S7 OS=Homo sapiens OX=9606 GN=RPS7 PE=1 SV=1	29	6	22.1	470.9	376.1	2.64254	3.29046	1.24519	0.316368
High	Master Protein	X6RAL5	Histone deacetylase complex subunit SAP18 OS=Homo sapiens OX=9606 GN=SAP18 PE=1 SV=1	12	2	19.5	192.2	153.6	1.07856	1.34383	1.24595	0.317242
High	Master Protein	A0A0G2JK23	Large proline-rich protein BAG6 OS=Homo sapiens OX=9606 GN=BAG6 PE=1 SV=1	8	7	119.3	199.8	159.7	1.12121	1.3972	1.24615	0.31748
High	Master Protein	A8MWD9	Putative small nuclear ribonucleoprotein G-like protein 15 OS=Homo sapiens OX=9606 GN=SNRPGP15 PE=5 SV=2	25	2	8.5	180.4	144.2	1.01235	1.26159	1.24621	0.317544
High	Master Protein	Q3ZCQ8	Mitochondrial import inner membrane translocase subunit TIM50 OS=Homo sapiens OX=9606 GN=TIMM50 PE=1 SV=2	18	4	39.6	162.5	129.9	0.911897	1.13648	1.24628	0.317634
High	Master Protein	Q01844	RNA-binding protein EWS OS=Homo sapiens OX=9606 GN=EWSR1 PE=1 SV=1	4	3	68.4	289.8	231.7	1.62626	2.02712	1.24649	0.317872
High	Master Protein	P14324	Farnesyl pyrophosphate synthase OS=Homo sapiens OX=9606 GN=FDPS PE=1 SV=4	14	8	48.2	297.9	238.2	1.67172	2.08399	1.24662	0.318017
High	Master Protein	P29218	Inositol monophosphatase 1 OS=Homo sapiens OX=9606 GN=IMPA1 PE=1 SV=1	12	3	30.2	120.8	96.6	0.67789	0.845144	1.24673	0.318147
High	Master Protein	F8W727	60S ribosomal protein L32 OS=Homo sapiens OX=9606 GN=RPL32 PE=1 SV=1	25	5	18	768.1	614.4	4.31033	5.37533	1.24708	0.318556
High	Master Protein	O95573	Long-chain-fatty-acid--CoA ligase 3 OS=Homo sapiens OX=9606 GN=ACSL3 PE=1 SV=3	17	11	80.4	780.6	624.7	4.38047	5.46544	1.24768	0.319252
High	Master Protein	Q9NTI5	Sister chromatid cohesion protein PDS5 homolog B OS=Homo sapiens OX=9606 GN=PDS5B PE=1 SV=1	3	5	164.6	23.6	18.9	0.132435	0.165354	1.24857	0.320271
High	Master Protein	Q9UBF2	Coatomer subunit gamma-2 OS=Homo sapiens OX=9606 GN=COPG2 PE=1 SV=1	11	9	97.6	138.6	111	0.777778	0.971129	1.24859	0.320304
High	Master Protein	P43246	DNA mismatch repair protein Msh2 OS=Homo sapiens OX=9606 GN=MSH2 PE=1 SV=1	11	9	104.7	276.2	221.2	1.54994	1.93526	1.2486	0.32031
High	Master Protein	Q92616	eIF-2-alpha kinase activator GCN1 OS=Homo sapiens OX=9606 GN=GCN1 PE=1 SV=6	13	28	292.6	586.6	469.8	3.29181	4.11024	1.24863	0.320342
High	Master Protein	P48735	Isocitrate dehydrogenase [NADP], mitochondrial OS=Homo sapiens OX=9606 GN=IDH2 PE=1 SV=2	11	5	50.9	238.6	191.1	1.33895	1.67192	1.24868	0.320406
High	Master Protein	Q15149	Plectin OS=Homo sapiens OX=9606 GN=PLEC PE=1 SV=3	48	231	531.5	12752.1	10214.6	71.5606	89.3666	1.24882	0.32057
High	Master Protein	P45880	Voltage-dependent anion-selective channel protein 2 OS=Homo sapiens OX=9606 GN=VDAC2 PE=1 SV=2	53	13	31.5	710.2	569	3.98541	4.97813	1.24909	0.320875
High	Master Protein	Q14696	LRP chaperone MESD OS=Homo sapiens OX=9606 GN=MESD PE=1 SV=2	7	3	26.1	163.5	131	0.917508	1.14611	1.24915	0.320948
High	Master Protein	Q32Q12	Nucleoside diphosphate kinase OS=Homo sapiens OX=9606 GN=NME1-NME2 PE=1 SV=1	48	9	32.6	757.9	607.3	4.25309	5.31321	1.24926	0.321074
High	Master Protein	P11388	DNA topoisomerase 2-alpha OS=Homo sapiens OX=9606 GN=TOP2A PE=1 SV=3	14	22	174.3	1079	864.9	6.05499	7.56693	1.2497	0.321582
High	Master Protein	P36957	Dihydrolipoyllysine-residue succinyltransferase component of 2-oxoglutarate dehydrogenase complex, mitochondrial OS=Homo sapiens OX=9606 GN=DLST PE=1 SV=4	13	5	48.7	221.8	177.8	1.24467	1.55556	1.24977	0.321668
High	Master Protein	P09960	Leukotriene A-4 hydrolase OS=Homo sapiens OX=9606 GN=LTA4H PE=1 SV=2	22	12	69.2	630.3	505.3	3.53704	4.42082	1.24987	0.321773
High	Master Protein	P13489	Ribonuclease inhibitor OS=Homo sapiens OX=9606 GN=RNH1 PE=1 SV=2	24	10	49.9	634	508.3	3.5578	4.44707	1.24995	0.321869
High	Master Protein	Q15233	Non-POU domain-containing octamer-binding protein OS=Homo sapiens OX=9606 GN=NONO PE=1 SV=4	41	27	54.2	1458.1	1169.1	8.18238	10.2283	1.25005	0.321981
High	Master Protein	H7BY58	Protein-L-isoaspartate O-methyltransferase OS=Homo sapiens OX=9606 GN=PCMT1 PE=1 SV=1	28	5	30.3	278	222.9	1.56004	1.95013	1.25005	0.321984
High	Master Protein	Q01085	Nucleolysin TIAR OS=Homo sapiens OX=9606 GN=TIAL1 PE=1 SV=1	7	2	41.6	52	41.7	0.291807	0.364829	1.25024	0.322208
High	Master Protein	P07900	Heat shock protein HSP 90-alpha OS=Homo sapiens OX=9606 GN=HSP90AA1 PE=1 SV=5	53	61	84.6	2562.9	2055.8	14.3822	17.986	1.25058	0.322595
High	Master Protein	A0A087WZT3	BolA-like protein 2 OS=Homo sapiens OX=9606 GN=BOLA2 PE=1 SV=2	34	4	16.9	284.2	228	1.59484	1.99475	1.25075	0.322799
High	Master Protein	Q8TCT9	Minor histocompatibility antigen H13 OS=Homo sapiens OX=9606 GN=HM13 PE=1 SV=1	23	10	41.5	352.3	282.7	1.97699	2.47332	1.25105	0.323139
High	Master Protein	Q9H0B6	Kinesin light chain 2 OS=Homo sapiens OX=9606 GN=KLC2 PE=1 SV=1	16	7	68.9	85.1	68.3	0.477553	0.59755	1.25127	0.323398
High	Master Protein	O43795	Unconventional myosin-Ib OS=Homo sapiens OX=9606 GN=MYO1B PE=1 SV=3	7	7	131.9	218.9	175.7	1.2284	1.53718	1.25137	0.323514
High	Master Protein	Q9NYU2	UDP-glucose:glycoprotein glucosyltransferase 1 OS=Homo sapiens OX=9606 GN=UGGT1 PE=1 SV=3	3	4	177.1	29.4	23.6	0.164983	0.206474	1.25149	0.323643
High	Master Protein	A0A024R4E5	High density lipoprotein binding protein (Vigilin), isoform CRA_a OS=Homo sapiens OX=9606 GN=HDLBP PE=1 SV=1	16	17	141.4	617.7	495.9	3.46633	4.33858	1.25164	0.323815
High	Master Protein	Q14103	Heterogeneous nuclear ribonucleoprotein D0 OS=Homo sapiens OX=9606 GN=HNRNPD PE=1 SV=1	24	10	38.4	484.4	388.9	2.71829	3.40245	1.25169	0.323872
High	Master Protein	Q6DKJ4	Nucleoredoxin OS=Homo sapiens OX=9606 GN=NXN PE=1 SV=2	11	3	48.4	97.4	78.2	0.546577	0.684164	1.25173	0.323919
High	Master Protein	P83731	60S ribosomal protein L24 OS=Homo sapiens OX=9606 GN=RPL24 PE=1 SV=1	45	9	17.8	455.7	365.9	2.55724	3.20122	1.25183	0.324037
High	Master Protein	Q08J23	tRNA (cytosine(34)-C(5))-methyltransferase OS=Homo sapiens OX=9606 GN=NSUN2 PE=1 SV=2	15	8	86.4	250.3	201	1.4046	1.75853	1.25198	0.324209
High	Master Protein	Q7L1Q6	Basic leucine zipper and W2 domain-containing protein 1 OS=Homo sapiens OX=9606 GN=BZW1 PE=1 SV=1	28	12	48	613	492.3	3.43996	4.30709	1.25208	0.324323
High	Master Protein	Q8WUM4	Programmed cell death 6-interacting protein OS=Homo sapiens OX=9606 GN=PDCD6IP PE=1 SV=1	35	27	96	1310.1	1053.1	7.35185	9.21347	1.25322	0.325637
High	Master Protein	P20340	Ras-related protein Rab-6A OS=Homo sapiens OX=9606 GN=RAB6A PE=1 SV=3	23	6	23.6	98.9	79.5	0.554994	0.695538	1.25323	0.325656
High	Master Protein	Q32MZ4	Leucine-rich repeat flightless-interacting protein 1 OS=Homo sapiens OX=9606 GN=LRRFIP1 PE=1 SV=2	14	10	89.2	229.5	184.5	1.28788	1.61417	1.25336	0.325799
High	Master Protein	Q7Z5G4	Golgin subfamily A member 7 OS=Homo sapiens OX=9606 GN=GOLGA7 PE=1 SV=2	17	2	15.8	44.4	35.7	0.249158	0.312336	1.25356	0.326036
High	Master Protein	P32119	Peroxiredoxin-2 OS=Homo sapiens OX=9606 GN=PRDX2 PE=1 SV=5	36	5	21.9	587.6	472.5	3.29742	4.13386	1.25366	0.326152
High	Master Protein	P06737	Glycogen phosphorylase, liver form OS=Homo sapiens OX=9606 GN=PYGL PE=1 SV=4	30	26	97.1	1681.2	1351.9	9.43434	11.8276	1.25368	0.326169
High	Master Protein	P60228	Eukaryotic translation initiation factor 3 subunit E OS=Homo sapiens OX=9606 GN=EIF3E PE=1 SV=1	32	15	52.2	625.5	503.1	3.5101	4.40157	1.25397	0.326507
High	Master Protein	Q08380	Galectin-3-binding protein OS=Homo sapiens OX=9606 GN=LGALS3BP PE=1 SV=1	12	6	65.3	409.5	329.4	2.29798	2.88189	1.2541	0.326649
High	Master Protein	Q14318	Peptidyl-prolyl cis-trans isomerase FKBP8 OS=Homo sapiens OX=9606 GN=FKBP8 PE=1 SV=2	8	3	44.5	13.3	10.7	0.0746352	0.0936133	1.25428	0.326856
High	Master Protein	P08670	Vimentin OS=Homo sapiens OX=9606 GN=VIM PE=1 SV=4	77	69	53.6	4480	3604.5	25.1403	31.5354	1.25438	0.326972
High	Master Protein	P29992	Guanine nucleotide-binding protein subunit alpha-11 OS=Homo sapiens OX=9606 GN=GNA11 PE=1 SV=2	14	5	42.1	229.3	184.5	1.28676	1.61417	1.25445	0.327056
High	Master Protein	Q02878	60S ribosomal protein L6 OS=Homo sapiens OX=9606 GN=RPL6 PE=1 SV=3	29	12	32.7	1229.2	989.2	6.89787	8.65442	1.25465	0.327286
High	Master Protein	Q9BUQ8	Probable ATP-dependent RNA helicase DDX23 OS=Homo sapiens OX=9606 GN=DDX23 PE=1 SV=3	3	3	95.5	109.4	88.1	0.613917	0.770779	1.25551	0.328273
High	Master Protein	P35221	Catenin alpha-1 OS=Homo sapiens OX=9606 GN=CTNNA1 PE=1 SV=1	8	6	100	112.6	90.7	0.631874	0.793526	1.25583	0.32864
High	Master Protein	P78527	DNA-dependent protein kinase catalytic subunit OS=Homo sapiens OX=9606 GN=PRKDC PE=1 SV=3	16	57	468.8	2328.3	1875.6	13.0657	16.4094	1.25592	0.328747
High	Master Protein	P09429	High mobility group protein B1 OS=Homo sapiens OX=9606 GN=HMGB1 PE=1 SV=3	45	9	24.9	1260.9	1015.9	7.07576	8.88801	1.25612	0.328976
High	Master Protein	G3V2S9	SRA stem-loop-interacting RNA-binding protein, mitochondrial OS=Homo sapiens OX=9606 GN=SLIRP PE=1 SV=1	29	3	13.9	171.3	138.1	0.961279	1.20822	1.25689	0.32986
High	Master Protein	Q86VP6	Cullin-associated NEDD8-dissociated protein 1 OS=Homo sapiens OX=9606 GN=CAND1 PE=1 SV=2	8	10	136.3	544.9	439.4	3.0578	3.84427	1.2572	0.330215
High	Master Protein	P31153	S-adenosylmethionine synthase isoform type-2 OS=Homo sapiens OX=9606 GN=MAT2A PE=1 SV=1	16	7	43.6	337.4	272.2	1.89338	2.38145	1.25778	0.330879
High	Master Protein	P40261	Nicotinamide N-methyltransferase OS=Homo sapiens OX=9606 GN=NNMT PE=1 SV=1	9	2	29.6	38.3	30.9	0.214927	0.270341	1.25783	0.330934
High	Master Protein	P08134	Rho-related GTP-binding protein RhoC OS=Homo sapiens OX=9606 GN=RHOC PE=1 SV=1	33	7	22	70.4	56.8	0.395062	0.496938	1.25787	0.330987
High	Master Protein	O75116	Rho-associated protein kinase 2 OS=Homo sapiens OX=9606 GN=ROCK2 PE=1 SV=4	4	5	160.8	62.2	50.2	0.349046	0.439195	1.25827	0.331445
High	Master Protein	P50416	Carnitine O-palmitoyltransferase 1, liver isoform OS=Homo sapiens OX=9606 GN=CPT1A PE=1 SV=2	3	2	88.3	44.1	35.6	0.247475	0.311461	1.25856	0.331771
High	Master Protein	P40222	Alpha-taxilin OS=Homo sapiens OX=9606 GN=TXLNA PE=1 SV=3	8	3	61.9	104.3	84.2	0.585297	0.736658	1.2586	0.331825
High	Master Protein	A0A0A0MSW4	Phosphatidylinositol transfer protein beta isoform OS=Homo sapiens OX=9606 GN=PITPNB PE=1 SV=1	34	8	31.6	203.1	164	1.13973	1.43482	1.25891	0.332178
High	Master Protein	O95747	Serine/threonine-protein kinase OSR1 OS=Homo sapiens OX=9606 GN=OXSR1 PE=1 SV=1	17	7	58	394.9	318.9	2.21605	2.79003	1.25901	0.332289
High	Master Protein	O75821	Eukaryotic translation initiation factor 3 subunit G OS=Homo sapiens OX=9606 GN=EIF3G PE=1 SV=2	23	8	35.6	243.7	196.8	1.36756	1.72178	1.25902	0.332296
High	Master Protein	Q9NSD9	Phenylalanine--tRNA ligase beta subunit OS=Homo sapiens OX=9606 GN=FARSB PE=1 SV=3	16	9	66.1	430.3	347.5	2.4147	3.04024	1.25906	0.332342
High	Master Protein	P08708	40S ribosomal protein S17 OS=Homo sapiens OX=9606 GN=RPS17 PE=1 SV=2	63	10	15.5	1202.7	971.5	6.74916	8.49956	1.25935	0.332681
High	Master Protein	Q15417	Calponin-3 OS=Homo sapiens OX=9606 GN=CNN3 PE=1 SV=1	43	17	36.4	1244.4	1005.8	6.98316	8.79965	1.26012	0.333565
High	Master Protein	Q9UBR2	Cathepsin Z OS=Homo sapiens OX=9606 GN=CTSZ PE=1 SV=1	7	2	33.8	31.3	25.3	0.175645	0.221347	1.26019	0.333647
High	Master Protein	P52948	Nuclear pore complex protein Nup98-Nup96 OS=Homo sapiens OX=9606 GN=NUP98 PE=1 SV=4	1	2	197.5	232.3	187.8	1.30359	1.64304	1.2604	0.33388
High	Master Protein	Q12931	Heat shock protein 75 kDa, mitochondrial OS=Homo sapiens OX=9606 GN=TRAP1 PE=1 SV=3	11	9	80.1	379.1	306.5	2.12738	2.68154	1.26049	0.333981
High	Master Protein	P10599	Thioredoxin OS=Homo sapiens OX=9606 GN=TXN PE=1 SV=3	55	5	11.7	338.7	273.9	1.90067	2.39633	1.26078	0.334313
High	Master Protein	P62854	40S ribosomal protein S26 OS=Homo sapiens OX=9606 GN=RPS26 PE=1 SV=3	27	3	13	241.5	195.3	1.35522	1.70866	1.2608	0.334341
High	Master Protein	O15143	Actin-related protein 2/3 complex subunit 1B OS=Homo sapiens OX=9606 GN=ARPC1B PE=1 SV=3	23	7	40.9	315	254.8	1.76768	2.22922	1.2611	0.334685
High	Master Protein	Q14247	Src substrate cortactin OS=Homo sapiens OX=9606 GN=CTTN PE=1 SV=2	31	15	61.5	752.6	608.8	4.22334	5.32633	1.26116	0.334757
High	Master Protein	P61160	Actin-related protein 2 OS=Homo sapiens OX=9606 GN=ACTR2 PE=1 SV=1	18	7	44.7	289.9	234.6	1.62682	2.05249	1.26166	0.33532
High	Master Protein	O14979	Heterogeneous nuclear ribonucleoprotein D-like OS=Homo sapiens OX=9606 GN=HNRNPDL PE=1 SV=3	20	8	46.4	174.2	141	0.977553	1.2336	1.26192	0.335622
High	Master Protein	P61604	10 kDa heat shock protein, mitochondrial OS=Homo sapiens OX=9606 GN=HSPE1 PE=1 SV=2	57	7	10.9	1077.2	872	6.04489	7.62905	1.26206	0.335786
High	Master Protein	P39019	40S ribosomal protein S19 OS=Homo sapiens OX=9606 GN=RPS19 PE=1 SV=2	50	11	16.1	773.5	626.2	4.34063	5.47857	1.26216	0.335894
High	Master Protein	Q9P0L0	Vesicle-associated membrane protein-associated protein A OS=Homo sapiens OX=9606 GN=VAPA PE=1 SV=3	19	6	27.9	411.3	333.1	2.30808	2.91426	1.26263	0.336436
High	Master Protein	Q9NTJ3	Structural maintenance of chromosomes protein 4 OS=Homo sapiens OX=9606 GN=SMC4 PE=1 SV=2	5	7	147.1	375.8	304.4	2.10887	2.66317	1.26284	0.336675
High	Master Protein	O14964	Hepatocyte growth factor-regulated tyrosine kinase substrate OS=Homo sapiens OX=9606 GN=HGS PE=1 SV=1	11	7	86.1	341.6	276.7	1.91695	2.42082	1.26285	0.336687
High	Master Protein	O75844	CAAX prenyl protease 1 homolog OS=Homo sapiens OX=9606 GN=ZMPSTE24 PE=1 SV=2	10	5	54.8	121.1	98.1	0.679574	0.858268	1.26295	0.336798
High	Master Protein	P00367	Glutamate dehydrogenase 1, mitochondrial OS=Homo sapiens OX=9606 GN=GLUD1 PE=1 SV=2	31	14	61.4	712.5	577.2	3.99832	5.04987	1.263	0.336853
High	Master Protein	Q8TAT6	Nuclear protein localization protein 4 homolog OS=Homo sapiens OX=9606 GN=NPLOC4 PE=1 SV=3	6	3	68.1	94.3	76.4	0.529181	0.668416	1.26312	0.336987
High	Master Protein	O75828	Carbonyl reductase [NADPH] 3 OS=Homo sapiens OX=9606 GN=CBR3 PE=1 SV=3	28	5	30.8	24.8	20.1	0.139169	0.175853	1.26359	0.337527
High	Master Protein	P04792	Heat shock protein beta-1 OS=Homo sapiens OX=9606 GN=HSPB1 PE=1 SV=2	36	7	22.8	180.2	146.1	1.01122	1.27822	1.26403	0.338029
High	Master Protein	O00629	Importin subunit alpha-3 OS=Homo sapiens OX=9606 GN=KPNA4 PE=1 SV=1	20	6	57.9	122.6	99.4	0.687991	0.869641	1.26403	0.338031
High	Master Protein	P52272	Heterogeneous nuclear ribonucleoprotein M OS=Homo sapiens OX=9606 GN=HNRNPM PE=1 SV=3	31	23	77.5	1438	1166.1	8.06958	10.2021	1.26427	0.3383
High	Master Protein	A6NDG6	Glycerol-3-phosphate phosphatase OS=Homo sapiens OX=9606 GN=PGP PE=1 SV=1	9	2	34	107.9	87.5	0.605499	0.765529	1.26429	0.338332
High	Master Protein	P53990	IST1 homolog OS=Homo sapiens OX=9606 GN=IST1 PE=1 SV=1	7	2	39.7	74.1	60.1	0.415825	0.525809	1.2645	0.338563
High	Master Protein	Q92896	Golgi apparatus protein 1 OS=Homo sapiens OX=9606 GN=GLG1 PE=1 SV=2	3	3	134.5	84.2	68.3	0.472503	0.59755	1.26465	0.338737
High	Master Protein	Q8IXB1	DnaJ homolog subfamily C member 10 OS=Homo sapiens OX=9606 GN=DNAJC10 PE=1 SV=2	3	2	91	30.2	24.5	0.169473	0.214348	1.2648	0.338905
High	Master Protein	Q15386	Ubiquitin-protein ligase E3C OS=Homo sapiens OX=9606 GN=UBE3C PE=1 SV=3	2	2	123.8	90.6	73.5	0.508418	0.643045	1.2648	0.338905
High	Master Protein	P50990	T-complex protein 1 subunit theta OS=Homo sapiens OX=9606 GN=CCT8 PE=1 SV=4	45	26	59.6	1891.6	1535.3	10.615	13.4322	1.26539	0.339585
High	Master Protein	P07814	Bifunctional glutamate/proline--tRNA ligase OS=Homo sapiens OX=9606 GN=EPRS PE=1 SV=5	18	21	170.5	714.8	580.2	4.01122	5.07612	1.26548	0.339683
High	Master Protein	Q15637	Splicing factor 1 OS=Homo sapiens OX=9606 GN=SF1 PE=1 SV=4	6	4	68.3	125.4	101.8	0.703704	0.890639	1.26564	0.339872
High	Master Protein	Q7Z6Z7	E3 ubiquitin-protein ligase HUWE1 OS=Homo sapiens OX=9606 GN=HUWE1 PE=1 SV=3	6	21	481.6	509.6	413.8	2.85971	3.6203	1.26597	0.34024
High	Master Protein	P29401	Transketolase OS=Homo sapiens OX=9606 GN=TKT PE=1 SV=3	43	23	67.8	1878.7	1525.6	10.5426	13.3473	1.26603	0.340314
High	Master Protein	O15460	Prolyl 4-hydroxylase subunit alpha-2 OS=Homo sapiens OX=9606 GN=P4HA2 PE=1 SV=1	7	3	60.9	43.1	35	0.241863	0.306212	1.26605	0.340339
High	Master Protein	O43395	U4/U6 small nuclear ribonucleoprotein Prp3 OS=Homo sapiens OX=9606 GN=PRPF3 PE=1 SV=2	4	3	77.5	180.4	146.5	1.01235	1.28171	1.26608	0.340373
High	Master Protein	Q9BQA1	Methylosome protein 50 OS=Homo sapiens OX=9606 GN=WDR77 PE=1 SV=1	8	2	36.7	59.1	48	0.33165	0.419948	1.26624	0.340548
High	Master Protein	Q9UK76	Jupiter microtubule associated homolog 1 OS=Homo sapiens OX=9606 GN=JPT1 PE=1 SV=3	25	2	16	49.6	40.3	0.278339	0.352581	1.26673	0.341112
High	Master Protein	P30740	Leukocyte elastase inhibitor OS=Homo sapiens OX=9606 GN=SERPINB1 PE=1 SV=1	32	11	42.7	462.4	375.8	2.59484	3.28784	1.26707	0.341496
High	Master Protein	P49321	Nuclear autoantigenic sperm protein OS=Homo sapiens OX=9606 GN=NASP PE=1 SV=2	15	10	85.2	457.2	371.6	2.56566	3.25109	1.26716	0.341597
High	Master Protein	P60866	40S ribosomal protein S20 OS=Homo sapiens OX=9606 GN=RPS20 PE=1 SV=1	25	3	13.4	304.4	247.5	1.70819	2.16535	1.26763	0.342132
High	Master Protein	A0A1W2PRS1	Lysosome membrane protein 2 (Fragment) OS=Homo sapiens OX=9606 GN=SCARB2 PE=1 SV=1	4	3	58.1	21.4	17.4	0.12009	0.152231	1.26764	0.342148
High	Master Protein	P27695	DNA-(apurinic or apyrimidinic site) lyase OS=Homo sapiens OX=9606 GN=APEX1 PE=1 SV=2	37	10	35.5	399.7	325	2.24299	2.84339	1.26768	0.342194
High	Master Protein	A0A0U1RQC9	Cellular tumor antigen p53 OS=Homo sapiens OX=9606 GN=TP53 PE=1 SV=1	16	6	45.9	106.5	86.6	0.597643	0.757655	1.26774	0.342257
High	Master Protein	Q16643	Drebrin OS=Homo sapiens OX=9606 GN=DBN1 PE=1 SV=4	4	2	71.4	24.1	19.6	0.135241	0.171479	1.26795	0.342492
High	Master Protein	P23246	Splicing factor, proline- and glutamine-rich OS=Homo sapiens OX=9606 GN=SFPQ PE=1 SV=2	27	18	76.1	623.2	507	3.49719	4.4357	1.26836	0.342962
High	Master Protein	P04183	Thymidine kinase, cytosolic OS=Homo sapiens OX=9606 GN=TK1 PE=1 SV=2	18	4	25.5	146	118.8	0.819304	1.03937	1.2686	0.343238
High	Master Protein	Q12797	Aspartyl/asparaginyl beta-hydroxylase OS=Homo sapiens OX=9606 GN=ASPH PE=1 SV=3	13	6	85.8	231.4	188.3	1.29854	1.64742	1.26867	0.343316
High	Master Protein	O94905	Erlin-2 OS=Homo sapiens OX=9606 GN=ERLIN2 PE=1 SV=1	18	6	37.8	225.2	183.3	1.26375	1.60367	1.26898	0.343672
High	Master Protein	Q8TB61	Adenosine 3'-phospho 5'-phosphosulfate transporter 1 OS=Homo sapiens OX=9606 GN=SLC35B2 PE=1 SV=1	8	3	47.5	60.2	49	0.337823	0.428696	1.269	0.34369
High	Master Protein	P40763	Signal transducer and activator of transcription 3 OS=Homo sapiens OX=9606 GN=STAT3 PE=1 SV=2	8	5	88	167.3	136.2	0.938833	1.1916	1.26924	0.343961
High	Master Protein	Q9BV40	Vesicle-associated membrane protein 8 OS=Homo sapiens OX=9606 GN=VAMP8 PE=1 SV=1	30	3	11.4	179.7	146.3	1.00842	1.27997	1.26928	0.344011
High	Master Protein	Q9H0U4	Ras-related protein Rab-1B OS=Homo sapiens OX=9606 GN=RAB1B PE=1 SV=1	53	10	22.2	477.9	389.1	2.68182	3.4042	1.26936	0.344104
High	Master Protein	Q14166	Tubulin--tyrosine ligase-like protein 12 OS=Homo sapiens OX=9606 GN=TTLL12 PE=1 SV=2	9	4	74.4	37.2	30.3	0.208754	0.265092	1.26988	0.344687
High	Master Protein	Q99733	Nucleosome assembly protein 1-like 4 OS=Homo sapiens OX=9606 GN=NAP1L4 PE=1 SV=1	7	3	42.8	151.5	123.4	0.850168	1.07962	1.26988	0.344697
High	Master Protein	Q52LJ0	Protein FAM98B OS=Homo sapiens OX=9606 GN=FAM98B PE=1 SV=1	15	4	37.2	27.5	22.4	0.154321	0.195976	1.26992	0.344739
High	Master Protein	Q15021	Condensin complex subunit 1 OS=Homo sapiens OX=9606 GN=NCAPD2 PE=1 SV=3	5	6	157.1	410	334	2.30079	2.92213	1.27006	0.344896
High	Master Protein	Q86UP2	Kinectin OS=Homo sapiens OX=9606 GN=KTN1 PE=1 SV=1	26	33	156.2	1614.7	1315.4	9.06117	11.5083	1.27007	0.344907
High	Master Protein	Q13155	Aminoacyl tRNA synthase complex-interacting multifunctional protein 2 OS=Homo sapiens OX=9606 GN=AIMP2 PE=1 SV=2	12	4	35.3	139.7	113.9	0.783951	0.9965	1.27113	0.346108
High	Master Protein	Q99613	Eukaryotic translation initiation factor 3 subunit C OS=Homo sapiens OX=9606 GN=EIF3C PE=1 SV=1	15	15	105.3	930.6	759.1	5.22222	6.64129	1.27174	0.346801
High	Master Protein	O00410	Importin-5 OS=Homo sapiens OX=9606 GN=IPO5 PE=1 SV=4	21	19	123.6	1162.5	948.3	6.52357	8.29659	1.27179	0.346857
High	Master Protein	P30419	Glycylpeptide N-tetradecanoyltransferase 1 OS=Homo sapiens OX=9606 GN=NMT1 PE=1 SV=2	20	9	56.8	387.1	315.8	2.17228	2.7629	1.27189	0.346977
High	Master Protein	P30048	Thioredoxin-dependent peroxide reductase, mitochondrial OS=Homo sapiens OX=9606 GN=PRDX3 PE=1 SV=3	27	5	27.7	516	421.2	2.89562	3.68504	1.27262	0.347806
High	Master Protein	Q92522	Histone H1x OS=Homo sapiens OX=9606 GN=H1FX PE=1 SV=1	16	3	22.5	99.2	81	0.556678	0.708661	1.27302	0.348254
High	Master Protein	Q14165	Malectin OS=Homo sapiens OX=9606 GN=MLEC PE=1 SV=1	29	7	32.2	326.6	266.7	1.83277	2.33333	1.27312	0.348365
High	Master Protein	Q6S8J3	POTE ankyrin domain family member E OS=Homo sapiens OX=9606 GN=POTEE PE=2 SV=3	10	28	121.3	25.1	20.5	0.140853	0.179353	1.27333	0.348608
High	Master Protein	P20700	Lamin-B1 OS=Homo sapiens OX=9606 GN=LMNB1 PE=1 SV=2	50	31	66.4	1244.5	1016.6	6.98373	8.89414	1.27355	0.348858
High	Master Protein	Q15459	Splicing factor 3A subunit 1 OS=Homo sapiens OX=9606 GN=SF3A1 PE=1 SV=1	16	9	88.8	261.8	213.9	1.46914	1.87139	1.2738	0.349143
High	Master Protein	P31948	Stress-induced-phosphoprotein 1 OS=Homo sapiens OX=9606 GN=STIP1 PE=1 SV=1	40	25	62.6	2706.6	2212.8	15.1886	19.3596	1.27462	0.350063
High	Master Protein	P07737	Profilin-1 OS=Homo sapiens OX=9606 GN=PFN1 PE=1 SV=2	73	23	15	1542.9	1261.5	8.65825	11.0367	1.27471	0.350168
High	Master Protein	P51571	Translocon-associated protein subunit delta OS=Homo sapiens OX=9606 GN=SSR4 PE=1 SV=1	14	3	19	75.2	61.5	0.421998	0.538058	1.27503	0.350526
High	Master Protein	Q6WCQ1	Myosin phosphatase Rho-interacting protein OS=Homo sapiens OX=9606 GN=MPRIP PE=1 SV=3	7	5	116.5	115.4	94.4	0.647587	0.825897	1.27534	0.350887
High	Master Protein	A0A087WYR3	Tumor protein D54 OS=Homo sapiens OX=9606 GN=TPD52L2 PE=1 SV=1	45	11	23.8	416.6	340.8	2.33782	2.98163	1.27539	0.350934
High	Master Protein	P27348	14-3-3 protein theta OS=Homo sapiens OX=9606 GN=YWHAQ PE=1 SV=1	56	18	27.7	219.9	180	1.23401	1.5748	1.27617	0.351821
High	Master Protein	Q8TCJ2	Dolichyl-diphosphooligosaccharide--protein glycosyltransferase subunit STT3B OS=Homo sapiens OX=9606 GN=STT3B PE=1 SV=1	5	5	93.6	289.4	237.1	1.62402	2.07437	1.2773	0.353103
High	Master Protein	Q9BZZ5	Apoptosis inhibitor 5 OS=Homo sapiens OX=9606 GN=API5 PE=1 SV=3	18	10	59	315.4	258.5	1.76992	2.26159	1.27779	0.353654
High	Master Protein	O60506	Heterogeneous nuclear ribonucleoprotein Q OS=Homo sapiens OX=9606 GN=SYNCRIP PE=1 SV=2	40	23	69.6	1876.5	1538.4	10.5303	13.4593	1.27815	0.354058
High	Master Protein	Q15061	WD repeat-containing protein 43 OS=Homo sapiens OX=9606 GN=WDR43 PE=1 SV=3	2	2	74.8	56.1	46	0.314815	0.40245	1.27837	0.354305
High	Master Protein	Q5T5C7	Serine--tRNA ligase, cytoplasmic OS=Homo sapiens OX=9606 GN=SARS PE=1 SV=1	16	9	61.3	403.2	330.7	2.26263	2.89326	1.27872	0.354699
High	Master Protein	O95831	Apoptosis-inducing factor 1, mitochondrial OS=Homo sapiens OX=9606 GN=AIFM1 PE=1 SV=1	18	10	66.9	491.1	402.8	2.75589	3.52406	1.27874	0.354719
High	Master Protein	Q8WU90	Zinc finger CCCH domain-containing protein 15 OS=Homo sapiens OX=9606 GN=ZC3H15 PE=1 SV=1	15	5	48.6	118.1	96.9	0.662738	0.847769	1.27919	0.355232
High	Master Protein	O75400	Pre-mRNA-processing factor 40 homolog A OS=Homo sapiens OX=9606 GN=PRPF40A PE=1 SV=2	3	3	108.7	29	23.8	0.162738	0.208224	1.2795	0.355581
High	Master Protein	E7ESC6	Exportin-7 OS=Homo sapiens OX=9606 GN=XPO7 PE=1 SV=1	2	2	124	65.9	54.1	0.369809	0.473316	1.27989	0.356022
High	Master Protein	Q99567	Nuclear pore complex protein Nup88 OS=Homo sapiens OX=9606 GN=NUP88 PE=1 SV=2	6	4	83.5	51.4	42.2	0.28844	0.369204	1.28	0.356147
High	Master Protein	J3KQ32	Obg-like ATPase 1 OS=Homo sapiens OX=9606 GN=OLA1 PE=1 SV=1	32	12	46.9	956.1	785	5.36532	6.86789	1.28005	0.356203
High	Master Protein	O43719	HIV Tat-specific factor 1 OS=Homo sapiens OX=9606 GN=HTATSF1 PE=1 SV=1	3	2	85.8	63.2	51.9	0.354658	0.454068	1.2803	0.356482
High	Master Protein	Q9ULC3	Ras-related protein Rab-23 OS=Homo sapiens OX=9606 GN=RAB23 PE=1 SV=1	19	3	26.6	122	100.2	0.684624	0.87664	1.28047	0.356673
High	Master Protein	Q9BVC6	Transmembrane protein 109 OS=Homo sapiens OX=9606 GN=TMEM109 PE=1 SV=1	9	2	26.2	71.7	58.9	0.402357	0.515311	1.28073	0.356966
High	Master Protein	P24534	Elongation factor 1-beta OS=Homo sapiens OX=9606 GN=EEF1B2 PE=1 SV=3	45	9	24.7	688	565.2	3.86083	4.94488	1.28078	0.357025
High	Master Protein	Q12765	Secernin-1 OS=Homo sapiens OX=9606 GN=SCRN1 PE=1 SV=2	10	4	46.4	130.6	107.3	0.732884	0.938758	1.28091	0.357167
High	Master Protein	P30050	60S ribosomal protein L12 OS=Homo sapiens OX=9606 GN=RPL12 PE=1 SV=1	42	7	17.8	395.9	325.3	2.22166	2.84602	1.28103	0.357307
High	Master Protein	P36578	60S ribosomal protein L4 OS=Homo sapiens OX=9606 GN=RPL4 PE=1 SV=5	33	14	47.7	1077.1	885.2	6.04433	7.74453	1.28129	0.357595
High	Master Protein	Q8NE71	ATP-binding cassette sub-family F member 1 OS=Homo sapiens OX=9606 GN=ABCF1 PE=1 SV=2	12	8	95.9	232.7	191.3	1.30584	1.67367	1.28168	0.358038
High	Master Protein	P62714	Serine/threonine-protein phosphatase 2A catalytic subunit beta isoform OS=Homo sapiens OX=9606 GN=PPP2CB PE=1 SV=1	26	8	35.6	165.3	135.9	0.927609	1.18898	1.28176	0.358131
High	Master Protein	K7ER00	Phenylalanine--tRNA ligase alpha subunit OS=Homo sapiens OX=9606 GN=FARSA PE=1 SV=1	16	6	62.4	144.6	118.9	0.811448	1.04024	1.28196	0.358353
High	Master Protein	P61313	60S ribosomal protein L15 OS=Homo sapiens OX=9606 GN=RPL15 PE=1 SV=2	39	8	24.1	1005.5	826.8	5.64254	7.2336	1.28198	0.358369
High	Master Protein	A0A0A0MSI8	Exocyst complex component 5 OS=Homo sapiens OX=9606 GN=EXOC5 PE=1 SV=1	5	3	82.1	142.5	117.2	0.799663	1.02537	1.28225	0.358683
High	Master Protein	Q9NUQ9	Protein FAM49B OS=Homo sapiens OX=9606 GN=FAM49B PE=1 SV=1	35	8	36.7	395	324.9	2.21661	2.84252	1.28237	0.358815
High	Master Protein	P22102	Trifunctional purine biosynthetic protein adenosine-3 OS=Homo sapiens OX=9606 GN=GART PE=1 SV=1	11	12	107.7	570.3	469.1	3.20034	4.10411	1.2824	0.358846
High	Master Protein	Q13435	Splicing factor 3B subunit 2 OS=Homo sapiens OX=9606 GN=SF3B2 PE=1 SV=2	17	15	100.2	937.6	771.3	5.2615	6.74803	1.28253	0.358991
High	Master Protein	P61981	14-3-3 protein gamma OS=Homo sapiens OX=9606 GN=YWHAG PE=1 SV=2	58	20	28.3	658.2	541.5	3.6936	4.73753	1.28263	0.359107
High	Master Protein	A0A087WVQ6	Clathrin heavy chain OS=Homo sapiens OX=9606 GN=CLTC PE=1 SV=1	46	62	191.9	2996.4	2465.2	16.8148	21.5678	1.28267	0.359146
High	Master Protein	Q9BS26	Endoplasmic reticulum resident protein 44 OS=Homo sapiens OX=9606 GN=ERP44 PE=1 SV=1	16	6	46.9	211.8	174.3	1.18855	1.52493	1.28302	0.359542
High	Master Protein	P23921	Ribonucleoside-diphosphate reductase large subunit OS=Homo sapiens OX=9606 GN=RRM1 PE=1 SV=1	6	4	90	157.7	129.8	0.884961	1.13561	1.28323	0.35978
High	Master Protein	P00533	Epidermal growth factor receptor OS=Homo sapiens OX=9606 GN=EGFR PE=1 SV=2	13	13	134.2	638.8	525.8	3.58474	4.60017	1.28327	0.359822
High	Master Protein	Q9H2G2	STE20-like serine/threonine-protein kinase OS=Homo sapiens OX=9606 GN=SLK PE=1 SV=1	9	9	142.6	140.2	115.4	0.786756	1.00962	1.28327	0.359829
High	Master Protein	O43681	ATPase ASNA1 OS=Homo sapiens OX=9606 GN=ASNA1 PE=1 SV=2	13	5	38.8	365.2	300.6	2.04938	2.62992	1.28327	0.35983
High	Master Protein	Q15046	Lysine--tRNA ligase OS=Homo sapiens OX=9606 GN=KARS PE=1 SV=3	12	5	68	58.4	48.1	0.327722	0.420822	1.28408	0.36074
High	Master Protein	P30085	UMP-CMP kinase OS=Homo sapiens OX=9606 GN=CMPK1 PE=1 SV=3	27	4	22.2	142.9	117.7	0.801908	1.02975	1.28412	0.36078
High	Master Protein	Q12983	BCL2/adenovirus E1B 19 kDa protein-interacting protein 3 OS=Homo sapiens OX=9606 GN=BNIP3 PE=1 SV=3	8	2	27.8	12.5	10.3	0.0701459	0.0901137	1.28466	0.361388
High	Master Protein	P11216	Glycogen phosphorylase, brain form OS=Homo sapiens OX=9606 GN=PYGB PE=1 SV=5	35	27	96.6	1604.2	1322.1	9.00224	11.5669	1.28489	0.361649
High	Master Protein	Q08752	Peptidyl-prolyl cis-trans isomerase D OS=Homo sapiens OX=9606 GN=PPID PE=1 SV=3	9	4	40.7	75.7	62.4	0.424804	0.545932	1.28514	0.361925
High	Master Protein	Q9UBE0	SUMO-activating enzyme subunit 1 OS=Homo sapiens OX=9606 GN=SAE1 PE=1 SV=1	16	5	38.4	222.9	184	1.25084	1.6098	1.28697	0.363981
High	Master Protein	P30260	Cell division cycle protein 27 homolog OS=Homo sapiens OX=9606 GN=CDC27 PE=1 SV=2	4	3	91.8	41.3	34.1	0.231762	0.298338	1.28726	0.364302
High	Master Protein	P40227	T-complex protein 1 subunit zeta OS=Homo sapiens OX=9606 GN=CCT6A PE=1 SV=3	29	14	58	830.3	686.1	4.65937	6.00262	1.28829	0.365458
High	Master Protein	Q9UNF0	Protein kinase C and casein kinase substrate in neurons protein 2 OS=Homo sapiens OX=9606 GN=PACSIN2 PE=1 SV=2	19	9	55.7	484.5	400.4	2.71886	3.50306	1.28843	0.365617
High	Master Protein	P83111	Serine beta-lactamase-like protein LACTB, mitochondrial OS=Homo sapiens OX=9606 GN=LACTB PE=1 SV=2	4	2	60.7	12.1	10	0.0679012	0.0874891	1.28848	0.365665
High	Master Protein	Q16831	Uridine phosphorylase 1 OS=Homo sapiens OX=9606 GN=UPP1 PE=1 SV=1	7	2	33.9	32.9	27.2	0.184624	0.23797	1.28895	0.366191
High	Master Protein	P35580	Myosin-10 OS=Homo sapiens OX=9606 GN=MYH10 PE=1 SV=3	12	23	228.9	233.9	193.4	1.31257	1.69204	1.2891	0.366368
High	Master Protein	F6TLX2	Glyoxalase domain-containing protein 4 OS=Homo sapiens OX=9606 GN=GLOD4 PE=1 SV=1	12	5	54.7	398.6	329.6	2.23681	2.88364	1.28917	0.366446
High	Master Protein	Q15084	Protein disulfide-isomerase A6 OS=Homo sapiens OX=9606 GN=PDIA6 PE=1 SV=1	29	10	48.1	305.1	252.3	1.71212	2.20735	1.28925	0.36653
High	Master Protein	Q8NC56	LEM domain-containing protein 2 OS=Homo sapiens OX=9606 GN=LEMD2 PE=1 SV=1	8	3	56.9	28.9	23.9	0.162177	0.209099	1.28932	0.366613
High	Master Protein	Q9BTE3	Mini-chromosome maintenance complex-binding protein OS=Homo sapiens OX=9606 GN=MCMBP PE=1 SV=2	5	3	72.9	124.9	103.3	0.700898	0.903762	1.28943	0.366739
High	Master Protein	Q14974	Importin subunit beta-1 OS=Homo sapiens OX=9606 GN=KPNB1 PE=1 SV=2	31	24	97.1	1005	831.3	5.63973	7.27297	1.28959	0.366918
High	Master Protein	Q04917	14-3-3 protein eta OS=Homo sapiens OX=9606 GN=YWHAH PE=1 SV=4	54	16	28.2	685.3	566.9	3.84568	4.95976	1.2897	0.367031
High	Master Protein	P51148	Ras-related protein Rab-5C OS=Homo sapiens OX=9606 GN=RAB5C PE=1 SV=2	49	8	23.5	478.2	395.6	2.6835	3.46107	1.28976	0.3671
High	Master Protein	Q5JSH3	WD repeat-containing protein 44 OS=Homo sapiens OX=9606 GN=WDR44 PE=1 SV=1	2	2	101.3	46.9	38.8	0.263187	0.339458	1.28979	0.367141
High	Master Protein	P49368	T-complex protein 1 subunit gamma OS=Homo sapiens OX=9606 GN=CCT3 PE=1 SV=4	51	23	60.5	1276	1056	7.16049	9.23885	1.29025	0.367653
High	Master Protein	Q15056	Eukaryotic translation initiation factor 4H OS=Homo sapiens OX=9606 GN=EIF4H PE=1 SV=5	19	6	27.4	501.8	415.4	2.81594	3.6343	1.29062	0.368061
High	Master Protein	P18085	ADP-ribosylation factor 4 OS=Homo sapiens OX=9606 GN=ARF4 PE=1 SV=3	45	10	20.5	1083.3	896.8	6.07912	7.84602	1.29065	0.368097
High	Master Protein	Q12904	Aminoacyl tRNA synthase complex-interacting multifunctional protein 1 OS=Homo sapiens OX=9606 GN=AIMP1 PE=1 SV=2	13	3	34.3	142.6	118.1	0.800224	1.03325	1.2912	0.368707
High	Master Protein	O94760	N(G),N(G)-dimethylarginine dimethylaminohydrolase 1 OS=Homo sapiens OX=9606 GN=DDAH1 PE=1 SV=3	18	5	31.1	274.2	227.2	1.53872	1.98775	1.29182	0.369406
High	Master Protein	P39748	Flap endonuclease 1 OS=Homo sapiens OX=9606 GN=FEN1 PE=1 SV=1	22	7	42.6	400.9	332.3	2.24972	2.90726	1.29228	0.369916
High	Master Protein	Q14669	E3 ubiquitin-protein ligase TRIP12 OS=Homo sapiens OX=9606 GN=TRIP12 PE=1 SV=1	3	3	220.3	38	31.5	0.213244	0.275591	1.29237	0.370024
High	Master Protein	B1AKJ5	Nardilysin OS=Homo sapiens OX=9606 GN=NRDC PE=1 SV=1	5	6	139.3	110	91.2	0.617284	0.7979	1.2926	0.370274
High	Master Protein	F5H5D3	Tubulin alpha chain OS=Homo sapiens OX=9606 GN=TUBA1C PE=1 SV=1	52	43	57.7	2972	2464.6	16.6779	21.5626	1.29288	0.370591
High	Master Protein	Q9HB90	Ras-related GTP-binding protein C OS=Homo sapiens OX=9606 GN=RRAGC PE=1 SV=1	8	3	44.2	21.1	17.5	0.118406	0.153106	1.29306	0.370784
High	Master Protein	Q13523	Serine/threonine-protein kinase PRP4 homolog OS=Homo sapiens OX=9606 GN=PRPF4B PE=1 SV=3	2	2	116.9	48.2	40	0.270483	0.349956	1.29382	0.371639
High	Master Protein	P52907	F-actin-capping protein subunit alpha-1 OS=Homo sapiens OX=9606 GN=CAPZA1 PE=1 SV=3	57	11	32.9	447.3	371.3	2.5101	3.24847	1.29416	0.372014
High	Master Protein	Q92900	Regulator of nonsense transcripts 1 OS=Homo sapiens OX=9606 GN=UPF1 PE=1 SV=2	14	13	124.3	392.1	325.5	2.20034	2.84777	1.29424	0.372108
High	Master Protein	P20290	Transcription factor BTF3 OS=Homo sapiens OX=9606 GN=BTF3 PE=1 SV=1	22	3	22.2	92.6	76.9	0.519641	0.672791	1.29472	0.372643
High	Master Protein	Q13451	Peptidyl-prolyl cis-trans isomerase FKBP5 OS=Homo sapiens OX=9606 GN=FKBP5 PE=1 SV=2	11	3	51.2	69.8	58	0.391695	0.507437	1.29549	0.373498
High	Master Protein	Q9UIJ7	GTP:AMP phosphotransferase AK3, mitochondrial OS=Homo sapiens OX=9606 GN=AK3 PE=1 SV=4	8	2	25.6	229.8	191	1.28956	1.67104	1.29582	0.373866
High	Master Protein	J3KPP4	Cisplatin resistance-associated overexpressed protein, isoform CRA_b OS=Homo sapiens OX=9606 GN=LUC7L3 PE=1 SV=1	13	5	58.2	54.6	45.4	0.306397	0.3972	1.29636	0.374463
High	Master Protein	Q13509	Tubulin beta-3 chain OS=Homo sapiens OX=9606 GN=TUBB3 PE=1 SV=2	35	26	50.4	123.7	102.9	0.694164	0.900262	1.2969	0.375069
High	Master Protein	P78371	T-complex protein 1 subunit beta OS=Homo sapiens OX=9606 GN=CCT2 PE=1 SV=4	37	20	57.5	1292.9	1075.9	7.25533	9.41295	1.29738	0.375605
High	Master Protein	P18077	60S ribosomal protein L35a OS=Homo sapiens OX=9606 GN=RPL35A PE=1 SV=2	38	5	12.5	627.6	522.3	3.52189	4.56955	1.29747	0.375705
High	Master Protein	Q00325	Phosphate carrier protein, mitochondrial OS=Homo sapiens OX=9606 GN=SLC25A3 PE=1 SV=2	19	8	40.1	526.6	438.5	2.95511	3.8364	1.29823	0.376541
High	Master Protein	P50914	60S ribosomal protein L14 OS=Homo sapiens OX=9606 GN=RPL14 PE=1 SV=4	18	4	23.4	386.9	322.2	2.17116	2.8189	1.29834	0.376668
High	Master Protein	P07858	Cathepsin B OS=Homo sapiens OX=9606 GN=CTSB PE=1 SV=3	9	3	37.8	80.9	67.4	0.453984	0.589676	1.29889	0.377281
High	Master Protein	Q9Y678	Coatomer subunit gamma-1 OS=Homo sapiens OX=9606 GN=COPG1 PE=1 SV=1	18	14	97.7	708	590	3.97306	5.16185	1.29921	0.377638
High	Master Protein	Q9Y2L1	Exosome complex exonuclease RRP44 OS=Homo sapiens OX=9606 GN=DIS3 PE=1 SV=2	3	2	108.9	91.8	76.5	0.515152	0.669291	1.29921	0.377638
High	Master Protein	Q9NRX4	14 kDa phosphohistidine phosphatase OS=Homo sapiens OX=9606 GN=PHPT1 PE=1 SV=1	36	4	13.8	156	130.1	0.875421	1.13823	1.30021	0.378747
High	Master Protein	P00338	L-lactate dehydrogenase A chain OS=Homo sapiens OX=9606 GN=LDHA PE=1 SV=2	61	25	36.7	2382	1986.6	13.367	17.3806	1.30026	0.3788
High	Master Protein	Q92878	DNA repair protein RAD50 OS=Homo sapiens OX=9606 GN=RAD50 PE=1 SV=1	3	4	153.8	71.7	59.8	0.402357	0.523185	1.3003	0.378844
High	Master Protein	E9PF18	Hydroxyacyl-coenzyme A dehydrogenase, mitochondrial OS=Homo sapiens OX=9606 GN=HADH PE=1 SV=2	10	4	42.1	248.1	207	1.39226	1.81102	1.30078	0.379381
High	Master Protein	P53007	Tricarboxylate transport protein, mitochondrial OS=Homo sapiens OX=9606 GN=SLC25A1 PE=1 SV=2	14	4	34	113.5	94.7	0.636925	0.828521	1.30082	0.379416
High	Master Protein	P68366	Tubulin alpha-4A chain OS=Homo sapiens OX=9606 GN=TUBA4A PE=1 SV=1	53	39	49.9	359.1	299.7	2.01515	2.62205	1.30117	0.379805
High	Master Protein	Q9Y399	28S ribosomal protein S2, mitochondrial OS=Homo sapiens OX=9606 GN=MRPS2 PE=1 SV=1	6	2	33.2	119.2	99.5	0.668911	0.870516	1.30139	0.380056
High	Master Protein	E5RJR5	S-phase kinase-associated protein 1 OS=Homo sapiens OX=9606 GN=SKP1 PE=1 SV=1	16	3	18.7	124.1	103.6	0.696409	0.906387	1.30152	0.380193
High	Master Protein	Q9Y224	RNA transcription, translation and transport factor protein OS=Homo sapiens OX=9606 GN=RTRAF PE=1 SV=1	11	3	28.1	152.6	127.4	0.856341	1.11461	1.3016	0.380282
High	Master Protein	Q96DG6	Carboxymethylenebutenolidase homolog OS=Homo sapiens OX=9606 GN=CMBL PE=1 SV=1	11	3	28	127.9	106.8	0.717733	0.934383	1.30185	0.380567
High	Master Protein	Q13148	TAR DNA-binding protein 43 OS=Homo sapiens OX=9606 GN=TARDBP PE=1 SV=1	6	2	44.7	82.6	69	0.463524	0.603675	1.30236	0.381127
High	Master Protein	P47914	60S ribosomal protein L29 OS=Homo sapiens OX=9606 GN=RPL29 PE=1 SV=2	19	3	17.7	537	448.6	3.01347	3.92476	1.30241	0.381179
High	Master Protein	P04732	Metallothionein-1E OS=Homo sapiens OX=9606 GN=MT1E PE=1 SV=1	33	2	6	23.1	19.3	0.12963	0.168854	1.30259	0.38138
High	Master Protein	Q9UBT2	SUMO-activating enzyme subunit 2 OS=Homo sapiens OX=9606 GN=UBA2 PE=1 SV=2	7	4	71.2	327.3	273.5	1.8367	2.39283	1.30279	0.381599
High	Master Protein	P55060	Exportin-2 OS=Homo sapiens OX=9606 GN=CSE1L PE=1 SV=3	30	26	110.3	1163.8	972.7	6.53086	8.51006	1.30305	0.381896
High	Master Protein	Q9Y3B8	Oligoribonuclease, mitochondrial OS=Homo sapiens OX=9606 GN=REXO2 PE=1 SV=3	13	4	26.8	175.4	146.6	0.984287	1.28259	1.30306	0.381908
High	Master Protein	P62266	40S ribosomal protein S23 OS=Homo sapiens OX=9606 GN=RPS23 PE=1 SV=3	29	4	15.8	691.1	577.9	3.87823	5.05599	1.30369	0.382597
High	Master Protein	Q6DKI1	60S ribosomal protein L7-like 1 OS=Homo sapiens OX=9606 GN=RPL7L1 PE=1 SV=1	10	2	28.6	51.4	43	0.28844	0.376203	1.30427	0.38324
High	Master Protein	Q71U36	Tubulin alpha-1A chain OS=Homo sapiens OX=9606 GN=TUBA1A PE=1 SV=1	60	48	50.1	131	109.6	0.735129	0.95888	1.30437	0.383353
High	Master Protein	Q9Y5S9	RNA-binding protein 8A OS=Homo sapiens OX=9606 GN=RBM8A PE=1 SV=1	22	3	19.9	158.6	132.7	0.890011	1.16098	1.30446	0.383448
High	Master Protein	P39656	Dolichyl-diphosphooligosaccharide--protein glycosyltransferase 48 kDa subunit OS=Homo sapiens OX=9606 GN=DDOST PE=1 SV=4	14	6	50.8	326	273	1.82941	2.38845	1.30559	0.384701
High	Master Protein	P51149	Ras-related protein Rab-7a OS=Homo sapiens OX=9606 GN=RAB7A PE=1 SV=1	77	14	23.5	849.1	711.1	4.76487	6.22135	1.30567	0.38479
High	Master Protein	Q06124	Tyrosine-protein phosphatase non-receptor type 11 OS=Homo sapiens OX=9606 GN=PTPN11 PE=1 SV=2	13	7	68.4	228	191.1	1.27946	1.67192	1.30673	0.385966
High	Master Protein	P53618	Coatomer subunit beta OS=Homo sapiens OX=9606 GN=COPB1 PE=1 SV=3	26	20	107.1	1116.5	936	6.26543	8.18898	1.30701	0.386269
High	Master Protein	P60891	Ribose-phosphate pyrophosphokinase 1 OS=Homo sapiens OX=9606 GN=PRPS1 PE=1 SV=2	19	6	34.8	221.4	185.7	1.24242	1.62467	1.30766	0.386991
High	Master Protein	P35659	Protein DEK OS=Homo sapiens OX=9606 GN=DEK PE=1 SV=1	20	7	42.6	561.1	470.7	3.14871	4.11811	1.30787	0.387222
High	Master Protein	O75947	ATP synthase subunit d, mitochondrial OS=Homo sapiens OX=9606 GN=ATP5H PE=1 SV=3	17	3	18.5	176.3	147.9	0.989338	1.29396	1.30791	0.387262
High	Master Protein	P49721	Proteasome subunit beta type-2 OS=Homo sapiens OX=9606 GN=PSMB2 PE=1 SV=1	40	7	22.8	258.3	216.7	1.44949	1.89589	1.30796	0.387323
High	Master Protein	P15880	40S ribosomal protein S2 OS=Homo sapiens OX=9606 GN=RPS2 PE=1 SV=2	41	14	31.3	1048.1	880	5.88159	7.69904	1.30901	0.388471
High	Master Protein	Q14697	Neutral alpha-glucosidase AB OS=Homo sapiens OX=9606 GN=GANAB PE=1 SV=3	30	28	106.8	1964.4	1649.5	11.0236	14.4313	1.30913	0.388612
High	Master Protein	Q14980	Nuclear mitotic apparatus protein 1 OS=Homo sapiens OX=9606 GN=NUMA1 PE=1 SV=2	13	24	238.1	701.5	589.1	3.93659	5.15398	1.30925	0.388741
High	Master Protein	P07195	L-lactate dehydrogenase B chain OS=Homo sapiens OX=9606 GN=LDHB PE=1 SV=2	50	18	36.6	1352.9	1136.3	7.59203	9.94138	1.30945	0.388961
High	Master Protein	P01111	GTPase NRas OS=Homo sapiens OX=9606 GN=NRAS PE=1 SV=1	20	4	21.2	115.6	97.1	0.648709	0.849519	1.30955	0.389074
High	Master Protein	P49736	DNA replication licensing factor MCM2 OS=Homo sapiens OX=9606 GN=MCM2 PE=1 SV=4	7	6	101.8	353.9	297.3	1.98597	2.60105	1.30971	0.38925
High	Master Protein	O95202	Mitochondrial proton/calcium exchanger protein OS=Homo sapiens OX=9606 GN=LETM1 PE=1 SV=1	8	5	83.3	222.8	187.2	1.25028	1.6378	1.30994	0.389503
High	Master Protein	P52597	Heterogeneous nuclear ribonucleoprotein F OS=Homo sapiens OX=9606 GN=HNRNPF PE=1 SV=3	25	8	45.6	367.1	308.5	2.06004	2.69904	1.31018	0.389769
High	Master Protein	Q8N183	NADH dehydrogenase [ubiquinone] 1 alpha subcomplex assembly factor 2 OS=Homo sapiens OX=9606 GN=NDUFAF2 PE=1 SV=1	28	4	19.8	18.8	15.8	0.105499	0.138233	1.31027	0.389864
High	Master Protein	Q13347	Eukaryotic translation initiation factor 3 subunit I OS=Homo sapiens OX=9606 GN=EIF3I PE=1 SV=1	24	7	36.5	310.9	261.3	1.74467	2.28609	1.31033	0.389928
High	Master Protein	Q86W92	Liprin-beta-1 OS=Homo sapiens OX=9606 GN=PPFIBP1 PE=1 SV=2	4	3	114	85.9	72.2	0.482043	0.631671	1.3104	0.390013
High	Master Protein	P21399	Cytoplasmic aconitate hydratase OS=Homo sapiens OX=9606 GN=ACO1 PE=1 SV=3	13	11	98.3	436.6	367	2.45006	3.21085	1.31052	0.39014
High	Master Protein	P14618	Pyruvate kinase PKM OS=Homo sapiens OX=9606 GN=PKM PE=1 SV=4	67	63	57.9	3182.9	2677.8	17.8614	23.4278	1.31165	0.391378
High	Master Protein	P36871	Phosphoglucomutase-1 OS=Homo sapiens OX=9606 GN=PGM1 PE=1 SV=3	31	16	61.4	739.1	622	4.14759	5.44182	1.31204	0.391817
High	Master Protein	P42224	Signal transducer and activator of transcription 1-alpha/beta OS=Homo sapiens OX=9606 GN=STAT1 PE=1 SV=2	12	7	87.3	225.1	189.6	1.26319	1.65879	1.31318	0.393065
High	Master Protein	J3KQN4	60S ribosomal protein L36a OS=Homo sapiens OX=9606 GN=RPL36A PE=1 SV=1	19	4	16.4	517.2	435.9	2.90236	3.81365	1.31398	0.393947
High	Master Protein	Q96A72	Protein mago nashi homolog 2 OS=Homo sapiens OX=9606 GN=MAGOHB PE=1 SV=1	41	5	17.3	432	364.1	2.42424	3.18548	1.31401	0.393975
High	Master Protein	Q9Y512	Sorting and assembly machinery component 50 homolog OS=Homo sapiens OX=9606 GN=SAMM50 PE=1 SV=3	7	3	51.9	83.5	70.4	0.468575	0.615923	1.31446	0.394471
High	Master Protein	P33992	DNA replication licensing factor MCM5 OS=Homo sapiens OX=9606 GN=MCM5 PE=1 SV=5	3	2	82.2	30.6	25.8	0.171717	0.225722	1.3145	0.394511
High	Master Protein	Q16630	Cleavage and polyadenylation specificity factor subunit 6 OS=Homo sapiens OX=9606 GN=CPSF6 PE=1 SV=2	4	2	59.2	45.9	38.7	0.257576	0.338583	1.3145	0.394511
High	Master Protein	Q14008	Cytoskeleton-associated protein 5 OS=Homo sapiens OX=9606 GN=CKAP5 PE=1 SV=3	6	12	225.4	587.2	495.1	3.29517	4.33158	1.31452	0.39454
High	Master Protein	Q9BZD4	Kinetochore protein Nuf2 OS=Homo sapiens OX=9606 GN=NUF2 PE=1 SV=2	15	6	54.3	74.6	62.9	0.418631	0.550306	1.31454	0.394556
High	Master Protein	Q9BUP3	Oxidoreductase HTATIP2 OS=Homo sapiens OX=9606 GN=HTATIP2 PE=1 SV=2	12	3	27	187.6	158.2	1.05275	1.38408	1.31473	0.394762
High	Master Protein	P13674	Prolyl 4-hydroxylase subunit alpha-1 OS=Homo sapiens OX=9606 GN=P4HA1 PE=1 SV=2	30	14	61	397.5	335.3	2.23064	2.93351	1.3151	0.39517
High	Master Protein	Q9NQW6	Anillin OS=Homo sapiens OX=9606 GN=ANLN PE=1 SV=2	14	12	124.1	374.5	315.9	2.10157	2.76378	1.3151	0.395174
High	Master Protein	P50579	Methionine aminopeptidase 2 OS=Homo sapiens OX=9606 GN=METAP2 PE=1 SV=1	15	5	52.9	471.9	398.1	2.64815	3.48294	1.31524	0.395322
High	Master Protein	J3KR97	Tubulin-specific chaperone D OS=Homo sapiens OX=9606 GN=TBCD PE=1 SV=1	3	4	136.5	81.9	69.1	0.459596	0.604549	1.31539	0.395494
High	Master Protein	Q15382	GTP-binding protein Rheb OS=Homo sapiens OX=9606 GN=RHEB PE=1 SV=1	28	5	20.5	293.2	247.4	1.64534	2.16448	1.31552	0.395632
High	Master Protein	P42766	60S ribosomal protein L35 OS=Homo sapiens OX=9606 GN=RPL35 PE=1 SV=2	29	5	14.5	400.4	338.1	2.24691	2.95801	1.31647	0.39668
High	Master Protein	P09497	Clathrin light chain B OS=Homo sapiens OX=9606 GN=CLTB PE=1 SV=1	11	3	25.2	64.5	54.5	0.361953	0.476815	1.31734	0.397629
High	Master Protein	G3V3A4	SNW domain-containing protein 1 OS=Homo sapiens OX=9606 GN=SNW1 PE=1 SV=1	4	2	65.4	47.1	39.8	0.26431	0.348206	1.31742	0.397713
High	Master Protein	O43396	Thioredoxin-like protein 1 OS=Homo sapiens OX=9606 GN=TXNL1 PE=1 SV=3	25	5	32.2	286.6	242.4	1.60831	2.12073	1.31861	0.399023
High	Master Protein	P62851	40S ribosomal protein S25 OS=Homo sapiens OX=9606 GN=RPS25 PE=1 SV=1	30	5	13.7	246.8	208.8	1.38496	1.82677	1.31901	0.399451
High	Master Protein	O15427	Monocarboxylate transporter 4 OS=Homo sapiens OX=9606 GN=SLC16A3 PE=1 SV=1	10	5	49.4	675	571.1	3.78788	4.9965	1.31908	0.399528
High	Master Protein	Q14157	Ubiquitin-associated protein 2-like OS=Homo sapiens OX=9606 GN=UBAP2L PE=1 SV=2	11	8	114.5	134	113.4	0.751964	0.992126	1.31938	0.39986
High	Master Protein	P10809	60 kDa heat shock protein, mitochondrial OS=Homo sapiens OX=9606 GN=HSPD1 PE=1 SV=2	60	33	61	2475.2	2095.5	13.89	18.3333	1.31989	0.400421
High	Master Protein	A0A0C4DG17	40S ribosomal protein SA OS=Homo sapiens OX=9606 GN=RPSA PE=1 SV=1	49	11	33.3	328	277.7	1.84063	2.42957	1.31997	0.400503
High	Master Protein	Q9UNS2	COP9 signalosome complex subunit 3 OS=Homo sapiens OX=9606 GN=COPS3 PE=1 SV=3	10	3	47.8	99.4	84.2	0.5578	0.736658	1.32065	0.401246
High	Master Protein	P27635	60S ribosomal protein L10 OS=Homo sapiens OX=9606 GN=RPL10 PE=1 SV=4	33	6	24.6	305.2	258.6	1.71268	2.26247	1.32101	0.401639
High	Master Protein	Q9UII2	ATPase inhibitor, mitochondrial OS=Homo sapiens OX=9606 GN=ATPIF1 PE=1 SV=1	24	3	12.2	119.6	101.4	0.671156	0.887139	1.32181	0.402512
High	Master Protein	P12955	Xaa-Pro dipeptidase OS=Homo sapiens OX=9606 GN=PEPD PE=1 SV=3	14	7	54.5	304	257.8	1.70595	2.25547	1.32212	0.402853
High	Master Protein	P14678	Small nuclear ribonucleoprotein-associated proteins B and B' OS=Homo sapiens OX=9606 GN=SNRPB PE=1 SV=2	22	6	24.6	411.8	349.3	2.31089	3.05599	1.32243	0.403195
High	Master Protein	Q14677	Clathrin interactor 1 OS=Homo sapiens OX=9606 GN=CLINT1 PE=1 SV=1	4	2	68.2	54.7	46.4	0.306958	0.405949	1.32249	0.403256
High	Master Protein	P51452	Dual specificity protein phosphatase 3 OS=Homo sapiens OX=9606 GN=DUSP3 PE=1 SV=1	22	3	20.5	96.9	82.2	0.543771	0.71916	1.32254	0.403314
High	Master Protein	Q92499	ATP-dependent RNA helicase DDX1 OS=Homo sapiens OX=9606 GN=DDX1 PE=1 SV=2	17	11	82.4	515.7	437.5	2.89394	3.82765	1.32264	0.403423
High	Master Protein	P78318	Immunoglobulin-binding protein 1 OS=Homo sapiens OX=9606 GN=IGBP1 PE=1 SV=1	13	3	39.2	29.7	25.2	0.166667	0.220472	1.32283	0.403633
High	Master Protein	Q86YP4	Transcriptional repressor p66-alpha OS=Homo sapiens OX=9606 GN=GATAD2A PE=1 SV=1	4	2	68	15.2	12.9	0.0852974	0.112861	1.32315	0.403972
High	Master Protein	P35579	Myosin-9 OS=Homo sapiens OX=9606 GN=MYH9 PE=1 SV=4	53	137	226.4	9080.8	7707.4	50.9585	67.4313	1.32326	0.404097
High	Master Protein	H7C2Q8	EBNA1 binding protein 2, isoform CRA_d OS=Homo sapiens OX=9606 GN=EBNA1BP2 PE=1 SV=1	16	4	40.7	256.2	217.5	1.43771	1.90289	1.32355	0.404417
High	Master Protein	P46013	Proliferation marker protein Ki-67 OS=Homo sapiens OX=9606 GN=MKI67 PE=1 SV=2	8	18	358.5	911.7	774.5	5.11616	6.77603	1.32444	0.405378
High	Master Protein	P11940	Polyadenylate-binding protein 1 OS=Homo sapiens OX=9606 GN=PABPC1 PE=1 SV=2	28	17	70.6	943.3	801.4	5.29349	7.01137	1.32453	0.405478
High	Master Protein	Q99497	Protein/nucleic acid deglycase DJ-1 OS=Homo sapiens OX=9606 GN=PARK7 PE=1 SV=2	46	10	19.9	793.9	674.5	4.45511	5.90114	1.32458	0.405533
High	Master Protein	O75348	V-type proton ATPase subunit G 1 OS=Homo sapiens OX=9606 GN=ATP6V1G1 PE=1 SV=3	21	2	13.7	31.3	26.6	0.175645	0.232721	1.32495	0.405936
High	Master Protein	P30566	Adenylosuccinate lyase OS=Homo sapiens OX=9606 GN=ADSL PE=1 SV=2	13	5	54.9	207.9	176.7	1.16667	1.54593	1.32508	0.406084
High	Master Protein	P30084	Enoyl-CoA hydratase, mitochondrial OS=Homo sapiens OX=9606 GN=ECHS1 PE=1 SV=4	17	5	31.4	213.6	181.6	1.19865	1.5888	1.32549	0.406524
High	Master Protein	Q8NBJ5	Procollagen galactosyltransferase 1 OS=Homo sapiens OX=9606 GN=COLGALT1 PE=1 SV=1	19	13	71.6	498.9	424.5	2.79966	3.71391	1.32656	0.407686
High	Master Protein	Q16539	Mitogen-activated protein kinase 14 OS=Homo sapiens OX=9606 GN=MAPK14 PE=1 SV=3	16	4	41.3	164.5	140	0.92312	1.22485	1.32686	0.408011
High	Master Protein	P48147	Prolyl endopeptidase OS=Homo sapiens OX=9606 GN=PREP PE=1 SV=2	18	11	80.6	601	511.5	3.37262	4.47507	1.32688	0.408041
High	Master Protein	P13804	Electron transfer flavoprotein subunit alpha, mitochondrial OS=Homo sapiens OX=9606 GN=ETFA PE=1 SV=1	25	8	35.1	366	311.5	2.05387	2.72528	1.3269	0.40806
High	Master Protein	P10515	Dihydrolipoyllysine-residue acetyltransferase component of pyruvate dehydrogenase complex, mitochondrial OS=Homo sapiens OX=9606 GN=DLAT PE=1 SV=3	3	2	69	104.1	88.6	0.584175	0.775153	1.32692	0.40808
High	Master Protein	Q16531	DNA damage-binding protein 1 OS=Homo sapiens OX=9606 GN=DDB1 PE=1 SV=1	17	19	126.9	1029.5	876.3	5.77722	7.66667	1.32705	0.408225
High	Master Protein	P61009	Signal peptidase complex subunit 3 OS=Homo sapiens OX=9606 GN=SPCS3 PE=1 SV=1	12	2	20.3	82.9	70.6	0.465208	0.617673	1.32774	0.408968
High	Master Protein	Q9H2J4	Phosducin-like protein 3 OS=Homo sapiens OX=9606 GN=PDCL3 PE=1 SV=1	21	4	27.6	71.7	61.1	0.402357	0.534558	1.32857	0.409871
High	Master Protein	Q13190	Syntaxin-5 OS=Homo sapiens OX=9606 GN=STX5 PE=1 SV=2	8	2	39.6	31.8	27.1	0.178451	0.237095	1.32863	0.409938
High	Master Protein	O95758	Polypyrimidine tract-binding protein 3 OS=Homo sapiens OX=9606 GN=PTBP3 PE=1 SV=2	5	3	59.7	56.2	47.9	0.315376	0.419073	1.3288	0.410127
High	Master Protein	J3KTA4	Probable ATP-dependent RNA helicase DDX5 OS=Homo sapiens OX=9606 GN=DDX5 PE=1 SV=1	38	23	69	1323.8	1128.8	7.42873	9.87577	1.3294	0.410777
High	Master Protein	D6RF35	Vitamin D-binding protein OS=Homo sapiens OX=9606 GN=GC PE=1 SV=1	6	2	53	30.6	26.1	0.171717	0.228346	1.32978	0.41119
High	Master Protein	P29317	Ephrin type-A receptor 2 OS=Homo sapiens OX=9606 GN=EPHA2 PE=1 SV=2	12	9	108.2	112.3	95.8	0.630191	0.838145	1.32999	0.411412
High	Master Protein	E7EX17	Eukaryotic translation initiation factor 4B OS=Homo sapiens OX=9606 GN=EIF4B PE=1 SV=1	13	7	69.7	200.2	170.8	1.12346	1.49431	1.3301	0.411538
High	Master Protein	Q9UMX5	Neudesin OS=Homo sapiens OX=9606 GN=NENF PE=1 SV=1	38	5	18.8	100.1	85.4	0.561728	0.747157	1.3301	0.411538
High	Master Protein	P09758	Tumor-associated calcium signal transducer 2 OS=Homo sapiens OX=9606 GN=TACSTD2 PE=1 SV=3	10	2	35.7	30	25.6	0.16835	0.223972	1.33039	0.411853
High	Master Protein	P60174	Triosephosphate isomerase OS=Homo sapiens OX=9606 GN=TPI1 PE=1 SV=3	71	16	30.8	944.9	806.5	5.30247	7.05599	1.3307	0.412185
High	Master Protein	O95810	Caveolae-associated protein 2 OS=Homo sapiens OX=9606 GN=CAVIN2 PE=1 SV=3	8	3	47.1	49.9	42.6	0.280022	0.372703	1.33098	0.412486
High	Master Protein	Q9NTX5	Ethylmalonyl-CoA decarboxylase OS=Homo sapiens OX=9606 GN=ECHDC1 PE=1 SV=2	26	7	33.7	193.5	165.2	1.08586	1.44532	1.33104	0.412552
High	Master Protein	P25398	40S ribosomal protein S12 OS=Homo sapiens OX=9606 GN=RPS12 PE=1 SV=3	53	7	14.5	493	421.2	2.76655	3.68504	1.332	0.41359
High	Master Protein	P62136	Serine/threonine-protein phosphatase PP1-alpha catalytic subunit OS=Homo sapiens OX=9606 GN=PPP1CA PE=1 SV=1	34	11	37.5	571.5	488.3	3.20707	4.27209	1.33209	0.413686
High	Master Protein	O75533	Splicing factor 3B subunit 1 OS=Homo sapiens OX=9606 GN=SF3B1 PE=1 SV=3	15	14	145.7	784.1	670	4.40011	5.86177	1.33219	0.413795
High	Master Protein	Q14152	Eukaryotic translation initiation factor 3 subunit A OS=Homo sapiens OX=9606 GN=EIF3A PE=1 SV=1	18	28	166.5	1292.4	1104.7	7.25253	9.66492	1.33263	0.414274
High	Master Protein	P12268	Inosine-5'-monophosphate dehydrogenase 2 OS=Homo sapiens OX=9606 GN=IMPDH2 PE=1 SV=2	34	15	55.8	830.2	709.8	4.65881	6.20997	1.33295	0.414626
High	Master Protein	P13667	Protein disulfide-isomerase A4 OS=Homo sapiens OX=9606 GN=PDIA4 PE=1 SV=2	45	33	72.9	2606.2	2228.6	14.6251	19.4978	1.33317	0.414862
High	Master Protein	Q9BU23	Lipase maturation factor 2 OS=Homo sapiens OX=9606 GN=LMF2 PE=1 SV=2	4	2	79.6	60.8	52	0.34119	0.454943	1.3334	0.415112
High	Master Protein	O75694	Nuclear pore complex protein Nup155 OS=Homo sapiens OX=9606 GN=NUP155 PE=1 SV=1	5	6	155.1	147.9	126.5	0.829966	1.10674	1.33347	0.415187
High	Master Protein	P84085	ADP-ribosylation factor 5 OS=Homo sapiens OX=9606 GN=ARF5 PE=1 SV=2	17	5	20.5	33.3	28.5	0.186869	0.249344	1.33433	0.416112
High	Master Protein	H3BQK9	Microtubule-actin cross-linking factor 1, isoforms 1/2/3/5 OS=Homo sapiens OX=9606 GN=MACF1 PE=1 SV=1	1	8	860.5	64.6	55.3	0.362514	0.483815	1.33461	0.416417
High	Master Protein	P05455	Lupus La protein OS=Homo sapiens OX=9606 GN=SSB PE=1 SV=2	33	14	46.8	997.7	854.1	5.59877	7.47244	1.33466	0.416471
High	Master Protein	P62937	Peptidyl-prolyl cis-trans isomerase A OS=Homo sapiens OX=9606 GN=PPIA PE=1 SV=2	59	17	18	1024.4	877.4	5.7486	7.67629	1.33533	0.417199
High	Master Protein	Q9BPX5	Actin-related protein 2/3 complex subunit 5-like protein OS=Homo sapiens OX=9606 GN=ARPC5L PE=1 SV=1	29	3	16.9	72.5	62.1	0.406846	0.543307	1.33541	0.417284
High	Master Protein	Q9Y3F4	Serine-threonine kinase receptor-associated protein OS=Homo sapiens OX=9606 GN=STRAP PE=1 SV=1	21	6	38.4	248.3	212.7	1.39338	1.86089	1.33553	0.417408
High	Master Protein	Q14847	LIM and SH3 domain protein 1 OS=Homo sapiens OX=9606 GN=LASP1 PE=1 SV=2	55	15	29.7	1217.8	1043.7	6.83389	9.13123	1.33617	0.418102
High	Master Protein	Q5JTH9	RRP12-like protein OS=Homo sapiens OX=9606 GN=RRP12 PE=1 SV=2	3	3	143.6	89.2	76.5	0.500561	0.669291	1.33708	0.419088
High	Master Protein	P00558	Phosphoglycerate kinase 1 OS=Homo sapiens OX=9606 GN=PGK1 PE=1 SV=3	69	37	44.6	3772.2	3235.7	21.1684	28.3088	1.33732	0.419344
High	Master Protein	E5RJD8	Tubulin-specific chaperone A OS=Homo sapiens OX=9606 GN=TBCA PE=1 SV=1	47	6	14.3	465.8	399.9	2.61392	3.49869	1.33848	0.420601
High	Master Protein	O00194	Ras-related protein Rab-27B OS=Homo sapiens OX=9606 GN=RAB27B PE=1 SV=4	13	2	24.6	19.8	17	0.111111	0.148731	1.33858	0.420706
High	Master Protein	H7BZJ3	Protein disulfide-isomerase A3 (Fragment) OS=Homo sapiens OX=9606 GN=PDIA3 PE=1 SV=1	48	5	13.5	58	49.8	0.325477	0.435696	1.33864	0.420765
High	Master Protein	Q8N1G4	Leucine-rich repeat-containing protein 47 OS=Homo sapiens OX=9606 GN=LRRC47 PE=1 SV=1	14	6	63.4	126	108.2	0.707071	0.946632	1.33881	0.420949
High	Master Protein	Q9HDC9	Adipocyte plasma membrane-associated protein OS=Homo sapiens OX=9606 GN=APMAP PE=1 SV=2	19	8	46.5	408.5	350.8	2.29237	3.06912	1.33884	0.420985
High	Master Protein	Q9GZZ1	N-alpha-acetyltransferase 50 OS=Homo sapiens OX=9606 GN=NAA50 PE=1 SV=1	12	2	19.4	114.1	98	0.640292	0.857393	1.33907	0.421227
High	Master Protein	O14929	Histone acetyltransferase type B catalytic subunit OS=Homo sapiens OX=9606 GN=HAT1 PE=1 SV=1	8	3	49.5	27	23.2	0.151515	0.202975	1.33963	0.421837
High	Master Protein	A0A0G2JIW1	Heat shock 70 kDa protein 1B OS=Homo sapiens OX=9606 GN=HSPA1B PE=1 SV=1	58	32	70.1	1499	1288.3	8.4119	11.2712	1.33991	0.42214
High	Master Protein	P68104	Elongation factor 1-alpha 1 OS=Homo sapiens OX=9606 GN=EEF1A1 PE=1 SV=1	66	42	50.1	3354.2	2884.3	18.8227	25.2345	1.34064	0.422924
High	Master Protein	P53701	Cytochrome c-type heme lyase OS=Homo sapiens OX=9606 GN=HCCS PE=1 SV=1	12	3	30.6	86.4	74.3	0.484848	0.650044	1.34072	0.423003
High	Master Protein	Q96G23	Ceramide synthase 2 OS=Homo sapiens OX=9606 GN=CERS2 PE=1 SV=1	7	2	44.8	130	111.8	0.729517	0.978128	1.34079	0.42308
High	Master Protein	E9PK25	Cofilin-1 OS=Homo sapiens OX=9606 GN=CFL1 PE=1 SV=1	57	13	22.7	1284.9	1105.4	7.21044	9.67104	1.34126	0.423584
High	Master Protein	F6WQW2	Ran-specific GTPase-activating protein OS=Homo sapiens OX=9606 GN=RANBP1 PE=1 SV=1	23	5	31.9	355.3	305.9	1.99383	2.67629	1.34229	0.424694
High	Master Protein	O14828	Secretory carrier-associated membrane protein 3 OS=Homo sapiens OX=9606 GN=SCAMP3 PE=1 SV=3	11	3	38.3	81.3	70	0.456229	0.612423	1.34236	0.424772
High	Master Protein	O75531	Barrier-to-autointegration factor OS=Homo sapiens OX=9606 GN=BANF1 PE=1 SV=1	44	3	10.1	124.5	107.2	0.698653	0.937883	1.34242	0.424831
High	Master Protein	P04083	Annexin A1 OS=Homo sapiens OX=9606 GN=ANXA1 PE=1 SV=2	61	18	38.7	1422.3	1225.8	7.98148	10.7244	1.34366	0.42617
High	Master Protein	A0A0U1RQK7	Eukaryotic translation initiation factor 4 gamma 3 OS=Homo sapiens OX=9606 GN=EIF4G3 PE=1 SV=1	1	2	195.2	19.6	16.9	0.109989	0.147857	1.34429	0.426842
High	Master Protein	P33316	Deoxyuridine 5'-triphosphate nucleotidohydrolase, mitochondrial OS=Homo sapiens OX=9606 GN=DUT PE=1 SV=4	17	3	26.5	151.3	130.5	0.849046	1.14173	1.34472	0.42731
High	Master Protein	P61769	Beta-2-microglobulin OS=Homo sapiens OX=9606 GN=B2M PE=1 SV=1	14	2	13.7	10.2	8.8	0.0572391	0.0769904	1.34507	0.427678
High	Master Protein	F8WAR4	MICOS complex subunit OS=Homo sapiens OX=9606 GN=CHCHD3 PE=1 SV=1	21	5	27.7	279.8	241.5	1.57015	2.11286	1.34565	0.428299
High	Master Protein	Q9Y223	Bifunctional UDP-N-acetylglucosamine 2-epimerase/N-acetylmannosamine kinase OS=Homo sapiens OX=9606 GN=GNE PE=1 SV=1	3	2	79.2	119.2	102.9	0.668911	0.900262	1.34586	0.428531
High	Master Protein	B1AK88	Capping protein (Actin filament) muscle Z-line, beta, isoform CRA_d OS=Homo sapiens OX=9606 GN=CAPZB PE=1 SV=1	46	14	33.8	702.6	606.7	3.94276	5.30796	1.34625	0.428952
High	Master Protein	Q12996	Cleavage stimulation factor subunit 3 OS=Homo sapiens OX=9606 GN=CSTF3 PE=1 SV=1	7	5	82.9	297.5	256.9	1.66947	2.24759	1.34629	0.428989
High	Master Protein	P25325	3-mercaptopyruvate sulfurtransferase OS=Homo sapiens OX=9606 GN=MPST PE=1 SV=3	14	4	33.2	221.5	191.3	1.24299	1.67367	1.34649	0.429202
High	Master Protein	Q12972	Nuclear inhibitor of protein phosphatase 1 OS=Homo sapiens OX=9606 GN=PPP1R8 PE=1 SV=2	17	3	38.5	71.2	61.5	0.399551	0.538058	1.34666	0.429381
High	Master Protein	Q86V48	Leucine zipper protein 1 OS=Homo sapiens OX=9606 GN=LUZP1 PE=1 SV=2	3	2	120.2	25.7	22.2	0.14422	0.194226	1.34673	0.429463
High	Master Protein	P12004	Proliferating cell nuclear antigen OS=Homo sapiens OX=9606 GN=PCNA PE=1 SV=1	40	11	28.8	1123.5	970.6	6.30471	8.49169	1.34688	0.429621
High	Master Protein	P35241	Radixin OS=Homo sapiens OX=9606 GN=RDX PE=1 SV=1	32	22	68.5	278.2	240.4	1.56117	2.10324	1.34722	0.429986
High	Master Protein	O00303	Eukaryotic translation initiation factor 3 subunit F OS=Homo sapiens OX=9606 GN=EIF3F PE=1 SV=1	17	5	37.5	243.6	210.6	1.367	1.84252	1.34785	0.430663
High	Master Protein	P36405	ADP-ribosylation factor-like protein 3 OS=Homo sapiens OX=9606 GN=ARL3 PE=1 SV=2	34	5	20.4	277.6	240.1	1.5578	2.10061	1.34845	0.4313
High	Master Protein	Q9BT09	Protein canopy homolog 3 OS=Homo sapiens OX=9606 GN=CNPY3 PE=1 SV=1	9	2	30.7	22.3	19.3	0.12514	0.168854	1.34932	0.432229
High	Master Protein	P26639	Threonine--tRNA ligase, cytoplasmic OS=Homo sapiens OX=9606 GN=TARS PE=1 SV=3	37	25	83.4	1698.5	1470.3	9.53143	12.8635	1.34959	0.432521
High	Master Protein	Q9NYF8	Bcl-2-associated transcription factor 1 OS=Homo sapiens OX=9606 GN=BCLAF1 PE=1 SV=2	4	4	106.1	102.9	89.1	0.577441	0.779528	1.34997	0.432926
High	Master Protein	P53611	Geranylgeranyl transferase type-2 subunit beta OS=Homo sapiens OX=9606 GN=RABGGTB PE=1 SV=2	8	3	36.9	94.9	82.2	0.532548	0.71916	1.35041	0.433402
High	Master Protein	Q9UQ35	Serine/arginine repetitive matrix protein 2 OS=Homo sapiens OX=9606 GN=SRRM2 PE=1 SV=2	4	8	299.4	95.2	82.5	0.534231	0.721785	1.35107	0.434104
High	Master Protein	O15020	Spectrin beta chain, non-erythrocytic 2 OS=Homo sapiens OX=9606 GN=SPTBN2 PE=1 SV=3	2	6	271.2	60.2	52.2	0.337823	0.456693	1.35187	0.434958
High	Master Protein	O14936	Peripheral plasma membrane protein CASK OS=Homo sapiens OX=9606 GN=CASK PE=1 SV=3	2	2	105.1	10.6	9.2	0.0594837	0.0804899	1.35314	0.436313
High	Master Protein	O15347	High mobility group protein B3 OS=Homo sapiens OX=9606 GN=HMGB3 PE=1 SV=4	23	5	23	495.3	429.9	2.77946	3.76115	1.3532	0.43637
High	Master Protein	Q86UE4	Protein LYRIC OS=Homo sapiens OX=9606 GN=MTDH PE=1 SV=2	20	8	63.8	207.3	180	1.1633	1.5748	1.35374	0.436949
High	Master Protein	Q96C86	m7GpppX diphosphatase OS=Homo sapiens OX=9606 GN=DCPS PE=1 SV=2	12	3	38.6	125.5	109	0.704265	0.953631	1.35408	0.437313
High	Master Protein	Q9NRN7	L-aminoadipate-semialdehyde dehydrogenase-phosphopantetheinyl transferase OS=Homo sapiens OX=9606 GN=AASDHPPT PE=1 SV=2	11	3	35.8	98.3	85.4	0.551627	0.747157	1.35446	0.437717
High	Master Protein	P38117	Electron transfer flavoprotein subunit beta OS=Homo sapiens OX=9606 GN=ETFB PE=1 SV=3	33	8	27.8	654	568.4	3.67003	4.97288	1.355	0.438288
High	Master Protein	Q15424	Scaffold attachment factor B1 OS=Homo sapiens OX=9606 GN=SAFB PE=1 SV=4	15	14	102.6	515	448	2.89001	3.91951	1.35623	0.439598
High	Master Protein	P22059	Oxysterol-binding protein 1 OS=Homo sapiens OX=9606 GN=OSBP PE=1 SV=1	8	4	89.4	71.5	62.2	0.401235	0.544182	1.35627	0.439643
High	Master Protein	Q13185	Chromobox protein homolog 3 OS=Homo sapiens OX=9606 GN=CBX3 PE=1 SV=4	26	4	20.8	360.8	314.2	2.02469	2.74891	1.35769	0.441156
High	Master Protein	O75534	Cold shock domain-containing protein E1 OS=Homo sapiens OX=9606 GN=CSDE1 PE=1 SV=2	10	6	88.8	96.9	84.4	0.543771	0.738408	1.35794	0.441418
High	Master Protein	P61247	40S ribosomal protein S3a OS=Homo sapiens OX=9606 GN=RPS3A PE=1 SV=2	29	8	29.9	662.8	577.3	3.71942	5.05074	1.35794	0.44142
High	Master Protein	Q9Y2X3	Nucleolar protein 58 OS=Homo sapiens OX=9606 GN=NOP58 PE=1 SV=1	19	8	59.5	353.1	307.7	1.98148	2.69204	1.3586	0.44212
High	Master Protein	P55327	Tumor protein D52 OS=Homo sapiens OX=9606 GN=TPD52 PE=1 SV=2	38	4	24.3	28.8	25.1	0.161616	0.219598	1.35876	0.44229
High	Master Protein	Q9BZE4	Nucleolar GTP-binding protein 1 OS=Homo sapiens OX=9606 GN=GTPBP4 PE=1 SV=3	11	6	73.9	159.1	138.7	0.892817	1.21347	1.35915	0.442706
High	Master Protein	Q9H3N1	Thioredoxin-related transmembrane protein 1 OS=Homo sapiens OX=9606 GN=TMX1 PE=1 SV=1	23	7	31.8	367.5	320.4	2.06229	2.80315	1.35924	0.442802
High	Master Protein	Q9Y6W5	Wiskott-Aldrich syndrome protein family member 2 OS=Homo sapiens OX=9606 GN=WASF2 PE=1 SV=3	4	2	54.3	84.4	73.6	0.473625	0.64392	1.35956	0.443135
High	Master Protein	A0A0B4J2C3	Translationally-controlled tumor protein OS=Homo sapiens OX=9606 GN=TPT1 PE=1 SV=1	43	8	22.6	882.9	770	4.95455	6.73666	1.35969	0.44328
High	Master Protein	J3KQE5	GTP-binding nuclear protein Ran (Fragment) OS=Homo sapiens OX=9606 GN=RAN PE=1 SV=1	33	6	26.8	576.7	503	3.23625	4.4007	1.35981	0.443409
High	Master Protein	Q9H223	EH domain-containing protein 4 OS=Homo sapiens OX=9606 GN=EHD4 PE=1 SV=1	12	6	61.1	186.9	163.1	1.04882	1.42695	1.36052	0.444162
High	Master Protein	P61201	COP9 signalosome complex subunit 2 OS=Homo sapiens OX=9606 GN=COPS2 PE=1 SV=1	11	5	51.6	252.9	220.7	1.41919	1.93088	1.36055	0.444192
High	Master Protein	A5YKK6	CCR4-NOT transcription complex subunit 1 OS=Homo sapiens OX=9606 GN=CNOT1 PE=1 SV=2	1	2	266.8	45.6	39.8	0.255892	0.348206	1.36075	0.444407
High	Master Protein	P24752	Acetyl-CoA acetyltransferase, mitochondrial OS=Homo sapiens OX=9606 GN=ACAT1 PE=1 SV=1	39	13	45.2	516.1	450.5	2.89618	3.94138	1.36089	0.444548
High	Master Protein	Q16706	Alpha-mannosidase 2 OS=Homo sapiens OX=9606 GN=MAN2A1 PE=1 SV=2	2	2	131.1	55.2	48.2	0.309764	0.421697	1.36135	0.445037
High	Master Protein	Q9Y281	Cofilin-2 OS=Homo sapiens OX=9606 GN=CFL2 PE=1 SV=1	36	6	18.7	146.7	128.2	0.823232	1.12161	1.36245	0.446199
High	Master Protein	Q9NX58	Cell growth-regulating nucleolar protein OS=Homo sapiens OX=9606 GN=LYAR PE=1 SV=2	7	2	43.6	18.3	16	0.102694	0.139983	1.36311	0.4469
High	Master Protein	O15498	Synaptobrevin homolog YKT6 OS=Homo sapiens OX=9606 GN=YKT6 PE=1 SV=1	9	2	22.4	91.7	80.2	0.51459	0.701662	1.36354	0.447352
High	Master Protein	P60953	Cell division control protein 42 homolog OS=Homo sapiens OX=9606 GN=CDC42 PE=1 SV=2	43	7	21.2	582.5	509.5	3.2688	4.45757	1.36367	0.447496
High	Master Protein	Q9UHV9	Prefoldin subunit 2 OS=Homo sapiens OX=9606 GN=PFDN2 PE=1 SV=1	17	2	16.6	88.7	77.6	0.497755	0.678915	1.36395	0.447794
High	Master Protein	P53004	Biliverdin reductase A OS=Homo sapiens OX=9606 GN=BLVRA PE=1 SV=2	30	8	33.4	161.6	141.4	0.906846	1.2371	1.36417	0.448027
High	Master Protein	P63244	Receptor of activated protein C kinase 1 OS=Homo sapiens OX=9606 GN=RACK1 PE=1 SV=3	55	18	35.1	1022.1	894.4	5.73569	7.82502	1.36427	0.448128
High	Master Protein	J3KP58	CAP-Gly domain-containing linker protein 1 OS=Homo sapiens OX=9606 GN=CLIP1 PE=1 SV=2	2	3	148	52.1	45.6	0.292368	0.39895	1.36455	0.448422
High	Master Protein	A0A1W2PPZ5	Transcription elongation factor A protein 1 OS=Homo sapiens OX=9606 GN=TCEA1 PE=1 SV=1	11	3	33.9	37.7	33	0.21156	0.288714	1.36469	0.448573
High	Master Protein	P37235	Hippocalcin-like protein 1 OS=Homo sapiens OX=9606 GN=HPCAL1 PE=1 SV=3	25	5	22.3	287.4	251.6	1.61279	2.20122	1.36485	0.448744
High	Master Protein	O00483	Cytochrome c oxidase subunit NDUFA4 OS=Homo sapiens OX=9606 GN=NDUFA4 PE=1 SV=1	22	2	9.4	121.4	106.3	0.681257	0.930009	1.36514	0.449045
High	Master Protein	P31937	3-hydroxyisobutyrate dehydrogenase, mitochondrial OS=Homo sapiens OX=9606 GN=HIBADH PE=1 SV=2	13	3	35.3	71.6	62.7	0.401796	0.548556	1.36526	0.449178
High	Master Protein	Q9NRV9	Heme-binding protein 1 OS=Homo sapiens OX=9606 GN=HEBP1 PE=1 SV=1	33	6	21.1	382.2	334.7	2.14478	2.92826	1.36529	0.449213
High	Master Protein	Q8NF37	Lysophosphatidylcholine acyltransferase 1 OS=Homo sapiens OX=9606 GN=LPCAT1 PE=1 SV=2	10	5	59.1	405.8	355.4	2.27722	3.10936	1.36542	0.449347
High	Master Protein	Q9BWF3	RNA-binding protein 4 OS=Homo sapiens OX=9606 GN=RBM4 PE=1 SV=1	9	4	40.3	170.4	149.3	0.956229	1.30621	1.366	0.449961
High	Master Protein	P62993	Growth factor receptor-bound protein 2 OS=Homo sapiens OX=9606 GN=GRB2 PE=1 SV=1	20	4	25.2	172.2	150.9	0.96633	1.32021	1.36621	0.45018
High	Master Protein	Q9UHB6	LIM domain and actin-binding protein 1 OS=Homo sapiens OX=9606 GN=LIMA1 PE=1 SV=1	17	11	85.2	246.3	215.9	1.38215	1.88889	1.36663	0.450619
High	Master Protein	P09622	Dihydrolipoyl dehydrogenase, mitochondrial OS=Homo sapiens OX=9606 GN=DLD PE=1 SV=2	20	9	54.1	459.8	403.1	2.58025	3.52668	1.3668	0.450803
High	Master Protein	Q9NQG5	Regulation of nuclear pre-mRNA domain-containing protein 1B OS=Homo sapiens OX=9606 GN=RPRD1B PE=1 SV=1	13	3	36.9	101.4	88.9	0.569024	0.777778	1.36686	0.45087
High	Master Protein	P13639	Elongation factor 2 OS=Homo sapiens OX=9606 GN=EEF2 PE=1 SV=4	52	40	95.3	2519.3	2209.1	14.1375	19.3272	1.36709	0.451108
High	Master Protein	P05023	Sodium/potassium-transporting ATPase subunit alpha-1 OS=Homo sapiens OX=9606 GN=ATP1A1 PE=1 SV=1	33	30	112.8	1437.5	1261.2	8.06678	11.0341	1.36785	0.451907
High	Master Protein	P18669	Phosphoglycerate mutase 1 OS=Homo sapiens OX=9606 GN=PGAM1 PE=1 SV=2	58	15	28.8	779.1	683.6	4.37205	5.98075	1.36795	0.452016
High	Master Protein	P62495	Eukaryotic peptide chain release factor subunit 1 OS=Homo sapiens OX=9606 GN=ETF1 PE=1 SV=3	19	9	49	461.3	404.8	2.58866	3.54156	1.3681	0.452176
High	Master Protein	Q6IN85	Serine/threonine-protein phosphatase 4 regulatory subunit 3A OS=Homo sapiens OX=9606 GN=PPP4R3A PE=1 SV=1	2	2	95.3	61.5	54	0.345118	0.472441	1.36893	0.453045
High	Master Protein	P11908	Ribose-phosphate pyrophosphokinase 2 OS=Homo sapiens OX=9606 GN=PRPS2 PE=1 SV=2	27	7	34.7	287.4	252.4	1.61279	2.20822	1.36919	0.453324
High	Master Protein	A0A087X1N8	Serpin B6 OS=Homo sapiens OX=9606 GN=SERPINB6 PE=1 SV=1	26	9	44.8	654.5	575	3.67284	5.03062	1.36968	0.453841
High	Master Protein	Q9Y639	Neuroplastin OS=Homo sapiens OX=9606 GN=NPTN PE=1 SV=2	9	3	44.4	181.8	159.8	1.0202	1.39808	1.37039	0.454587
High	Master Protein	Q9Y4E8	Ubiquitin carboxyl-terminal hydrolase 15 OS=Homo sapiens OX=9606 GN=USP15 PE=1 SV=3	2	2	112.3	21.6	19	0.121212	0.166229	1.37139	0.45564
High	Master Protein	O00267	Transcription elongation factor SPT5 OS=Homo sapiens OX=9606 GN=SUPT5H PE=1 SV=1	4	3	120.9	80.6	70.9	0.452301	0.620297	1.37143	0.455678
High	Master Protein	D3DQV9	Eukaryotic translation initiation factor 4 gamma 2 (Fragment) OS=Homo sapiens OX=9606 GN=EIF4G2 PE=1 SV=1	15	14	102.3	636.1	559.6	3.56958	4.89589	1.37156	0.455814
High	Master Protein	P33176	Kinesin-1 heavy chain OS=Homo sapiens OX=9606 GN=KIF5B PE=1 SV=1	22	19	109.6	801.4	705.1	4.49719	6.16885	1.37171	0.455977
High	Master Protein	P46977	Dolichyl-diphosphooligosaccharide--protein glycosyltransferase subunit STT3A OS=Homo sapiens OX=9606 GN=STT3A PE=1 SV=2	7	5	80.5	422	371.3	2.36813	3.24847	1.37175	0.456014
High	Master Protein	Q15942	Zyxin OS=Homo sapiens OX=9606 GN=ZYX PE=1 SV=1	20	8	61.2	285.7	251.4	1.60325	2.19948	1.37188	0.456156
High	Master Protein	P30520	Adenylosuccinate synthetase isozyme 2 OS=Homo sapiens OX=9606 GN=ADSS PE=1 SV=3	14	5	50.1	152.9	134.6	0.858025	1.1776	1.37246	0.456762
High	Master Protein	Q9NQR4	Omega-amidase NIT2 OS=Homo sapiens OX=9606 GN=NIT2 PE=1 SV=1	34	8	30.6	277.7	244.6	1.55836	2.13998	1.37323	0.457569
High	Master Protein	E7ESP4	Integrin alpha-2 OS=Homo sapiens OX=9606 GN=ITGA2 PE=1 SV=1	14	11	102.8	46.2	40.7	0.259259	0.35608	1.37345	0.457808
High	Master Protein	Q99615	DnaJ homolog subfamily C member 7 OS=Homo sapiens OX=9606 GN=DNAJC7 PE=1 SV=2	7	3	56.4	149.8	132	0.840629	1.15486	1.3738	0.458172
High	Master Protein	M0R0R2	40S ribosomal protein S5 OS=Homo sapiens OX=9606 GN=RPS5 PE=1 SV=1	17	5	25.3	357	314.6	2.00337	2.75241	1.37389	0.458267
High	Master Protein	Q53GS9	U4/U6.U5 tri-snRNP-associated protein 2 OS=Homo sapiens OX=9606 GN=USP39 PE=1 SV=2	7	4	65.3	37.9	33.4	0.212682	0.292213	1.37394	0.458322
High	Master Protein	O15118	NPC intracellular cholesterol transporter 1 OS=Homo sapiens OX=9606 GN=NPC1 PE=1 SV=2	4	5	142.1	276.7	243.9	1.55275	2.13386	1.37424	0.458639
High	Master Protein	Q14151	Scaffold attachment factor B2 OS=Homo sapiens OX=9606 GN=SAFB2 PE=1 SV=1	14	12	107.4	136.9	120.7	0.768238	1.05599	1.37457	0.458975
High	Master Protein	P09972	Fructose-bisphosphate aldolase C OS=Homo sapiens OX=9606 GN=ALDOC PE=1 SV=2	20	10	39.4	66.2	58.4	0.371493	0.510936	1.37536	0.459809
High	Master Protein	Q16698	2,4-dienoyl-CoA reductase, mitochondrial OS=Homo sapiens OX=9606 GN=DECR1 PE=1 SV=1	23	5	36	48.5	42.8	0.272166	0.374453	1.37583	0.460298
High	Master Protein	O95302	Peptidyl-prolyl cis-trans isomerase FKBP9 OS=Homo sapiens OX=9606 GN=FKBP9 PE=1 SV=2	5	3	63	121	106.8	0.679012	0.934383	1.37609	0.460577
High	Master Protein	Q9Y5A9	YTH domain-containing family protein 2 OS=Homo sapiens OX=9606 GN=YTHDF2 PE=1 SV=2	3	2	62.3	38.4	33.9	0.215488	0.296588	1.37635	0.460851
High	Master Protein	E9PAV3	Nascent polypeptide-associated complex subunit alpha, muscle-specific form OS=Homo sapiens OX=9606 GN=NACA PE=1 SV=1	4	6	205.3	493.8	436.1	2.77104	3.8154	1.37688	0.461404
High	Master Protein	P26368	Splicing factor U2AF 65 kDa subunit OS=Homo sapiens OX=9606 GN=U2AF2 PE=1 SV=4	18	6	53.5	284.9	251.7	1.59877	2.2021	1.37738	0.461922
High	Master Protein	A0A0G2JM12	Casein kinase II subunit beta OS=Homo sapiens OX=9606 GN=CSNK2B PE=1 SV=1	8	2	34.7	49.8	44	0.279461	0.384952	1.37748	0.46203
High	Master Protein	Q16576	Histone-binding protein RBBP7 OS=Homo sapiens OX=9606 GN=RBBP7 PE=1 SV=1	16	8	47.8	44.9	39.7	0.251964	0.347332	1.3785	0.463095
High	Master Protein	P30825	High affinity cationic amino acid transporter 1 OS=Homo sapiens OX=9606 GN=SLC7A1 PE=1 SV=1	4	2	67.6	51.2	45.3	0.287318	0.396325	1.3794	0.464039
High	Master Protein	E7EVH7	Uncharacterized protein OS=Homo sapiens OX=9606 PE=4 SV=1	14	9	83.6	356.9	315.8	2.00281	2.7629	1.37952	0.464163
High	Master Protein	P61081	NEDD8-conjugating enzyme Ubc12 OS=Homo sapiens OX=9606 GN=UBE2M PE=1 SV=1	31	6	20.9	372.5	329.7	2.09035	2.88451	1.37992	0.464585
High	Master Protein	J9JIE6	Calcium load-activated calcium channel OS=Homo sapiens OX=9606 GN=TMCO1 PE=1 SV=1	10	2	27.1	119.5	105.8	0.670595	0.925634	1.38032	0.465001
High	Master Protein	A0A0A0MTS2	Glucose-6-phosphate isomerase (Fragment) OS=Homo sapiens OX=9606 GN=GPI PE=1 SV=1	29	16	64.8	1008.8	893.3	5.66105	7.8154	1.38056	0.465248
High	Master Protein	Q14690	Protein RRP5 homolog OS=Homo sapiens OX=9606 GN=PDCD11 PE=1 SV=3	1	2	208.6	20.1	17.8	0.112795	0.155731	1.38066	0.465354
High	Master Protein	P50991	T-complex protein 1 subunit delta OS=Homo sapiens OX=9606 GN=CCT4 PE=1 SV=4	38	18	57.9	1081	957.4	6.06622	8.3762	1.38079	0.465499
High	Master Protein	A8K878	Mesencephalic astrocyte-derived neurotrophic factor OS=Homo sapiens OX=9606 GN=MANF PE=1 SV=1	22	3	21.1	78	69.1	0.43771	0.604549	1.38116	0.465884
High	Master Protein	P07437	Tubulin beta chain OS=Homo sapiens OX=9606 GN=TUBB PE=1 SV=2	48	41	49.6	2699.7	2391.7	15.1498	20.9248	1.38119	0.465909
High	Master Protein	Q13619	Cullin-4A OS=Homo sapiens OX=9606 GN=CUL4A PE=1 SV=3	2	2	87.6	30.7	27.2	0.172278	0.23797	1.38131	0.46604
High	Master Protein	P33993	DNA replication licensing factor MCM7 OS=Homo sapiens OX=9606 GN=MCM7 PE=1 SV=4	10	7	81.3	256.3	227.1	1.43827	1.98688	1.38143	0.466166
High	Master Protein	Q8WVM8	Sec1 family domain-containing protein 1 OS=Homo sapiens OX=9606 GN=SCFD1 PE=1 SV=4	11	6	72.3	279	247.3	1.56566	2.1636	1.38192	0.466669
High	Master Protein	P48643	T-complex protein 1 subunit epsilon OS=Homo sapiens OX=9606 GN=CCT5 PE=1 SV=1	45	27	59.6	1170.4	1037.5	6.5679	9.07699	1.38202	0.466782
High	Master Protein	Q00839	Heterogeneous nuclear ribonucleoprotein U OS=Homo sapiens OX=9606 GN=HNRNPU PE=1 SV=6	33	27	90.5	82	72.7	0.460157	0.636045	1.38224	0.467003
High	Master Protein	Q9HD26	Golgi-associated PDZ and coiled-coil motif-containing protein OS=Homo sapiens OX=9606 GN=GOPC PE=1 SV=1	11	5	50.5	250.5	222.1	1.40572	1.94313	1.3823	0.467071
High	Master Protein	Q9UBM7	7-dehydrocholesterol reductase OS=Homo sapiens OX=9606 GN=DHCR7 PE=1 SV=1	11	4	54.5	89	79	0.499439	0.691164	1.38388	0.468719
High	Master Protein	Q9Y3E7	Charged multivesicular body protein 3 OS=Homo sapiens OX=9606 GN=CHMP3 PE=1 SV=3	8	2	25.1	17.8	15.8	0.0998878	0.138233	1.38388	0.468719
High	Master Protein	E7ETY2	Treacle protein OS=Homo sapiens OX=9606 GN=TCOF1 PE=1 SV=1	4	5	152.2	98.1	87.1	0.550505	0.76203	1.38424	0.469092
High	Master Protein	P30086	Phosphatidylethanolamine-binding protein 1 OS=Homo sapiens OX=9606 GN=PEBP1 PE=1 SV=3	51	7	21	508.8	451.8	2.85522	3.95276	1.3844	0.469258
High	Master Protein	Q10471	Polypeptide N-acetylgalactosaminyltransferase 2 OS=Homo sapiens OX=9606 GN=GALNT2 PE=1 SV=1	13	8	64.7	251	222.9	1.40853	1.95013	1.38452	0.469381
High	Master Protein	Q04446	1,4-alpha-glucan-branching enzyme OS=Homo sapiens OX=9606 GN=GBE1 PE=1 SV=3	10	6	80.4	225.4	200.2	1.26487	1.75153	1.38475	0.469626
High	Master Protein	F8VXC8	SWI/SNF complex subunit SMARCC2 OS=Homo sapiens OX=9606 GN=SMARCC2 PE=1 SV=1	5	4	136.1	33.2	29.5	0.186308	0.258093	1.3853	0.470204
High	Master Protein	P49327	Fatty acid synthase OS=Homo sapiens OX=9606 GN=FASN PE=1 SV=3	25	52	273.3	2282.9	2029	12.8109	17.7515	1.38566	0.470573
High	Master Protein	Q9ULW0	Targeting protein for Xklp2 OS=Homo sapiens OX=9606 GN=TPX2 PE=1 SV=2	11	5	85.6	149.3	132.7	0.837823	1.16098	1.38571	0.470626
High	Master Protein	P16615	Sarcoplasmic/endoplasmic reticulum calcium ATPase 2 OS=Homo sapiens OX=9606 GN=ATP2A2 PE=1 SV=1	21	21	114.7	894.7	795.8	5.02076	6.96238	1.38672	0.471674
High	Master Protein	Q9Y6E2	Basic leucine zipper and W2 domain-containing protein 2 OS=Homo sapiens OX=9606 GN=BZW2 PE=1 SV=1	17	7	48.1	181.2	161.3	1.01684	1.4112	1.38783	0.472835
High	Master Protein	Q9H4L5	Oxysterol-binding protein-related protein 3 OS=Homo sapiens OX=9606 GN=OSBPL3 PE=1 SV=1	9	7	101.2	260.7	232.1	1.46296	2.03062	1.38802	0.473028
High	Master Protein	P04843	Dolichyl-diphosphooligosaccharide--protein glycosyltransferase subunit 1 OS=Homo sapiens OX=9606 GN=RPN1 PE=1 SV=1	40	22	68.5	1379.3	1228	7.74018	10.7437	1.38804	0.473046
High	Master Protein	P62906	60S ribosomal protein L10a OS=Homo sapiens OX=9606 GN=RPL10A PE=1 SV=2	35	8	24.8	914.4	814.2	5.13131	7.12336	1.38821	0.47323
High	Master Protein	P31689	DnaJ homolog subfamily A member 1 OS=Homo sapiens OX=9606 GN=DNAJA1 PE=1 SV=2	29	10	44.8	702.9	626.5	3.94444	5.48119	1.3896	0.474667
High	Master Protein	Q14498	RNA-binding protein 39 OS=Homo sapiens OX=9606 GN=RBM39 PE=1 SV=2	10	5	59.3	98.8	88.1	0.554433	0.770779	1.39021	0.475303
High	Master Protein	O76021	Ribosomal L1 domain-containing protein 1 OS=Homo sapiens OX=9606 GN=RSL1D1 PE=1 SV=3	22	11	54.9	484.1	431.7	2.71661	3.7769	1.3903	0.475396
High	Master Protein	P33991	DNA replication licensing factor MCM4 OS=Homo sapiens OX=9606 GN=MCM4 PE=1 SV=5	3	2	96.5	121.1	108	0.679574	0.944882	1.3904	0.475504
High	Master Protein	Q9H0L4	Cleavage stimulation factor subunit 2 tau variant OS=Homo sapiens OX=9606 GN=CSTF2T PE=1 SV=1	3	2	64.4	68.8	61.4	0.386083	0.537183	1.39137	0.476502
High	Master Protein	P16435	NADPH--cytochrome P450 reductase OS=Homo sapiens OX=9606 GN=POR PE=1 SV=2	9	5	76.6	65.2	58.2	0.365881	0.509186	1.39167	0.476819
High	Master Protein	G8JLB6	Heterogeneous nuclear ribonucleoprotein H OS=Homo sapiens OX=9606 GN=HNRNPH1 PE=1 SV=1	26	10	51.2	374.8	334.6	2.10325	2.92738	1.39184	0.476988
High	Master Protein	P56537	Eukaryotic translation initiation factor 6 OS=Homo sapiens OX=9606 GN=EIF6 PE=1 SV=1	23	5	26.6	248.2	221.6	1.39282	1.93876	1.39197	0.477127
High	Master Protein	P11142	Heat shock cognate 71 kDa protein OS=Homo sapiens OX=9606 GN=HSPA8 PE=1 SV=1	70	51	70.9	4145.7	3702	23.2643	32.3885	1.39219	0.477361
High	Master Protein	Q07065	Cytoskeleton-associated protein 4 OS=Homo sapiens OX=9606 GN=CKAP4 PE=1 SV=2	44	25	66	1312.7	1172.3	7.36644	10.2563	1.39231	0.477477
High	Master Protein	A0A0A6YYJ8	Putative RNA-binding protein Luc7-like 2 OS=Homo sapiens OX=9606 GN=LUC7L2 PE=4 SV=1	17	7	54.2	626.9	560.1	3.51796	4.90026	1.39293	0.478121
High	Master Protein	Q93052	Lipoma-preferred partner OS=Homo sapiens OX=9606 GN=LPP PE=1 SV=1	5	2	65.7	29.1	26	0.1633	0.227472	1.39297	0.478164
High	Master Protein	J3QRU1	Tyrosine-protein kinase OS=Homo sapiens OX=9606 GN=YES1 PE=1 SV=1	3	2	61.3	50.8	45.4	0.285073	0.3972	1.39333	0.478536
High	Master Protein	P04818	Thymidylate synthase OS=Homo sapiens OX=9606 GN=TYMS PE=1 SV=3	12	3	35.7	75.5	67.5	0.423681	0.590551	1.39386	0.479083
High	Master Protein	B0YIW6	Archain 1, isoform CRA_a OS=Homo sapiens OX=9606 GN=ARCN1 PE=1 SV=1	22	14	61.6	888.8	794.9	4.98765	6.95451	1.39434	0.479586
High	Master Protein	Q13616	Cullin-1 OS=Homo sapiens OX=9606 GN=CUL1 PE=1 SV=2	6	4	89.6	37.9	33.9	0.212682	0.296588	1.39451	0.479759
High	Master Protein	P30153	Serine/threonine-protein phosphatase 2A 65 kDa regulatory subunit A alpha isoform OS=Homo sapiens OX=9606 GN=PPP2R1A PE=1 SV=4	33	18	65.3	917.4	820.6	5.14815	7.17935	1.39455	0.4798
High	Master Protein	P57740	Nuclear pore complex protein Nup107 OS=Homo sapiens OX=9606 GN=NUP107 PE=1 SV=1	6	4	106.3	40.8	36.5	0.228956	0.319335	1.39474	0.479999
High	Master Protein	Q13641	Trophoblast glycoprotein OS=Homo sapiens OX=9606 GN=TPBG PE=1 SV=1	4	2	46	113.7	101.8	0.638047	0.890639	1.39588	0.481177
High	Master Protein	Q70UQ0	Inhibitor of nuclear factor kappa-B kinase-interacting protein OS=Homo sapiens OX=9606 GN=IKBIP PE=1 SV=1	25	9	39.3	261.7	234.4	1.46857	2.05074	1.39642	0.481731
High	Master Protein	P19338	Nucleolin OS=Homo sapiens OX=9606 GN=NCL PE=1 SV=3	37	32	76.6	2783.4	2494	15.6195	21.8198	1.39695	0.482285
High	Master Protein	P50395	Rab GDP dissociation inhibitor beta OS=Homo sapiens OX=9606 GN=GDI2 PE=1 SV=2	59	23	50.6	1691.1	1515.6	9.4899	13.2598	1.39726	0.482599
High	Master Protein	E9PEB5	Far upstream element-binding protein 1 OS=Homo sapiens OX=9606 GN=FUBP1 PE=1 SV=1	26	15	68.9	601.1	538.8	3.37318	4.71391	1.39747	0.482817
High	Master Protein	Q9NQ29	Putative RNA-binding protein Luc7-like 1 OS=Homo sapiens OX=9606 GN=LUC7L PE=1 SV=1	15	5	43.7	199.8	179.1	1.12121	1.56693	1.39753	0.482881
High	Master Protein	P54577	Tyrosine--tRNA ligase, cytoplasmic OS=Homo sapiens OX=9606 GN=YARS PE=1 SV=4	32	16	59.1	967.1	867	5.42705	7.5853	1.39768	0.483039
High	Master Protein	Q99832	T-complex protein 1 subunit eta OS=Homo sapiens OX=9606 GN=CCT7 PE=1 SV=2	50	26	59.3	1716.2	1539.4	9.63075	13.4681	1.39844	0.483822
High	Master Protein	Q13011	Delta(3,5)-Delta(2,4)-dienoyl-CoA isomerase, mitochondrial OS=Homo sapiens OX=9606 GN=ECH1 PE=1 SV=2	18	5	35.8	138.2	124	0.775533	1.08486	1.39886	0.484254
High	Master Protein	P49588	Alanine--tRNA ligase, cytoplasmic OS=Homo sapiens OX=9606 GN=AARS PE=1 SV=2	10	8	106.7	273.5	245.4	1.53479	2.14698	1.39887	0.484266
High	Master Protein	P41250	Glycine--tRNA ligase OS=Homo sapiens OX=9606 GN=GARS PE=1 SV=3	26	18	83.1	864.4	775.7	4.85073	6.78653	1.39907	0.484472
High	Master Protein	Q7KZF4	Staphylococcal nuclease domain-containing protein 1 OS=Homo sapiens OX=9606 GN=SND1 PE=1 SV=1	39	34	101.9	1535.7	1378.6	8.61785	12.0612	1.39957	0.484979
High	Master Protein	Q5JPH6	Probable glutamate--tRNA ligase, mitochondrial OS=Homo sapiens OX=9606 GN=EARS2 PE=1 SV=2	4	2	58.7	48	43.1	0.26936	0.377078	1.3999	0.485325
High	Master Protein	Q9BY44	Eukaryotic translation initiation factor 2A OS=Homo sapiens OX=9606 GN=EIF2A PE=1 SV=3	13	6	64.9	310.2	278.7	1.74074	2.43832	1.40074	0.486186
High	Master Protein	P13473	Lysosome-associated membrane glycoprotein 2 OS=Homo sapiens OX=9606 GN=LAMP2 PE=1 SV=2	7	3	44.9	89.7	80.6	0.503367	0.705162	1.40089	0.486344
High	Master Protein	P08754	Guanine nucleotide-binding protein G(k) subunit alpha OS=Homo sapiens OX=9606 GN=GNAI3 PE=1 SV=3	21	7	40.5	89.7	80.7	0.503367	0.706037	1.40263	0.488133
High	Master Protein	P49773	Histidine triad nucleotide-binding protein 1 OS=Homo sapiens OX=9606 GN=HINT1 PE=1 SV=2	29	3	13.8	185.6	167	1.04153	1.46107	1.40281	0.488323
High	Master Protein	B4E0Y9	Serine/threonine-protein kinase 26 OS=Homo sapiens OX=9606 GN=STK26 PE=1 SV=1	6	2	49.2	10	9	0.0561167	0.0787402	1.40315	0.488669
High	Master Protein	B0QYN7	SUMO-conjugating enzyme UBC9 OS=Homo sapiens OX=9606 GN=UBE2I PE=1 SV=1	12	2	20.4	75.6	68.1	0.424242	0.595801	1.40439	0.48994
High	Master Protein	Q6FI13	Histone H2A type 2-A OS=Homo sapiens OX=9606 GN=HIST2H2AA3 PE=1 SV=3	52	7	14.1	119.4	107.6	0.670034	0.941382	1.40498	0.490547
High	Master Protein	P18031	Tyrosine-protein phosphatase non-receptor type 1 OS=Homo sapiens OX=9606 GN=PTPN1 PE=1 SV=1	18	6	49.9	270.2	243.5	1.51627	2.13036	1.405	0.490566
High	Master Protein	Q15257	Serine/threonine-protein phosphatase 2A activator OS=Homo sapiens OX=9606 GN=PTPA PE=1 SV=3	17	5	40.6	189	170.4	1.06061	1.49081	1.40562	0.491211
High	Master Protein	P56182	Ribosomal RNA processing protein 1 homolog A OS=Homo sapiens OX=9606 GN=RRP1 PE=1 SV=1	5	2	52.8	51.9	46.8	0.291246	0.409449	1.40585	0.491446
High	Master Protein	Q9BRA2	Thioredoxin domain-containing protein 17 OS=Homo sapiens OX=9606 GN=TXNDC17 PE=1 SV=1	31	3	13.9	249.5	225	1.40011	1.9685	1.40596	0.491557
High	Master Protein	O43583	Density-regulated protein OS=Homo sapiens OX=9606 GN=DENR PE=1 SV=2	25	4	22.1	144.6	130.5	0.811448	1.14173	1.40703	0.492654
High	Master Protein	Q9BW19	Kinesin-like protein KIFC1 OS=Homo sapiens OX=9606 GN=KIFC1 PE=1 SV=2	5	3	73.7	137.9	124.5	0.77385	1.08924	1.40756	0.493195
High	Master Protein	A0A087WTW0	E3 ubiquitin-protein ligase UHRF1 OS=Homo sapiens OX=9606 GN=UHRF1 PE=1 SV=1	3	2	96.6	37.2	33.6	0.208754	0.293963	1.40818	0.493831
High	Master Protein	P06733	Alpha-enolase OS=Homo sapiens OX=9606 GN=ENO1 PE=1 SV=2	65	41	47.1	2830.4	2558.1	15.8833	22.3806	1.40907	0.494739
High	Master Protein	P13861	cAMP-dependent protein kinase type II-alpha regulatory subunit OS=Homo sapiens OX=9606 GN=PRKAR2A PE=1 SV=2	17	6	45.5	156.2	141.2	0.876543	1.23535	1.40934	0.495018
High	Master Protein	P55209	Nucleosome assembly protein 1-like 1 OS=Homo sapiens OX=9606 GN=NAP1L1 PE=1 SV=1	26	8	45.3	272.2	246.1	1.5275	2.15311	1.40956	0.49525
High	Master Protein	Q96I24	Far upstream element-binding protein 3 OS=Homo sapiens OX=9606 GN=FUBP3 PE=1 SV=2	5	3	61.6	23.1	20.9	0.12963	0.182852	1.41057	0.496282
High	Master Protein	O15173	Membrane-associated progesterone receptor component 2 OS=Homo sapiens OX=9606 GN=PGRMC2 PE=1 SV=1	16	5	23.8	175	158.4	0.982043	1.38583	1.41117	0.496889
High	Master Protein	P61158	Actin-related protein 3 OS=Homo sapiens OX=9606 GN=ACTR3 PE=1 SV=3	32	10	47.3	433.7	392.6	2.43378	3.43482	1.41131	0.497035
High	Master Protein	Q01081	Splicing factor U2AF 35 kDa subunit OS=Homo sapiens OX=9606 GN=U2AF1 PE=1 SV=3	25	6	27.9	218.7	198.1	1.22727	1.73316	1.4122	0.497948
High	Master Protein	O00161	Synaptosomal-associated protein 23 OS=Homo sapiens OX=9606 GN=SNAP23 PE=1 SV=1	13	2	23.3	52.3	47.4	0.29349	0.414698	1.41299	0.498748
High	Master Protein	Q32P28	Prolyl 3-hydroxylase 1 OS=Homo sapiens OX=9606 GN=P3H1 PE=1 SV=2	7	7	83.3	198.4	179.9	1.11336	1.57393	1.41368	0.499455
High	Master Protein	P21333	Filamin-A OS=Homo sapiens OX=9606 GN=FLNA PE=1 SV=4	49	103	280.6	6863.7	6225.8	38.5168	54.4689	1.41416	0.499945
High	Master Protein	P08243	Asparagine synthetase [glutamine-hydrolyzing] OS=Homo sapiens OX=9606 GN=ASNS PE=1 SV=4	10	5	64.3	253	229.5	1.41975	2.00787	1.41424	0.500029
High	Master Protein	O95996	Adenomatous polyposis coli protein 2 OS=Homo sapiens OX=9606 GN=APC2 PE=1 SV=1	1	2	243.8	30.3	27.5	0.170034	0.240595	1.41498	0.500786
High	Master Protein	Q14232	Translation initiation factor eIF-2B subunit alpha OS=Homo sapiens OX=9606 GN=EIF2B1 PE=1 SV=1	9	3	33.7	173.3	157.3	0.972503	1.3762	1.41511	0.500919
High	Master Protein	Q13867	Bleomycin hydrolase OS=Homo sapiens OX=9606 GN=BLMH PE=1 SV=1	5	2	52.5	115.2	104.6	0.646465	0.915136	1.4156	0.501414
High	Master Protein	M0QYN0	Myeloid-derived growth factor OS=Homo sapiens OX=9606 GN=MYDGF PE=1 SV=1	19	5	20.4	180.5	163.9	1.01291	1.43395	1.41567	0.501489
High	Master Protein	P54886	Delta-1-pyrroline-5-carboxylate synthase OS=Homo sapiens OX=9606 GN=ALDH18A1 PE=1 SV=2	14	10	87.2	484.2	440	2.71717	3.84952	1.41674	0.502572
High	Master Protein	Q9BUN8	Derlin-1 OS=Homo sapiens OX=9606 GN=DERL1 PE=1 SV=1	8	2	28.8	85.7	77.9	0.48092	0.68154	1.41716	0.503
High	Master Protein	D6RBZ0	Heterogeneous nuclear ribonucleoprotein A/B OS=Homo sapiens OX=9606 GN=HNRNPAB PE=1 SV=1	26	9	35.7	638.7	580.6	3.58418	5.07962	1.41723	0.503078
High	Master Protein	P07355	Annexin A2 OS=Homo sapiens OX=9606 GN=ANXA2 PE=1 SV=2	64	28	38.6	2194.4	1995.6	12.3143	17.4593	1.41781	0.503668
High	Master Protein	P51970	NADH dehydrogenase [ubiquinone] 1 alpha subcomplex subunit 8 OS=Homo sapiens OX=9606 GN=NDUFA8 PE=1 SV=3	25	3	20.1	59.9	54.5	0.336139	0.476815	1.41851	0.504372
High	Master Protein	Q9H307	Pinin OS=Homo sapiens OX=9606 GN=PNN PE=1 SV=5	4	4	81.6	285.2	259.6	1.60045	2.27122	1.41911	0.504988
High	Master Protein	P01112	GTPase HRas OS=Homo sapiens OX=9606 GN=HRAS PE=1 SV=1	20	3	21.3	27.1	24.7	0.152076	0.216098	1.42098	0.50689
High	Master Protein	A0A0A0MTI5	Acyl-CoA-binding protein OS=Homo sapiens OX=9606 GN=DBI PE=1 SV=1	31	4	15.9	202.3	184.4	1.13524	1.6133	1.42111	0.507014
High	Master Protein	P43490	Nicotinamide phosphoribosyltransferase OS=Homo sapiens OX=9606 GN=NAMPT PE=1 SV=1	33	14	55.5	811.9	740.2	4.55612	6.47594	1.42137	0.507285
High	Master Protein	P08238	Heat shock protein HSP 90-beta OS=Homo sapiens OX=9606 GN=HSP90AB1 PE=1 SV=4	53	61	83.2	4583.3	4179.3	25.72	36.5643	1.42163	0.507547
High	Master Protein	O14602	Eukaryotic translation initiation factor 1A, Y-chromosomal OS=Homo sapiens OX=9606 GN=EIF1AY PE=1 SV=4	19	3	16.4	411.8	375.6	2.31089	3.28609	1.422	0.507925
High	Master Protein	Q5VZM2	Ras-related GTP-binding protein B OS=Homo sapiens OX=9606 GN=RRAGB PE=1 SV=1	5	2	43.2	129.4	118.1	0.72615	1.03325	1.42291	0.508843
High	Master Protein	O95757	Heat shock 70 kDa protein 4L OS=Homo sapiens OX=9606 GN=HSPA4L PE=1 SV=3	8	6	94.5	26.4	24.1	0.148148	0.210849	1.42323	0.509167
High	Master Protein	K7ELL7	Glucosidase 2 subunit beta OS=Homo sapiens OX=9606 GN=PRKCSH PE=1 SV=1	33	17	60.2	1229.1	1122.2	6.89731	9.81802	1.42346	0.509399
High	Master Protein	P32320	Cytidine deaminase OS=Homo sapiens OX=9606 GN=CDA PE=1 SV=2	32	3	16.2	112	102.3	0.628507	0.895013	1.42403	0.509979
High	Master Protein	D6RAX7	COP9 constitutive photomorphogenic-like protein subunit 4 isoform 2 OS=Homo sapiens OX=9606 GN=COPS4 PE=1 SV=1	15	5	47.7	47.7	43.6	0.267677	0.381452	1.42505	0.511011
High	Master Protein	Q14566	DNA replication licensing factor MCM6 OS=Homo sapiens OX=9606 GN=MCM6 PE=1 SV=1	9	6	92.8	195.1	178.5	1.09484	1.56168	1.4264	0.512382
High	Master Protein	O15145	Actin-related protein 2/3 complex subunit 3 OS=Homo sapiens OX=9606 GN=ARPC3 PE=1 SV=3	24	5	20.5	401.1	367	2.25084	3.21085	1.42651	0.51249
High	Master Protein	Q92747	Actin-related protein 2/3 complex subunit 1A OS=Homo sapiens OX=9606 GN=ARPC1A PE=2 SV=2	7	3	41.5	106.1	97.1	0.595398	0.849519	1.42681	0.51279
High	Master Protein	Q04637	Eukaryotic translation initiation factor 4 gamma 1 OS=Homo sapiens OX=9606 GN=EIF4G1 PE=1 SV=4	17	26	175.4	851	778.9	4.77553	6.81452	1.42697	0.512951
High	Master Protein	P40926	Malate dehydrogenase, mitochondrial OS=Homo sapiens OX=9606 GN=MDH2 PE=1 SV=3	64	18	35.5	1130.6	1035.6	6.34456	9.06037	1.42805	0.51405
High	Master Protein	A0A0U1RRM4	Polypyrimidine tract-binding protein 1 OS=Homo sapiens OX=9606 GN=PTBP1 PE=1 SV=1	24	8	62.4	165.7	151.9	0.929854	1.32896	1.42921	0.51522
High	Master Protein	Q92520	Protein FAM3C OS=Homo sapiens OX=9606 GN=FAM3C PE=1 SV=1	11	3	24.7	237.1	217.8	1.33053	1.90551	1.43215	0.51818
High	Master Protein	Q13310	Polyadenylate-binding protein 4 OS=Homo sapiens OX=9606 GN=PABPC4 PE=1 SV=1	23	12	70.7	334.6	307.4	1.87767	2.68941	1.43232	0.518352
High	Master Protein	O95861	3'(2'),5'-bisphosphate nucleotidase 1 OS=Homo sapiens OX=9606 GN=BPNT1 PE=1 SV=1	10	2	33.4	91.3	83.9	0.512346	0.734033	1.43269	0.518728
High	Master Protein	O75695	Protein XRP2 OS=Homo sapiens OX=9606 GN=RP2 PE=1 SV=4	7	2	39.6	73.4	67.5	0.411897	0.590551	1.43374	0.519779
High	Master Protein	P00390	Glutathione reductase, mitochondrial OS=Homo sapiens OX=9606 GN=GSR PE=1 SV=2	10	4	56.2	73.2	67.4	0.410774	0.589676	1.43552	0.521577
High	Master Protein	P62140	Serine/threonine-protein phosphatase PP1-beta catalytic subunit OS=Homo sapiens OX=9606 GN=PPP1CB PE=1 SV=3	32	11	37.2	166.1	153.2	0.932099	1.34033	1.43797	0.524036
High	Master Protein	P13010	X-ray repair cross-complementing protein 5 OS=Homo sapiens OX=9606 GN=XRCC5 PE=1 SV=3	26	19	82.7	1411.7	1302.5	7.922	11.3955	1.43846	0.524522
High	Master Protein	Q9H074	Polyadenylate-binding protein-interacting protein 1 OS=Homo sapiens OX=9606 GN=PAIP1 PE=1 SV=1	5	2	53.5	27.2	25.1	0.152637	0.219598	1.43869	0.524753
High	Master Protein	O43172	U4/U6 small nuclear ribonucleoprotein Prp4 OS=Homo sapiens OX=9606 GN=PRPF4 PE=1 SV=2	15	6	58.4	60.5	55.9	0.339506	0.489064	1.44052	0.526585
High	Master Protein	O15371	Eukaryotic translation initiation factor 3 subunit D OS=Homo sapiens OX=9606 GN=EIF3D PE=1 SV=1	29	11	63.9	345.2	319	1.93715	2.7909	1.44073	0.526796
High	Master Protein	Q14019	Coactosin-like protein OS=Homo sapiens OX=9606 GN=COTL1 PE=1 SV=3	44	8	15.9	628.1	580.7	3.52469	5.08049	1.4414	0.527471
High	Master Protein	P67812	Signal peptidase complex catalytic subunit SEC11A OS=Homo sapiens OX=9606 GN=SEC11A PE=1 SV=1	15	3	20.6	168.3	155.6	0.944444	1.36133	1.44141	0.527479
High	Master Protein	O43852	Calumenin OS=Homo sapiens OX=9606 GN=CALU PE=1 SV=2	45	14	37.1	1002.8	927.2	5.62738	8.11199	1.44152	0.527591
High	Master Protein	P07237	Protein disulfide-isomerase OS=Homo sapiens OX=9606 GN=P4HB PE=1 SV=3	60	32	57.1	2895.6	2679.3	16.2492	23.4409	1.44259	0.528666
High	Master Protein	H0YMV8	40S ribosomal protein S27 OS=Homo sapiens OX=9606 GN=RPS27L PE=1 SV=1	21	3	11.3	47.2	43.7	0.264871	0.382327	1.44345	0.529518
High	Master Protein	E9PRY8	Elongation factor 1-delta OS=Homo sapiens OX=9606 GN=EEF1D PE=1 SV=1	13	7	76.5	270.8	251	1.51964	2.19598	1.44506	0.531132
High	Master Protein	Q6NZI2	Caveolae-associated protein 1 OS=Homo sapiens OX=9606 GN=CAVIN1 PE=1 SV=1	22	8	43.5	312	289.2	1.75084	2.53018	1.44512	0.531193
High	Master Protein	P12429	Annexin A3 OS=Homo sapiens OX=9606 GN=ANXA3 PE=1 SV=3	40	12	36.4	563.7	522.7	3.1633	4.57305	1.44566	0.531728
High	Master Protein	Q9NUQ6	SPATS2-like protein OS=Homo sapiens OX=9606 GN=SPATS2L PE=1 SV=2	17	9	61.7	387.5	359.5	2.17452	3.14523	1.4464	0.532467
High	Master Protein	Q06830	Peroxiredoxin-1 OS=Homo sapiens OX=9606 GN=PRDX1 PE=1 SV=1	62	14	22.1	1712.9	1590.4	9.61223	13.9143	1.44756	0.533621
High	Master Protein	Q9Y2Z0	Protein SGT1 homolog OS=Homo sapiens OX=9606 GN=SUGT1 PE=1 SV=3	27	7	41	254.2	236.1	1.42649	2.06562	1.44804	0.534106
High	Master Protein	F5GYQ1	V-type proton ATPase subunit OS=Homo sapiens OX=9606 GN=ATP6V0D1 PE=1 SV=1	7	3	44.6	92.4	85.9	0.518519	0.751531	1.44938	0.535437
High	Master Protein	Q6P1J9	Parafibromin OS=Homo sapiens OX=9606 GN=CDC73 PE=1 SV=1	4	2	60.5	28.9	26.9	0.162177	0.235346	1.45116	0.537209
High	Master Protein	P61513	60S ribosomal protein L37a OS=Homo sapiens OX=9606 GN=RPL37A PE=1 SV=2	28	2	10.3	20.4	19	0.114478	0.166229	1.45206	0.538102
High	Master Protein	Q16629	Serine/arginine-rich splicing factor 7 OS=Homo sapiens OX=9606 GN=SRSF7 PE=1 SV=1	21	5	27.4	122.8	114.4	0.689113	1.00087	1.45241	0.538448
High	Master Protein	P37802	Transgelin-2 OS=Homo sapiens OX=9606 GN=TAGLN2 PE=1 SV=3	60	17	22.4	601.9	560.8	3.37767	4.90639	1.4526	0.538634
High	Master Protein	O75822	Eukaryotic translation initiation factor 3 subunit J OS=Homo sapiens OX=9606 GN=EIF3J PE=1 SV=2	7	2	29	60.3	56.2	0.338384	0.491689	1.45305	0.539084
High	Master Protein	P30837	Aldehyde dehydrogenase X, mitochondrial OS=Homo sapiens OX=9606 GN=ALDH1B1 PE=1 SV=3	13	5	57.2	187.2	174.5	1.05051	1.52668	1.45329	0.539319
High	Master Protein	A0A024R571	EH domain-containing protein 1 OS=Homo sapiens OX=9606 GN=EHD1 PE=1 SV=1	28	14	61.9	997.8	930.6	5.59933	8.14173	1.45406	0.540082
High	Master Protein	Q6NXE6	Armadillo repeat-containing protein 6 OS=Homo sapiens OX=9606 GN=ARMC6 PE=1 SV=2	10	4	54.1	160.4	149.7	0.900112	1.30971	1.45505	0.541072
High	Master Protein	P21281	V-type proton ATPase subunit B, brain isoform OS=Homo sapiens OX=9606 GN=ATP6V1B2 PE=1 SV=3	10	4	56.5	138.8	129.6	0.7789	1.13386	1.45572	0.54173
High	Master Protein	P28482	Mitogen-activated protein kinase 1 OS=Homo sapiens OX=9606 GN=MAPK1 PE=1 SV=3	21	6	41.4	288.4	269.3	1.61841	2.35608	1.4558	0.541815
High	Master Protein	Q9H9J2	39S ribosomal protein L44, mitochondrial OS=Homo sapiens OX=9606 GN=MRPL44 PE=1 SV=1	8	2	37.5	13.6	12.7	0.0763187	0.111111	1.45588	0.541894
High	Master Protein	O75475	PC4 and SFRS1-interacting protein OS=Homo sapiens OX=9606 GN=PSIP1 PE=1 SV=1	4	2	60.1	100.2	93.6	0.56229	0.818898	1.45636	0.54237
High	Master Protein	Q9UHB9	Signal recognition particle subunit SRP68 OS=Homo sapiens OX=9606 GN=SRP68 PE=1 SV=2	13	7	70.7	327.4	305.9	1.83726	2.67629	1.45667	0.542678
High	Master Protein	P09661	U2 small nuclear ribonucleoprotein A' OS=Homo sapiens OX=9606 GN=SNRPA1 PE=1 SV=2	20	5	28.4	102.6	95.9	0.575758	0.83902	1.45725	0.543244
High	Master Protein	P61221	ATP-binding cassette sub-family E member 1 OS=Homo sapiens OX=9606 GN=ABCE1 PE=1 SV=1	18	9	67.3	387.6	362.4	2.17508	3.1706	1.45769	0.543686
High	Master Protein	Q06210	Glutamine--fructose-6-phosphate aminotransferase [isomerizing] 1 OS=Homo sapiens OX=9606 GN=GFPT1 PE=1 SV=3	22	13	78.8	654.4	612.3	3.67228	5.35696	1.45876	0.544738
High	Master Protein	P28288	ATP-binding cassette sub-family D member 3 OS=Homo sapiens OX=9606 GN=ABCD3 PE=1 SV=1	6	3	75.4	47.8	44.8	0.268238	0.391951	1.46121	0.54716
High	Master Protein	Q9P2E9	Ribosome-binding protein 1 OS=Homo sapiens OX=9606 GN=RRBP1 PE=1 SV=4	40	39	152.4	1262.5	1184.1	7.08474	10.3596	1.46224	0.548179
High	Master Protein	Q13085	Acetyl-CoA carboxylase 1 OS=Homo sapiens OX=9606 GN=ACACA PE=1 SV=2	3	5	265.4	166.2	156.1	0.93266	1.3657	1.46431	0.550222
High	Master Protein	Q92979	Ribosomal RNA small subunit methyltransferase NEP1 OS=Homo sapiens OX=9606 GN=EMG1 PE=1 SV=4	14	3	26.7	72.6	68.2	0.407407	0.596675	1.46457	0.550474
High	Master Protein	P09651	Heterogeneous nuclear ribonucleoprotein A1 OS=Homo sapiens OX=9606 GN=HNRNPA1 PE=1 SV=5	44	20	38.7	675.1	634.2	3.78844	5.54856	1.4646	0.550509
High	Master Protein	A0A1W2PNX8	Protein unc-45 homolog A OS=Homo sapiens OX=9606 GN=UNC45A PE=1 SV=1	5	4	118.3	96	90.2	0.538721	0.789151	1.46486	0.550765
High	Master Protein	J3KN67	Tropomyosin alpha-3 chain OS=Homo sapiens OX=9606 GN=TPM3 PE=1 SV=1	33	15	33.2	415.3	390.4	2.33053	3.41557	1.46558	0.551471
High	Master Protein	P61586	Transforming protein RhoA OS=Homo sapiens OX=9606 GN=RHOA PE=1 SV=1	42	10	21.8	586.9	551.8	3.29349	4.82765	1.46581	0.551703
High	Master Protein	Q96I25	Splicing factor 45 OS=Homo sapiens OX=9606 GN=RBM17 PE=1 SV=1	11	4	44.9	62.6	58.9	0.351291	0.515311	1.46691	0.552777
High	Master Protein	P26641	Elongation factor 1-gamma OS=Homo sapiens OX=9606 GN=EEF1G PE=1 SV=3	41	18	50.1	1451.6	1366.2	8.1459	11.9528	1.46733	0.553197
High	Master Protein	P61011	Signal recognition particle 54 kDa protein OS=Homo sapiens OX=9606 GN=SRP54 PE=1 SV=1	8	5	55.7	142.9	134.5	0.801908	1.17673	1.46741	0.553272
High	Master Protein	Q68CZ2	Tensin-3 OS=Homo sapiens OX=9606 GN=TNS3 PE=1 SV=2	2	2	155.2	86.8	81.8	0.487093	0.715661	1.46925	0.555078
High	Master Protein	Q14914	Prostaglandin reductase 1 OS=Homo sapiens OX=9606 GN=PTGR1 PE=1 SV=2	5	2	35.8	24.4	23	0.136925	0.201225	1.4696	0.555425
High	Master Protein	Q9H0S4	Probable ATP-dependent RNA helicase DDX47 OS=Homo sapiens OX=9606 GN=DDX47 PE=1 SV=1	3	2	50.6	28.4	26.8	0.159371	0.234471	1.47122	0.557014
High	Master Protein	Q8NFH3	Nucleoporin Nup43 OS=Homo sapiens OX=9606 GN=NUP43 PE=1 SV=1	6	2	42.1	25.6	24.2	0.143659	0.211724	1.47379	0.559535
High	Master Protein	P49137	MAP kinase-activated protein kinase 2 OS=Homo sapiens OX=9606 GN=MAPKAPK2 PE=1 SV=1	7	3	45.5	97.4	92.1	0.546577	0.805774	1.47422	0.559951
High	Master Protein	P04075	Fructose-bisphosphate aldolase A OS=Homo sapiens OX=9606 GN=ALDOA PE=1 SV=2	54	26	39.4	1830.6	1731.8	10.2727	15.1514	1.47491	0.560628
High	Master Protein	P46939	Utrophin OS=Homo sapiens OX=9606 GN=UTRN PE=1 SV=2	2	5	394.2	91.4	86.5	0.512907	0.75678	1.47547	0.561178
High	Master Protein	Q01650	Large neutral amino acids transporter small subunit 1 OS=Homo sapiens OX=9606 GN=SLC7A5 PE=1 SV=2	13	5	55	201.4	190.8	1.13019	1.66929	1.477	0.562669
High	Master Protein	P48960	CD97 antigen OS=Homo sapiens OX=9606 GN=CD97 PE=1 SV=4	3	2	91.8	64.7	61.3	0.363075	0.536308	1.47713	0.562793
High	Master Protein	E7EWW9	Glutathione S-transferase Mu 1 OS=Homo sapiens OX=9606 GN=GSTM1 PE=1 SV=1	8	2	27.6	13.4	12.7	0.0751964	0.111111	1.47761	0.563267
High	Master Protein	Q8IWE2	Protein NOXP20 OS=Homo sapiens OX=9606 GN=FAM114A1 PE=1 SV=2	4	2	60.7	65.7	62.4	0.368687	0.545932	1.48075	0.566325
High	Master Protein	Q5JRX3	Presequence protease, mitochondrial OS=Homo sapiens OX=9606 GN=PITRM1 PE=1 SV=3	6	7	117.3	217.7	206.8	1.22166	1.80927	1.48099	0.566567
High	Master Protein	P52943	Cysteine-rich protein 2 OS=Homo sapiens OX=9606 GN=CRIP2 PE=1 SV=1	25	2	22.5	60	57	0.3367	0.498688	1.4811	0.566671
High	Master Protein	O94973	AP-2 complex subunit alpha-2 OS=Homo sapiens OX=9606 GN=AP2A2 PE=1 SV=2	11	10	103.9	92.8	88.2	0.520763	0.771654	1.48177	0.567326
High	Master Protein	Q96AG4	Leucine-rich repeat-containing protein 59 OS=Homo sapiens OX=9606 GN=LRRC59 PE=1 SV=1	50	12	34.9	831.2	790.2	4.66442	6.91339	1.48215	0.567694
High	Master Protein	Q15428	Splicing factor 3A subunit 2 OS=Homo sapiens OX=9606 GN=SF3A2 PE=1 SV=2	10	5	49.2	220.2	209.5	1.23569	1.8329	1.4833	0.568808
High	Master Protein	A0A087WUZ3	Spectrin beta chain OS=Homo sapiens OX=9606 GN=SPTBN1 PE=1 SV=1	25	58	274.7	2974	2833.8	16.6891	24.7927	1.48556	0.571005
High	Master Protein	P61289	Proteasome activator complex subunit 3 OS=Homo sapiens OX=9606 GN=PSME3 PE=1 SV=1	19	4	29.5	112.6	107.3	0.631874	0.938758	1.48567	0.571115
High	Master Protein	P53396	ATP-citrate synthase OS=Homo sapiens OX=9606 GN=ACLY PE=1 SV=3	29	30	120.8	1196.3	1141.2	6.71324	9.98425	1.48725	0.572644
High	Master Protein	P49411	Elongation factor Tu, mitochondrial OS=Homo sapiens OX=9606 GN=TUFM PE=1 SV=2	25	10	49.5	432.6	413	2.42761	3.6133	1.48842	0.57378
High	Master Protein	P21283	V-type proton ATPase subunit C 1 OS=Homo sapiens OX=9606 GN=ATP6V1C1 PE=1 SV=4	9	4	43.9	365.8	349.4	2.05275	3.05687	1.48916	0.574496
High	Master Protein	O94851	[F-actin]-monooxygenase MICAL2 OS=Homo sapiens OX=9606 GN=MICAL2 PE=1 SV=1	3	3	126.6	58.2	55.7	0.326599	0.487314	1.49209	0.57733
High	Master Protein	Q9H488	GDP-fucose protein O-fucosyltransferase 1 OS=Homo sapiens OX=9606 GN=POFUT1 PE=1 SV=1	11	4	43.9	210.8	201.8	1.18294	1.76553	1.49249	0.577723
High	Master Protein	Q8WX93	Palladin OS=Homo sapiens OX=9606 GN=PALLD PE=1 SV=3	5	5	150.5	68.1	65.2	0.382155	0.570429	1.49266	0.577889
High	Master Protein	O60343	TBC1 domain family member 4 OS=Homo sapiens OX=9606 GN=TBC1D4 PE=1 SV=2	2	2	146.5	78.1	74.8	0.438272	0.654418	1.49318	0.578388
High	Master Protein	P08579	U2 small nuclear ribonucleoprotein B'' OS=Homo sapiens OX=9606 GN=SNRPB2 PE=1 SV=1	23	5	25.5	130.9	125.4	0.734568	1.09711	1.49355	0.578744
High	Master Protein	Q15437	Protein transport protein Sec23B OS=Homo sapiens OX=9606 GN=SEC23B PE=1 SV=2	2	2	86.4	213.6	204.8	1.19865	1.79178	1.49482	0.579976
High	Master Protein	Q9BQ67	Glutamate-rich WD repeat-containing protein 1 OS=Homo sapiens OX=9606 GN=GRWD1 PE=1 SV=1	7	2	49.4	119.3	114.4	0.669473	1.00087	1.49502	0.580165
High	Master Protein	P53801	Pituitary tumor-transforming gene 1 protein-interacting protein OS=Homo sapiens OX=9606 GN=PTTG1IP PE=1 SV=1	8	2	20.3	126.9	121.7	0.712121	1.06474	1.49517	0.580309
High	Master Protein	Q9GZR7	ATP-dependent RNA helicase DDX24 OS=Homo sapiens OX=9606 GN=DDX24 PE=1 SV=1	3	2	96.3	39.4	37.8	0.2211	0.330709	1.49574	0.580863
High	Master Protein	Q10567	AP-1 complex subunit beta-1 OS=Homo sapiens OX=9606 GN=AP1B1 PE=1 SV=2	13	12	104.6	10	9.6	0.0561167	0.0839895	1.49669	0.581778
High	Master Protein	Q99442	Translocation protein SEC62 OS=Homo sapiens OX=9606 GN=SEC62 PE=1 SV=1	8	3	45.8	157.3	151.2	0.882716	1.32283	1.4986	0.583611
High	Master Protein	P51991	Heterogeneous nuclear ribonucleoprotein A3 OS=Homo sapiens OX=9606 GN=HNRNPA3 PE=1 SV=2	30	13	39.6	518.7	498.7	2.91077	4.36308	1.49894	0.583944
High	Master Protein	A0A0D9SF53	ATP-dependent RNA helicase DDX3X OS=Homo sapiens OX=9606 GN=DDX3X PE=1 SV=1	28	19	81.4	713	685.8	4.00112	6	1.49958	0.584558
High	Master Protein	H7C4C5	Microtubule-associated protein (Fragment) OS=Homo sapiens OX=9606 GN=MAP4 PE=1 SV=1	32	15	50.9	10.5	10.1	0.0589226	0.088364	1.49966	0.584638
High	Master Protein	Q93008	Probable ubiquitin carboxyl-terminal hydrolase FAF-X OS=Homo sapiens OX=9606 GN=USP9X PE=1 SV=3	3	6	292.1	72.5	69.8	0.406846	0.610674	1.50099	0.585918
High	Master Protein	O95292	Vesicle-associated membrane protein-associated protein B/C OS=Homo sapiens OX=9606 GN=VAPB PE=1 SV=3	11	2	27.2	54.4	52.4	0.305275	0.458443	1.50174	0.586632
High	Master Protein	P14625	Endoplasmin OS=Homo sapiens OX=9606 GN=HSP90B1 PE=1 SV=1	39	34	92.4	1861.7	1796.7	10.4473	15.7192	1.50462	0.589401
High	Master Protein	P14735	Insulin-degrading enzyme OS=Homo sapiens OX=9606 GN=IDE PE=1 SV=4	5	3	117.9	198.7	191.8	1.11504	1.67804	1.50492	0.589683
High	Master Protein	Q09666	Neuroblast differentiation-associated protein AHNAK OS=Homo sapiens OX=9606 GN=AHNAK PE=1 SV=2	56	199	628.7	12789	12351.2	71.7677	108.059	1.50568	0.59042
High	Master Protein	O95373	Importin-7 OS=Homo sapiens OX=9606 GN=IPO7 PE=1 SV=1	17	14	119.4	526	508	2.95174	4.44444	1.5057	0.590438
High	Master Protein	P54709	Sodium/potassium-transporting ATPase subunit beta-3 OS=Homo sapiens OX=9606 GN=ATP1B3 PE=1 SV=1	14	3	31.5	130.5	126.1	0.732323	1.10324	1.50649	0.59119
High	Master Protein	Q96N66	Lysophospholipid acyltransferase 7 OS=Homo sapiens OX=9606 GN=MBOAT7 PE=1 SV=2	13	5	52.7	152	146.9	0.852974	1.28521	1.50674	0.591435
High	Master Protein	Q7RTV0	PHD finger-like domain-containing protein 5A OS=Homo sapiens OX=9606 GN=PHF5A PE=1 SV=1	40	4	12.4	57.6	55.7	0.323232	0.487314	1.50763	0.59228
High	Master Protein	P08240	Signal recognition particle receptor subunit alpha OS=Homo sapiens OX=9606 GN=SRPRA PE=1 SV=2	5	2	69.8	72.3	70	0.405724	0.612423	1.50946	0.594031
High	Master Protein	A0A0A0MSS8	Aldo-keto reductase family 1 member C3 OS=Homo sapiens OX=9606 GN=AKR1C3 PE=1 SV=1	27	7	36.8	214.6	208.1	1.20426	1.82065	1.51183	0.596299
High	Master Protein	O43592	Exportin-T OS=Homo sapiens OX=9606 GN=XPOT PE=1 SV=2	4	3	109.9	76.7	74.4	0.430415	0.650919	1.5123	0.596748
High	Master Protein	P11413	Glucose-6-phosphate 1-dehydrogenase OS=Homo sapiens OX=9606 GN=G6PD PE=1 SV=4	43	19	59.2	1202	1167.4	6.74523	10.2135	1.51418	0.598534
High	Master Protein	P51648	Fatty aldehyde dehydrogenase OS=Homo sapiens OX=9606 GN=ALDH3A2 PE=1 SV=1	7	3	54.8	112	108.9	0.628507	0.952756	1.5159	0.600177
High	Master Protein	B4DLN1	cDNA FLJ60124, highly similar to Mitochondrial dicarboxylate carrier OS=Homo sapiens OX=9606 PE=2 SV=1	10	4	48.1	167.5	163	0.939955	1.42607	1.51717	0.601383
High	Master Protein	Q02790	Peptidyl-prolyl cis-trans isomerase FKBP4 OS=Homo sapiens OX=9606 GN=FKBP4 PE=1 SV=3	34	13	51.8	454.3	442.1	2.54938	3.86789	1.51719	0.601399
High	Master Protein	Q16222	UDP-N-acetylhexosamine pyrophosphorylase OS=Homo sapiens OX=9606 GN=UAP1 PE=1 SV=3	7	3	58.7	125.6	122.3	0.704826	1.06999	1.51809	0.60226
High	Master Protein	Q14315	Filamin-C OS=Homo sapiens OX=9606 GN=FLNC PE=1 SV=3	27	58	290.8	1389.4	1353.9	7.79686	11.8451	1.51922	0.603331
High	Master Protein	Q16881	Thioredoxin reductase 1, cytoplasmic OS=Homo sapiens OX=9606 GN=TXNRD1 PE=1 SV=3	23	13	70.9	691.8	674.5	3.88215	5.90114	1.52007	0.604135
High	Master Protein	P31947	14-3-3 protein sigma OS=Homo sapiens OX=9606 GN=SFN PE=1 SV=1	58	17	27.8	437.8	427	2.45679	3.73578	1.5206	0.604636
High	Master Protein	O00151	PDZ and LIM domain protein 1 OS=Homo sapiens OX=9606 GN=PDLIM1 PE=1 SV=4	28	9	36	276	269.4	1.54882	2.35696	1.52177	0.605754
High	Master Protein	P04179	Superoxide dismutase [Mn], mitochondrial OS=Homo sapiens OX=9606 GN=SOD2 PE=1 SV=3	16	4	24.7	339.3	331.9	1.90404	2.90376	1.52505	0.608859
High	Master Protein	E9PKU7	Neutral alpha-glucosidase AB OS=Homo sapiens OX=9606 GN=GANAB PE=1 SV=1	28	20	96.5	121.8	119.2	0.683502	1.04287	1.52577	0.609542
High	Master Protein	Q9NZ45	CDGSH iron-sulfur domain-containing protein 1 OS=Homo sapiens OX=9606 GN=CISD1 PE=1 SV=1	26	3	12.2	64.7	63.4	0.363075	0.554681	1.52773	0.611389
High	Master Protein	D6RB85	Calnexin (Fragment) OS=Homo sapiens OX=9606 GN=CANX PE=1 SV=1	41	8	16	60.8	59.6	0.34119	0.521435	1.52828	0.611913
High	Master Protein	Q9UHG3	Prenylcysteine oxidase 1 OS=Homo sapiens OX=9606 GN=PCYOX1 PE=1 SV=3	20	9	56.6	318	311.8	1.78451	2.72791	1.52866	0.612266
High	Master Protein	P78406	mRNA export factor OS=Homo sapiens OX=9606 GN=RAE1 PE=1 SV=1	8	3	40.9	243.6	238.9	1.367	2.09011	1.52897	0.612565
High	Master Protein	Q8NFH5	Nucleoporin NUP35 OS=Homo sapiens OX=9606 GN=NUP35 PE=1 SV=1	10	2	34.8	10.6	10.4	0.0594837	0.0909886	1.52964	0.613191
High	Master Protein	Q13895	Bystin OS=Homo sapiens OX=9606 GN=BYSL PE=1 SV=3	7	3	49.6	82.5	81	0.462963	0.708661	1.53071	0.6142
High	Master Protein	P00167	Cytochrome b5 OS=Homo sapiens OX=9606 GN=CYB5A PE=1 SV=2	20	2	15.3	133.5	131.1	0.749158	1.14698	1.53103	0.6145
High	Master Protein	Q03135	Caveolin-1 OS=Homo sapiens OX=9606 GN=CAV1 PE=1 SV=4	45	8	20.5	575.8	565.5	3.2312	4.94751	1.53117	0.614631
High	Master Protein	O76094	Signal recognition particle subunit SRP72 OS=Homo sapiens OX=9606 GN=SRP72 PE=1 SV=3	17	10	74.6	380.6	374.4	2.1358	3.27559	1.53366	0.616977
High	Master Protein	Q9NZW5	MAGUK p55 subfamily member 6 OS=Homo sapiens OX=9606 GN=MPP6 PE=1 SV=2	3	2	61.1	12.6	12.4	0.0707071	0.108486	1.53431	0.617588
High	Master Protein	Q8TDB8	Solute carrier family 2, facilitated glucose transporter member 14 OS=Homo sapiens OX=9606 GN=SLC2A14 PE=2 SV=1	6	2	56.3	75.7	74.6	0.424804	0.652668	1.5364	0.619554
High	Master Protein	P55263	Adenosine kinase OS=Homo sapiens OX=9606 GN=ADK PE=1 SV=2	20	6	40.5	439.9	433.6	2.46857	3.79353	1.53673	0.619861
High	Master Protein	P63241	Eukaryotic translation initiation factor 5A-1 OS=Homo sapiens OX=9606 GN=EIF5A PE=1 SV=2	42	5	16.8	396.4	390.8	2.22447	3.41907	1.53703	0.620145
High	Master Protein	P49959	Double-strand break repair protein MRE11 OS=Homo sapiens OX=9606 GN=MRE11 PE=1 SV=3	6	4	80.5	106.7	105.2	0.598765	0.920385	1.53714	0.620246
High	Master Protein	P16070	CD44 antigen OS=Homo sapiens OX=9606 GN=CD44 PE=1 SV=3	10	9	81.5	705.5	698.1	3.95903	6.10761	1.5427	0.62546
High	Master Protein	C9IZQ1	Translocon-associated protein subunit alpha OS=Homo sapiens OX=9606 GN=SSR1 PE=1 SV=1	11	3	33.9	248.4	245.8	1.39394	2.15048	1.54274	0.625492
High	Master Protein	O75369	Filamin-B OS=Homo sapiens OX=9606 GN=FLNB PE=1 SV=2	48	100	278	5508.4	5451.1	30.9113	47.6912	1.54284	0.625586
High	Master Protein	P68402	Platelet-activating factor acetylhydrolase IB subunit beta OS=Homo sapiens OX=9606 GN=PAFAH1B2 PE=1 SV=1	7	2	25.6	19.7	19.5	0.11055	0.170604	1.54323	0.62595
High	Master Protein	Q9NX24	H/ACA ribonucleoprotein complex subunit 2 OS=Homo sapiens OX=9606 GN=NHP2 PE=1 SV=1	25	2	17.2	80.7	80	0.452862	0.699913	1.54553	0.628103
High	Master Protein	Q9Y5M8	Signal recognition particle receptor subunit beta OS=Homo sapiens OX=9606 GN=SRPRB PE=1 SV=3	30	6	29.7	233.4	231.5	1.30976	2.02537	1.54636	0.62888
High	Master Protein	P62820	Ras-related protein Rab-1A OS=Homo sapiens OX=9606 GN=RAB1A PE=1 SV=3	45	9	22.7	61.5	61	0.345118	0.533683	1.54638	0.628895
High	Master Protein	P52292	Importin subunit alpha-1 OS=Homo sapiens OX=9606 GN=KPNA2 PE=1 SV=1	25	11	57.8	353.4	352.2	1.98316	3.08136	1.55376	0.635765
High	Master Protein	Q13162	Peroxiredoxin-4 OS=Homo sapiens OX=9606 GN=PRDX4 PE=1 SV=1	37	9	30.5	348.6	347.7	1.95623	3.04199	1.55503	0.636942
High	Master Protein	P11021	Endoplasmic reticulum chaperone BiP OS=Homo sapiens OX=9606 GN=HSPA5 PE=1 SV=2	47	33	72.3	2383.5	2377.5	13.3754	20.8005	1.55513	0.637036
High	Master Protein	Q8NBS9	Thioredoxin domain-containing protein 5 OS=Homo sapiens OX=9606 GN=TXNDC5 PE=1 SV=2	25	12	47.6	424.7	424.5	2.38328	3.71391	1.55832	0.639992
High	Master Protein	Q7L5D6	Golgi to ER traffic protein 4 homolog OS=Homo sapiens OX=9606 GN=GET4 PE=1 SV=1	6	2	36.5	14.9	14.9	0.0836139	0.130359	1.55906	0.640672
High	Master Protein	Q9UIQ6	Leucyl-cystinyl aminopeptidase OS=Homo sapiens OX=9606 GN=LNPEP PE=1 SV=3	4	3	117.3	47.1	47.2	0.26431	0.412948	1.56237	0.643732
High	Master Protein	P48506	Glutamate--cysteine ligase catalytic subunit OS=Homo sapiens OX=9606 GN=GCLC PE=1 SV=2	4	2	72.7	46.4	46.5	0.260382	0.406824	1.56242	0.643778
High	Master Protein	P30405	Peptidyl-prolyl cis-trans isomerase F, mitochondrial OS=Homo sapiens OX=9606 GN=PPIF PE=1 SV=1	29	5	22	117.5	117.8	0.659371	1.03062	1.56304	0.644351
High	Master Protein	Q9BVP2	Guanine nucleotide-binding protein-like 3 OS=Homo sapiens OX=9606 GN=GNL3 PE=1 SV=2	10	5	62	229.1	230	1.28563	2.01225	1.56518	0.646328
High	Master Protein	P10768	S-formylglutathione hydrolase OS=Homo sapiens OX=9606 GN=ESD PE=1 SV=2	10	3	31.4	43.4	43.6	0.243547	0.381452	1.56624	0.647305
High	Master Protein	P02751	Fibronectin OS=Homo sapiens OX=9606 GN=FN1 PE=1 SV=4	7	11	262.5	252	253.4	1.41414	2.21697	1.56772	0.648665
High	Master Protein	Q02809	Procollagen-lysine,2-oxoglutarate 5-dioxygenase 1 OS=Homo sapiens OX=9606 GN=PLOD1 PE=1 SV=2	17	8	83.5	301.2	303	1.69024	2.65092	1.56837	0.649268
High	Master Protein	Q13546	Receptor-interacting serine/threonine-protein kinase 1 OS=Homo sapiens OX=9606 GN=RIPK1 PE=1 SV=3	8	4	75.9	49.9	50.2	0.280022	0.439195	1.56843	0.649319
High	Master Protein	P63173	60S ribosomal protein L38 OS=Homo sapiens OX=9606 GN=RPL38 PE=1 SV=2	31	2	8.2	115.8	116.6	0.649832	1.02012	1.56983	0.650604
High	Master Protein	O75832	26S proteasome non-ATPase regulatory subunit 10 OS=Homo sapiens OX=9606 GN=PSMD10 PE=1 SV=1	23	3	24.4	114.2	115	0.640853	1.00612	1.56998	0.650743
High	Master Protein	J3KMZ9	Low-density lipoprotein receptor (Fragment) OS=Homo sapiens OX=9606 GN=LDLR PE=1 SV=1	5	4	104.6	110.8	111.6	0.621773	0.976378	1.57031	0.651051
High	Master Protein	J3KPF3	4F2 cell-surface antigen heavy chain OS=Homo sapiens OX=9606 GN=SLC3A2 PE=1 SV=1	23	14	68.1	896.4	904.6	5.0303	7.91426	1.57332	0.653809
High	Master Protein	Q5T4S7	E3 ubiquitin-protein ligase UBR4 OS=Homo sapiens OX=9606 GN=UBR4 PE=1 SV=1	1	5	573.5	158.6	160.4	0.890011	1.40332	1.57675	0.656953
High	Master Protein	Q9NP72	Ras-related protein Rab-18 OS=Homo sapiens OX=9606 GN=RAB18 PE=1 SV=1	18	4	23	158.2	160.1	0.887767	1.4007	1.57778	0.657896
High	Master Protein	O43854	EGF-like repeat and discoidin I-like domain-containing protein 3 OS=Homo sapiens OX=9606 GN=EDIL3 PE=1 SV=1	7	3	53.7	260.7	264	1.46296	2.30971	1.57879	0.658819
High	Master Protein	P62263	40S ribosomal protein S14 OS=Homo sapiens OX=9606 GN=RPS14 PE=1 SV=3	39	8	16.3	427	432.5	2.39618	3.7839	1.57914	0.659136
High	Master Protein	O15305	Phosphomannomutase 2 OS=Homo sapiens OX=9606 GN=PMM2 PE=1 SV=1	9	2	28.1	23.1	23.4	0.12963	0.204724	1.5793	0.659288
High	Master Protein	O75223	Gamma-glutamylcyclotransferase OS=Homo sapiens OX=9606 GN=GGCT PE=1 SV=1	22	4	21	76	77.5	0.426487	0.67804	1.58983	0.668869
High	Master Protein	Q16763	Ubiquitin-conjugating enzyme E2 S OS=Homo sapiens OX=9606 GN=UBE2S PE=1 SV=2	9	2	23.8	104	106.1	0.583614	0.928259	1.59054	0.669513
High	Master Protein	P99999	Cytochrome c OS=Homo sapiens OX=9606 GN=CYCS PE=1 SV=2	21	2	11.7	111	113.4	0.622896	0.992126	1.59276	0.671533
High	Master Protein	Q8N2K0	Monoacylglycerol lipase ABHD12 OS=Homo sapiens OX=9606 GN=ABHD12 PE=1 SV=2	5	2	45.1	36.5	37.3	0.204826	0.326334	1.59323	0.671951
High	Master Protein	O15269	Serine palmitoyltransferase 1 OS=Homo sapiens OX=9606 GN=SPTLC1 PE=1 SV=1	4	2	52.7	43.8	44.9	0.245791	0.392826	1.59821	0.676457
High	Master Protein	J3KN66	Torsin-1A-interacting protein 1 OS=Homo sapiens OX=9606 GN=TOR1AIP1 PE=1 SV=1	13	7	67.8	166.3	170.6	0.933221	1.49256	1.59937	0.677501
High	Master Protein	P41227	N-alpha-acetyltransferase 10 OS=Homo sapiens OX=9606 GN=NAA10 PE=1 SV=1	25	4	26.4	56.2	57.7	0.315376	0.504812	1.60067	0.678673
High	Master Protein	Q5LJA9	Ubiquitin carboxyl-terminal hydrolase (Fragment) OS=Homo sapiens OX=9606 GN=UCHL5 PE=1 SV=1	18	4	41.7	118.1	121.4	0.662738	1.06212	1.60262	0.680431
High	Master Protein	A0A1W2PNP0	GPI transamidase component PIG-T (Fragment) OS=Homo sapiens OX=9606 GN=PIGT PE=1 SV=1	4	3	65.9	19.5	20.1	0.109428	0.175853	1.60703	0.684393
High	Master Protein	S4R3N1	HSPE1-MOB4 readthrough OS=Homo sapiens OX=9606 GN=HSPE1-MOB4 PE=3 SV=1	15	4	29.7	27.6	28.5	0.154882	0.249344	1.60989	0.686966
High	Master Protein	Q96HE7	ERO1-like protein alpha OS=Homo sapiens OX=9606 GN=ERO1A PE=1 SV=2	31	12	54.4	355.3	367.7	1.99383	3.21697	1.61347	0.690163
High	Master Protein	P04181	Ornithine aminotransferase, mitochondrial OS=Homo sapiens OX=9606 GN=OAT PE=1 SV=1	10	4	48.5	141.5	146.6	0.794052	1.28259	1.61525	0.691755
High	Master Protein	P46776	60S ribosomal protein L27a OS=Homo sapiens OX=9606 GN=RPL27A PE=1 SV=2	22	4	16.6	250.3	259.7	1.4046	2.27209	1.61761	0.69386
High	Master Protein	P54136	Arginine--tRNA ligase, cytoplasmic OS=Homo sapiens OX=9606 GN=RARS PE=1 SV=2	27	16	75.3	724.1	752.4	4.06341	6.58268	1.61999	0.695983
High	Master Protein	P31150	Rab GDP dissociation inhibitor alpha OS=Homo sapiens OX=9606 GN=GDI1 PE=1 SV=2	27	10	50.6	234.1	243.9	1.31369	2.13386	1.62432	0.699837
High	Master Protein	A0A1B0GUA3	KIF1-binding protein OS=Homo sapiens OX=9606 GN=KIF1BP PE=1 SV=1	9	4	74.7	88.8	92.6	0.498316	0.810149	1.62577	0.701124
High	Master Protein	Q9NR45	Sialic acid synthase OS=Homo sapiens OX=9606 GN=NANS PE=1 SV=2	17	5	40.3	207.4	216.3	1.16386	1.89239	1.62596	0.70129
High	Master Protein	P62873	Guanine nucleotide-binding protein G(I)/G(S)/G(T) subunit beta-1 OS=Homo sapiens OX=9606 GN=GNB1 PE=1 SV=3	18	6	37.4	62	64.7	0.347924	0.566054	1.62695	0.702169
High	Master Protein	O75494	Serine/arginine-rich splicing factor 10 OS=Homo sapiens OX=9606 GN=SRSF10 PE=1 SV=1	9	2	31.3	57	59.5	0.319865	0.52056	1.62743	0.7026
High	Master Protein	O60637	Tetraspanin-3 OS=Homo sapiens OX=9606 GN=TSPAN3 PE=2 SV=1	9	2	28	48.9	51.2	0.274411	0.447944	1.63238	0.706981
High	Master Protein	P21266	Glutathione S-transferase Mu 3 OS=Homo sapiens OX=9606 GN=GSTM3 PE=1 SV=3	35	8	26.5	171.4	179.7	0.961841	1.57218	1.63455	0.708895
High	Master Protein	Q8WWI1	LIM domain only protein 7 OS=Homo sapiens OX=9606 GN=LMO7 PE=1 SV=3	4	5	192.6	19.6	20.6	0.109989	0.180227	1.6386	0.712463
High	Master Protein	Q92504	Zinc transporter SLC39A7 OS=Homo sapiens OX=9606 GN=SLC39A7 PE=1 SV=2	5	3	50.1	99.9	105.3	0.560606	0.92126	1.64333	0.716621
High	Master Protein	Q9H2U2	Inorganic pyrophosphatase 2, mitochondrial OS=Homo sapiens OX=9606 GN=PPA2 PE=1 SV=2	25	9	37.9	116	122.9	0.650954	1.07524	1.65179	0.724032
High	Master Protein	P27824	Calnexin OS=Homo sapiens OX=9606 GN=CANX PE=1 SV=2	31	25	67.5	1937.8	2054.9	10.8743	17.9781	1.65327	0.72532
High	Master Protein	O43237	Cytoplasmic dynein 1 light intermediate chain 2 OS=Homo sapiens OX=9606 GN=DYNC1LI2 PE=1 SV=1	5	2	54.1	8.2	8.7	0.0460157	0.0761155	1.65412	0.726063
High	Master Protein	Q9NS69	Mitochondrial import receptor subunit TOM22 homolog OS=Homo sapiens OX=9606 GN=TOMM22 PE=1 SV=3	26	2	15.5	13.6	14.5	0.0763187	0.126859	1.66223	0.733118
High	Master Protein	P02786	Transferrin receptor protein 1 OS=Homo sapiens OX=9606 GN=TFRC PE=1 SV=2	33	21	84.8	845.5	903.3	4.74467	7.90289	1.66564	0.736072
High	Master Protein	P09132	Signal recognition particle 19 kDa protein OS=Homo sapiens OX=9606 GN=SRP19 PE=1 SV=3	18	2	16.1	14.6	15.6	0.0819304	0.136483	1.66584	0.73625
High	Master Protein	Q7Z3B4	Nucleoporin p54 OS=Homo sapiens OX=9606 GN=NUP54 PE=1 SV=2	4	3	55.4	26.2	28.1	0.147026	0.245844	1.67212	0.741675
High	Master Protein	Q13136	Liprin-alpha-1 OS=Homo sapiens OX=9606 GN=PPFIA1 PE=1 SV=1	2	2	135.7	12.4	13.3	0.0695847	0.11636	1.67221	0.741758
High	Master Protein	Q8N884	Cyclic GMP-AMP synthase OS=Homo sapiens OX=9606 GN=CGAS PE=1 SV=2	16	7	58.8	399.5	428.9	2.24186	3.75241	1.67379	0.743118
High	Master Protein	P05026	Sodium/potassium-transporting ATPase subunit beta-1 OS=Homo sapiens OX=9606 GN=ATP1B1 PE=1 SV=1	20	5	35	242.6	261.4	1.36139	2.28696	1.67987	0.748352
High	Master Protein	P07205	Phosphoglycerate kinase 2 OS=Homo sapiens OX=9606 GN=PGK2 PE=1 SV=3	9	6	44.8	10.3	11.1	0.0578002	0.0971129	1.68015	0.748587
High	Master Protein	Q9BQG0	Myb-binding protein 1A OS=Homo sapiens OX=9606 GN=MYBBP1A PE=1 SV=2	3	5	148.8	111.4	120.1	0.62514	1.05074	1.68081	0.749159
High	Master Protein	O75718	Cartilage-associated protein OS=Homo sapiens OX=9606 GN=CRTAP PE=1 SV=1	14	4	46.5	162.4	175.5	0.911336	1.53543	1.68482	0.752591
High	Master Protein	P48163	NADP-dependent malic enzyme OS=Homo sapiens OX=9606 GN=ME1 PE=1 SV=1	6	4	64.1	104.7	113.2	0.587542	0.990376	1.68563	0.753284
High	Master Protein	Q92973	Transportin-1 OS=Homo sapiens OX=9606 GN=TNPO1 PE=1 SV=2	21	15	102.3	736.8	797.8	4.13468	6.97988	1.68813	0.755426
High	Master Protein	Q9BRR6	ADP-dependent glucokinase OS=Homo sapiens OX=9606 GN=ADPGK PE=1 SV=1	6	2	54.1	21.5	23.3	0.120651	0.20385	1.68958	0.756665
High	Master Protein	O00469	Procollagen-lysine,2-oxoglutarate 5-dioxygenase 2 OS=Homo sapiens OX=9606 GN=PLOD2 PE=1 SV=2	9	5	84.6	110.2	119.9	0.618406	1.04899	1.69629	0.762379
High	Master Protein	P62306	Small nuclear ribonucleoprotein F OS=Homo sapiens OX=9606 GN=SNRPF PE=1 SV=1	24	3	9.7	64.6	70.5	0.362514	0.616798	1.70145	0.766761
High	Master Protein	P10155	60 kDa SS-A/Ro ribonucleoprotein OS=Homo sapiens OX=9606 GN=TROVE2 PE=1 SV=2	11	6	60.6	229.1	250.2	1.28563	2.18898	1.70264	0.767776
High	Master Protein	Q7L2H7	Eukaryotic translation initiation factor 3 subunit M OS=Homo sapiens OX=9606 GN=EIF3M PE=1 SV=1	14	4	42.5	267.3	292.4	1.5	2.55818	1.70545	0.770155
High	Master Protein	H0YA96	Heterogeneous nuclear ribonucleoprotein D0 (Fragment) OS=Homo sapiens OX=9606 GN=HNRNPD PE=1 SV=1	41	10	23.9	27.7	30.4	0.155443	0.265967	1.71102	0.774857
High	Master Protein	Q9ULC4	Malignant T-cell-amplified sequence 1 OS=Homo sapiens OX=9606 GN=MCTS1 PE=1 SV=1	36	4	20.5	95.9	105.5	0.538159	0.92301	1.71512	0.778312
High	Master Protein	Q99747	Gamma-soluble NSF attachment protein OS=Homo sapiens OX=9606 GN=NAPG PE=1 SV=1	22	6	34.7	165.8	182.8	0.930415	1.5993	1.71891	0.781494
High	Master Protein	Q13740	CD166 antigen OS=Homo sapiens OX=9606 GN=ALCAM PE=1 SV=2	13	7	65.1	423.1	468.2	2.3743	4.09624	1.72524	0.786798
High	Master Protein	Q96CS3	FAS-associated factor 2 OS=Homo sapiens OX=9606 GN=FAF2 PE=1 SV=2	13	5	52.6	73.1	81	0.410213	0.708661	1.72754	0.788722
High	Master Protein	P51665	26S proteasome non-ATPase regulatory subunit 7 OS=Homo sapiens OX=9606 GN=PSMD7 PE=1 SV=2	21	4	37	79.2	88	0.444444	0.769904	1.73228	0.792675
High	Master Protein	O96005	Cleft lip and palate transmembrane protein 1 OS=Homo sapiens OX=9606 GN=CLPTM1 PE=1 SV=1	4	2	76	66.1	73.5	0.370932	0.643045	1.73359	0.793766
High	Master Protein	H7BY55	Complement decay-accelerating factor OS=Homo sapiens OX=9606 GN=CD55 PE=1 SV=2	9	6	58.9	233.1	259.6	1.30808	2.27122	1.7363	0.796013
High	Master Protein	A0A0A0MRM9	Nucleolar and coiled-body phosphoprotein 1 (Fragment) OS=Homo sapiens OX=9606 GN=NOLC1 PE=1 SV=1	6	4	74.6	187.9	209.3	1.05443	1.83115	1.73662	0.796279
High	Master Protein	P50454	Serpin H1 OS=Homo sapiens OX=9606 GN=SERPINH1 PE=1 SV=2	47	16	46.4	1250	1393.6	7.01459	12.1925	1.73816	0.79756
High	Master Protein	Q9Y5K6	CD2-associated protein OS=Homo sapiens OX=9606 GN=CD2AP PE=1 SV=1	5	3	71.4	46.9	52.3	0.263187	0.457568	1.73856	0.797895
High	Master Protein	Q7Z434	Mitochondrial antiviral-signaling protein OS=Homo sapiens OX=9606 GN=MAVS PE=1 SV=2	11	5	56.5	137.9	154.1	0.77385	1.34821	1.74221	0.800916
High	Master Protein	A0MZ66	Shootin-1 OS=Homo sapiens OX=9606 GN=SHTN1 PE=1 SV=4	4	3	71.6	43.3	48.4	0.242985	0.423447	1.74269	0.801312
High	Master Protein	Q70J99	Protein unc-13 homolog D OS=Homo sapiens OX=9606 GN=UNC13D PE=1 SV=1	4	3	123.2	19.5	21.8	0.109428	0.190726	1.74294	0.801526
High	Master Protein	Q15758	Neutral amino acid transporter B(0) OS=Homo sapiens OX=9606 GN=SLC1A5 PE=1 SV=2	10	5	56.6	212.4	238.4	1.19192	2.08574	1.7499	0.807272
High	Master Protein	Q14257	Reticulocalbin-2 OS=Homo sapiens OX=9606 GN=RCN2 PE=1 SV=1	14	3	36.9	18.7	21	0.104938	0.183727	1.75081	0.808023
High	Master Protein	Q9BXJ9	N-alpha-acetyltransferase 15, NatA auxiliary subunit OS=Homo sapiens OX=9606 GN=NAA15 PE=1 SV=1	10	9	101.2	263.2	297.4	1.47699	2.60192	1.76164	0.816917
High	Master Protein	Q96C19	EF-hand domain-containing protein D2 OS=Homo sapiens OX=9606 GN=EFHD2 PE=1 SV=1	41	10	26.7	518	587.8	2.90685	5.14261	1.76914	0.823045
High	Master Protein	O60701	UDP-glucose 6-dehydrogenase OS=Homo sapiens OX=9606 GN=UGDH PE=1 SV=1	8	4	55	133.1	151.3	0.746914	1.32371	1.77224	0.825573
High	Master Protein	P61758	Prefoldin subunit 3 OS=Homo sapiens OX=9606 GN=VBP1 PE=1 SV=3	18	4	22.6	164.6	187.3	0.923681	1.63867	1.77406	0.827058
High	Master Protein	A0A0J9YWL0	Beta/gamma crystallin domain-containing protein 1 OS=Homo sapiens OX=9606 GN=CRYBG1 PE=1 SV=1	2	4	231.6	84.7	96.4	0.475309	0.843395	1.77441	0.827343
High	Master Protein	O95864	Fatty acid desaturase 2 OS=Homo sapiens OX=9606 GN=FADS2 PE=1 SV=1	4	2	52.2	246.4	280.8	1.38272	2.45669	1.77672	0.829213
High	Master Protein	Q9NZ01	Very-long-chain enoyl-CoA reductase OS=Homo sapiens OX=9606 GN=TECR PE=1 SV=1	21	8	36	386.4	442.4	2.16835	3.87052	1.78501	0.835928
High	Master Protein	P07099	Epoxide hydrolase 1 OS=Homo sapiens OX=9606 GN=EPHX1 PE=1 SV=1	9	5	52.9	261.6	301	1.46801	2.63342	1.79387	0.843073
High	Master Protein	Q9NRX5	Serine incorporator 1 OS=Homo sapiens OX=9606 GN=SERINC1 PE=1 SV=1	7	2	50.5	104.8	120.8	0.588103	1.05687	1.79708	0.845654
High	Master Protein	O60264	SWI/SNF-related matrix-associated actin-dependent regulator of chromatin subfamily A member 5 OS=Homo sapiens OX=9606 GN=SMARCA5 PE=1 SV=1	5	5	121.8	15	17.3	0.0841751	0.151356	1.79811	0.846481
High	Master Protein	Q9H9B4	Sideroflexin-1 OS=Homo sapiens OX=9606 GN=SFXN1 PE=1 SV=4	24	6	35.6	162.2	187.7	0.910213	1.64217	1.80416	0.851327
High	Master Protein	P30486	HLA class I histocompatibility antigen, B-48 alpha chain OS=Homo sapiens OX=9606 GN=HLA-B PE=1 SV=1	31	10	40.3	9.9	11.5	0.0555556	0.100612	1.81102	0.856805
High	Master Protein	P36551	Oxygen-dependent coproporphyrinogen-III oxidase, mitochondrial OS=Homo sapiens OX=9606 GN=CPOX PE=1 SV=3	15	6	50.1	207.6	241.3	1.16498	2.11111	1.81214	0.857693
High	Master Protein	Q15631	Translin OS=Homo sapiens OX=9606 GN=TSN PE=1 SV=1	13	2	26.2	45.5	53	0.255331	0.463692	1.81604	0.860798
High	Master Protein	P55010	Eukaryotic translation initiation factor 5 OS=Homo sapiens OX=9606 GN=EIF5 PE=1 SV=2	17	6	49.2	170.5	199.4	0.95679	1.74453	1.82332	0.866566
High	Master Protein	Q04760	Lactoylglutathione lyase OS=Homo sapiens OX=9606 GN=GLO1 PE=1 SV=4	28	5	20.8	184.6	216.9	1.03591	1.89764	1.83185	0.873299
High	Master Protein	P98179	RNA-binding protein 3 OS=Homo sapiens OX=9606 GN=RBM3 PE=1 SV=1	32	5	17.2	193.7	227.9	1.08698	1.99388	1.83432	0.875249
High	Master Protein	A0A087WYT3	Prostaglandin E synthase 3 OS=Homo sapiens OX=9606 GN=PTGES3 PE=1 SV=1	20	3	19.1	94.4	111.1	0.529742	0.972003	1.83486	0.875672
High	Master Protein	Q9UBB4	Ataxin-10 OS=Homo sapiens OX=9606 GN=ATXN10 PE=1 SV=1	12	5	53.5	107.1	126.1	0.60101	1.10324	1.83564	0.876282
High	Master Protein	Q99880	Histone H2B type 1-L OS=Homo sapiens OX=9606 GN=HIST1H2BL PE=1 SV=3	52	18	13.9	76.3	90.3	0.428171	0.790026	1.84512	0.883715
High	Master Protein	P61927	60S ribosomal protein L37 OS=Homo sapiens OX=9606 GN=RPL37 PE=1 SV=2	18	2	11.1	39.2	46.4	0.219978	0.405949	1.84541	0.883943
High	Master Protein	Q15404	Ras suppressor protein 1 OS=Homo sapiens OX=9606 GN=RSU1 PE=1 SV=3	9	3	31.5	53.8	63.7	0.301908	0.557305	1.84594	0.884359
High	Master Protein	P49257	Protein ERGIC-53 OS=Homo sapiens OX=9606 GN=LMAN1 PE=1 SV=2	17	7	57.5	383.6	455.9	2.15264	3.98863	1.8529	0.889787
High	Master Protein	Q99471	Prefoldin subunit 5 OS=Homo sapiens OX=9606 GN=PFDN5 PE=1 SV=2	15	2	17.3	96.8	115.4	0.54321	1.00962	1.85863	0.894236
High	Master Protein	P11387	DNA topoisomerase 1 OS=Homo sapiens OX=9606 GN=TOP1 PE=1 SV=2	21	14	90.7	635.7	758.7	3.56734	6.6378	1.86071	0.895855
High	Master Protein	X6R2S6	Signal peptidase complex subunit 1 OS=Homo sapiens OX=9606 GN=SPCS1 PE=1 SV=1	10	2	18.3	31.5	37.7	0.176768	0.329834	1.86592	0.899885
High	Master Protein	Q9BRX2	Protein pelota homolog OS=Homo sapiens OX=9606 GN=PELO PE=1 SV=2	10	4	43.3	80.3	96.3	0.450617	0.84252	1.8697	0.902808
High	Master Protein	P52732	Kinesin-like protein KIF11 OS=Homo sapiens OX=9606 GN=KIF11 PE=1 SV=2	2	3	119.1	31.2	37.6	0.175084	0.328959	1.87886	0.909859
High	Master Protein	Q9NZN4	EH domain-containing protein 2 OS=Homo sapiens OX=9606 GN=EHD2 PE=1 SV=2	5	3	61.1	79.1	95.6	0.443883	0.836395	1.88427	0.914005
High	Master Protein	O75312	Zinc finger protein ZPR1 OS=Homo sapiens OX=9606 GN=ZPR1 PE=1 SV=1	8	3	50.9	36.3	43.9	0.203704	0.384077	1.88547	0.914923
High	Master Protein	Q9Y617	Phosphoserine aminotransferase OS=Homo sapiens OX=9606 GN=PSAT1 PE=1 SV=2	22	8	40.4	399.2	488.4	2.24018	4.27297	1.90742	0.931623
High	Master Protein	P09467	Fructose-1,6-bisphosphatase 1 OS=Homo sapiens OX=9606 GN=FBP1 PE=1 SV=5	11	2	36.8	19.8	24.3	0.111111	0.212598	1.91339	0.936128
High	Master Protein	P40937	Replication factor C subunit 5 OS=Homo sapiens OX=9606 GN=RFC5 PE=1 SV=1	6	2	38.5	40.1	49.4	0.225028	0.432196	1.92063	0.941581
High	Master Protein	P48507	Glutamate--cysteine ligase regulatory subunit OS=Homo sapiens OX=9606 GN=GCLM PE=1 SV=1	32	7	30.7	170.6	210.9	0.957351	1.84514	1.92734	0.946613
High	Master Protein	Q969E2	Secretory carrier-associated membrane protein 4 OS=Homo sapiens OX=9606 GN=SCAMP4 PE=1 SV=1	16	2	25.7	29.2	36.3	0.163861	0.317585	1.93814	0.954673
High	Master Protein	P62633	Cellular nucleic acid-binding protein OS=Homo sapiens OX=9606 GN=CNBP PE=1 SV=1	21	3	19.5	8.9	11.1	0.0499439	0.0971129	1.94444	0.959354
High	Master Protein	P15121	Aldose reductase OS=Homo sapiens OX=9606 GN=AKR1B1 PE=1 SV=3	38	9	35.8	469.9	589.2	2.63692	5.15486	1.95487	0.967076
High	Master Protein	P60981	Destrin OS=Homo sapiens OX=9606 GN=DSTN PE=1 SV=3	35	7	18.5	224.5	281.6	1.25982	2.46369	1.95559	0.967604
High	Master Protein	P39687	Acidic leucine-rich nuclear phosphoprotein 32 family member A OS=Homo sapiens OX=9606 GN=ANP32A PE=1 SV=1	26	7	28.6	87.6	111.3	0.491582	0.973753	1.98085	0.986123
High	Master Protein	Q6ZRP7	Sulfhydryl oxidase 2 OS=Homo sapiens OX=9606 GN=QSOX2 PE=1 SV=3	3	3	77.5	40.6	51.7	0.227834	0.452318	1.9853	0.989356
High	Master Protein	Q53GQ0	Very-long-chain 3-oxoacyl-CoA reductase OS=Homo sapiens OX=9606 GN=HSD17B12 PE=1 SV=2	19	6	34.3	195.1	248.5	1.09484	2.1741	1.98578	0.989704
High	Master Protein	P07996	Thrombospondin-1 OS=Homo sapiens OX=9606 GN=THBS1 PE=1 SV=2	9	10	129.3	236.3	301.4	1.32604	2.63692	1.98857	0.991732
High	Master Protein	Q08379	Golgin subfamily A member 2 OS=Homo sapiens OX=9606 GN=GOLGA2 PE=1 SV=3	2	2	113	16.2	20.7	0.0909091	0.181102	1.99213	0.994309
High	Master Protein	E7ES60	Ras-related protein Rab-34, isoform NARR OS=Homo sapiens OX=9606 GN=RAB34 PE=1 SV=2	7	2	29.9	22.1	28.3	0.124018	0.247594	1.99644	0.997428
High	Master Protein	P13726	Tissue factor OS=Homo sapiens OX=9606 GN=F3 PE=1 SV=1	14	3	33	88.7	114.1	0.497755	0.99825	2.0055	1.00396
High	Master Protein	P10620	Microsomal glutathione S-transferase 1 OS=Homo sapiens OX=9606 GN=MGST1 PE=1 SV=1	19	2	17.6	92.2	122.3	0.517396	1.06999	2.06803	1.04826
High	Master Protein	O00622	Protein CYR61 OS=Homo sapiens OX=9606 GN=CYR61 PE=1 SV=1	14	5	42	97.7	136.9	0.54826	1.19773	2.18459	1.12736
High	Master Protein	E9PR17	CD59 glycoprotein OS=Homo sapiens OX=9606 GN=CD59 PE=1 SV=1	25	3	14.5	90.2	127.5	0.506173	1.11549	2.20376	1.13997
High	Master Protein	P84103	Serine/arginine-rich splicing factor 3 OS=Homo sapiens OX=9606 GN=SRSF3 PE=1 SV=1	23	4	19.3	112.3	161	0.630191	1.40857	2.23515	1.16037
High	Master Protein	O14684	Prostaglandin E synthase OS=Homo sapiens OX=9606 GN=PTGES PE=1 SV=2	18	3	17.1	75.1	108.4	0.421437	0.948381	2.25035	1.17015
High	Master Protein	Q13501	Sequestosome-1 OS=Homo sapiens OX=9606 GN=SQSTM1 PE=1 SV=1	20	6	47.7	110	161.9	0.617284	1.41645	2.29465	1.19827
High	Master Protein	Q9UKK3	Poly [ADP-ribose] polymerase 4 OS=Homo sapiens OX=9606 GN=PARP4 PE=1 SV=3	2	3	192.5	14.7	21.9	0.0824916	0.191601	2.32267	1.21579
High	Master Protein	Q9Y570	Protein phosphatase methylesterase 1 OS=Homo sapiens OX=9606 GN=PPME1 PE=1 SV=3	19	6	42.3	273.7	409.5	1.53591	3.58268	2.3326	1.22194
High	Master Protein	Q8NFJ5	Retinoic acid-induced protein 3 OS=Homo sapiens OX=9606 GN=GPRC5A PE=1 SV=2	9	2	40.2	17.8	27	0.0998878	0.23622	2.36486	1.24175
High	Master Protein	Q9Y2W2	WW domain-binding protein 11 OS=Homo sapiens OX=9606 GN=WBP11 PE=1 SV=1	3	2	70	7.3	11.2	0.0409652	0.0979878	2.39197	1.2582
High	Master Protein	G3V3D1	NPC intracellular cholesterol transporter 2 (Fragment) OS=Homo sapiens OX=9606 GN=NPC2 PE=1 SV=1	12	2	23.7	101.1	159.2	0.56734	1.39283	2.45501	1.29573
High	Master Protein	Q99805	Transmembrane 9 superfamily member 2 OS=Homo sapiens OX=9606 GN=TM9SF2 PE=1 SV=1	6	4	75.7	56.6	96.3	0.317621	0.84252	2.6526	1.40741
High	Master Protein	P50453	Serpin B9 OS=Homo sapiens OX=9606 GN=SERPINB9 PE=1 SV=1	23	6	42.4	58	98.9	0.325477	0.865267	2.65846	1.41059
High	Master Protein	Q96IZ0	PRKC apoptosis WT1 regulator protein OS=Homo sapiens OX=9606 GN=PAWR PE=1 SV=1	14	2	36.5	24.8	45.8	0.139169	0.4007	2.87922	1.52568
High	Master Protein	Q01628	Interferon-induced transmembrane protein 3 OS=Homo sapiens OX=9606 GN=IFITM3 PE=1 SV=2	12	2	14.6	7.8	15.2	0.043771	0.132983	3.03816	1.6032
High	Master Protein	Q8N9T8	Protein KRI1 homolog OS=Homo sapiens OX=9606 GN=KRI1 PE=1 SV=3	5	3	82.5	22	44.7	0.123457	0.391076	3.16772	1.66344
High	Master Protein	H0Y368	Dolichol-phosphate mannosyltransferase subunit 1 (Fragment) OS=Homo sapiens OX=9606 GN=DPM1 PE=1 SV=1	9	2	33.3	39.2	81.1	0.219978	0.709536	3.22549	1.68952
High	Master Protein	Q9NYP7	Elongation of very long chain fatty acids protein 5 OS=Homo sapiens OX=9606 GN=ELOVL5 PE=1 SV=1	6	2	35.3	45.2	103.5	0.253648	0.905512	3.56996	1.83591
